# Supplementary material
Source: PubMed Central journal article supplement (PMC1757043)
Supplement: jepicomh_59_6_460__1.pdf [file jepicomh_59_6_460__1.pdf]

## Validity of Antonovsky's Sense of Coherence Scale – a systematic review.

Monica Eriksson, Bengt Lindström

### Appendix

Table 1. Description of the material – a flow chart.

|                                                                                                                                                                                                 |            |
|-------------------------------------------------------------------------------------------------------------------------------------------------------------------------------------------------|------------|
| Number of papers                                                                                                                                                                                |            |
| Total hits of the search                                                                                                                                                                        | 1215       |
| ↓                                                                                                                                                                                               |            |
| Corrected for double listing in doctoral thesis (table 10)                                                                                                                                      | 1193       |
| ↓                                                                                                                                                                                               |            |
| Corrected for double listing in the databases (table 9)                                                                                                                                         | 509        |
| ↓                                                                                                                                                                                               |            |
| Included papers published in McCubbin et al. Stress, coping, and health in families. Sense of coherence and resiliency. Thousand Oaks 1998                                                      | 519        |
| ↓                                                                                                                                                                                               |            |
| Papers excluded because of double publishing (table 9: 208, 235, 390)                                                                                                                           | 516        |
| ↓                                                                                                                                                                                               |            |
| Papers excluded because of missing the words "salutogenesis" and/or "sense of coherence" and the translations in the heading, abstract and/or key word (table 9: 64, 263, 268, 270)             | 512        |
| ↓                                                                                                                                                                                               |            |
| Papers excluded because of no references to Antonovsky's SOC concept (table 9: 25, 26, 30, 33, 50, 58, 82, 131, 156, 234, 299, 315, 328, 349, 354, 355, 360, 398, 429, 457, 471, 474, 496, 480) | 488        |
| ↓                                                                                                                                                                                               |            |
| Papers excluded because of insufficient validity (table 9: 24, 27, 70, 89, 97, 110, 136, 141, 145, 182, 189, 277, 278, 279, 320, 346, 366, 373, 376, 378, 380, 443, 446, 447, 473)              | 463        |
| ↓                                                                                                                                                                                               |            |
| Papers not used the Life Orientation Questionnaire to measure coherence (table 9: 265, 266, 267, 504, 505)                                                                                      | 458        |
| <b>The total number of included papers</b>                                                                                                                                                      | <b>458</b> |

Table 2. Statistical data from studies using the SOC-29 questionnaire published 1992-2003.

| Country      | Sample                                                                   | Language  | N                     | Mean         | SD    | $\alpha$ | First author                        |
|--------------|--------------------------------------------------------------------------|-----------|-----------------------|--------------|-------|----------|-------------------------------------|
| USA          | College students and general population                                  | English   | 116 students          | 133.38       | 21.91 |          | Amirkhan J.H. 2003 <sup>1</sup>     |
|              |                                                                          |           | 90 students           | 137.13       | 23.12 |          |                                     |
|              |                                                                          |           | 52 students           | 133.44       | 21.07 |          |                                     |
| Sweden       | Patients with musculoskeletal pain                                       | Swedish   | 75 general population | 130.39       | 22.79 | .92      | Atroush I. 2002 <sup>2</sup>        |
| USA          | Adolescents with Cystic Fibrosis                                         | English   | 189 all               | 151.00       | 24.00 | .92      | Baker L. 1998 <sup>1</sup>          |
| Germany      | Patients with postmenopausal osteoporosis                                | German    | 123                   | 134.90       | 25.40 |          | Begerow B. 1999 <sup>4</sup>        |
|              |                                                                          |           | 50 total              | 136.00       | 43.00 | .89      |                                     |
|              |                                                                          |           | 30 group A            | 143.00       | 41.00 | .90      |                                     |
|              |                                                                          |           | 20 group B            | 128.80       | 17.70 | .87      | Ben-David A. 1996 <sup>5</sup>      |
| Israel       | College students aged 16-29 years                                        | Hebrew    | 294                   | 140.47       | 18.35 | .87      | Ben-David A. 1997 <sup>6</sup>      |
| Israel       | Immigrants (Ethiopians)                                                  | Hebrew    | 40 families           | 136.82       | 23.31 | .87      | Ben-David A. 1999 <sup>7</sup>      |
| Israel       | College students                                                         | Hebrew    | 46 Ethiopians         | 140.09       | 19.35 |          |                                     |
|              |                                                                          |           | 46 Israelis           | 129.00 total | 26.60 |          | Bengtsson-Tops A. 2000 <sup>8</sup> |
| Sweden       | Schizophrenic patients aged 18-81 years                                  | Swedish   | 120                   | 134.00 men   | 13.00 |          |                                     |
|              |                                                                          |           |                       | 123.00 women | 53.00 |          |                                     |
|              |                                                                          |           |                       | 143.00 total | 24.00 | .90      | Berglund B. 2003 <sup>9</sup>       |
| Sweden       | Patients with Ehlers-Danlos syndrome                                     | Swedish   | 77                    | 142.00 women | 24.00 |          |                                     |
|              |                                                                          |           | 69 women              | 150.00 men   | 21.00 |          |                                     |
|              |                                                                          |           | 8 men                 |              |       |          |                                     |
| USA          | College students and patients with schizophrenia                         | English   | 133 students          | 137.10       | 24.10 |          | Bigler M. 2001 <sup>10</sup>        |
| Singapore    | Singaporean subjects                                                     | English   | 31 patients           |              |       | .74      | Bishop G.D. 1993 <sup>11</sup>      |
| Sweden       | Obese patients and controls                                              | Swedish   | 186                   | 134.00       | 22.00 |          | Björvell H. 1994 <sup>12</sup>      |
|              |                                                                          |           | 33 patients           | 151.00       | 18.00 |          |                                     |
|              |                                                                          |           | 145 controls          |              |       |          |                                     |
| Sweden       | Patients in long-term psychotherapy or psychoanalysis and healthy people | Swedish   | 405 patients          |              |       | .92      | Blomberg J. 2001 <sup>13</sup>      |
|              |                                                                          |           | 345 controls          | 139.00       | 24.00 | .92      |                                     |
| Sweden       | Patients with breast cancer                                              | Swedish   | 29 group 1            | 149.00       | 21.00 | .91      | Boman L. 1999 <sup>14</sup>         |
|              |                                                                          |           | 115 group 2           | 115.50       | 20.40 | .78      | Botha K. 2002 <sup>15</sup>         |
| South-Africa | Patients with essential hypertension                                     | Afrikaans | 196 all               |              |       |          |                                     |
|              |                                                                          | Sotho     | 102 Afrikaans         |              |       |          |                                     |
|              |                                                                          |           | 94 Sotho              |              |       |          |                                     |
| Sweden       | Students                                                                 | Swedish   | 328 all               | 142.50       | 21.40 | .91      | Botlner von M. 2003 <sup>16</sup>   |
|              |                                                                          |           | 160 women             | 162.00       | 21.00 |          |                                     |
|              |                                                                          |           | 168 men               |              |       |          |                                     |

|                |                                                     |           |                                                               |                                                                                                                                     |                                              |         |                                                                   |
|----------------|-----------------------------------------------------|-----------|---------------------------------------------------------------|-------------------------------------------------------------------------------------------------------------------------------------|----------------------------------------------|---------|-------------------------------------------------------------------|
| USA            | Native Americans and Anglo Americans                | English   | 81 NA<br>105 AA                                               | 134.40<br>134.50                                                                                                                    | 24.60<br>21.60                               |         | Bowman B.J. 1996 <sup>17</sup>                                    |
| Sweden         | Occupational therapy students                       | Swedish   | 71 students                                                   | 142.00                                                                                                                              | 16.00                                        |         | Brånholm I-B. 1998 <sup>18</sup>                                  |
| United Kingdom | Patients with rheumatoid arthritis                  | English   | 651 Swedes<br>89                                              | 144.10                                                                                                                              | 27.90                                        |         | Büchi S. 1998 <sup>19</sup>                                       |
| USA            | Patients with rheumatoid arthritis                  | English   | 828                                                           | 146.50                                                                                                                              | 29.40                                        |         | Callahan L. 1995 <sup>20</sup>                                    |
| South Africa   | Patients with major depressive disorder             |           | 50 patients                                                   | 100.56                                                                                                                              | 22.98                                        |         | Carstens J. 1997 <sup>21</sup>                                    |
| Sweden         | Control group                                       |           | 50 controls                                                   | 137.24                                                                                                                              | 24.39                                        |         |                                                                   |
| Sweden         | Subjects at high risk for mental illness            | Swedish   | 148                                                           | 152.60                                                                                                                              | 22.00                                        |         | Cederblad M 1995 <sup>22-26</sup><br>Dahlin L. 1993 <sup>26</sup> |
| Thailand       | Children and youths aged 7-18                       | Thai      | 483                                                           | 139.30-148.60                                                                                                                       |                                              |         | Cederblad M. 2001 <sup>27</sup>                                   |
| Thailand       | Adult family members                                | Thai      | 456 families<br>179 mothers<br>200 fathers<br>77 grandparents | 143.38<br>144.01<br>142.57<br>144.00                                                                                                | 24.03<br>24.67<br>22.96<br>25.48             |         | Cederblad M. 2003 <sup>28</sup>                                   |
| Sweden         | HIV-infected patients and control group             | Swedish   | 189 patients<br>145 controls                                  | 133.00 women<br>134.00 men<br>151.00 women<br>152.00 men                                                                            | 20.00<br>23.00<br>19.00<br>17.00             |         | Cederfjäll C. 2001 <sup>29</sup>                                  |
| Sweden         | HIV-infected patients in therapy                    | Swedish   | 99                                                            | 139.00 <sub>1</sub> , 139.00 <sub>2</sub><br>140.00 <sub>1</sub> , 141.00 <sub>2</sub><br>133.00 <sub>1</sub> , 127.00 <sub>2</sub> | 25.00, 27.00<br>24.00, 25.00<br>30.00, 30.00 | .91-.93 | Cederfjäll C. 2002 <sup>30</sup>                                  |
| New Zealand    | Older patients before and after a surgery operation | English   | 57                                                            |                                                                                                                                     |                                              |         | Chanberlain K. 1992 <sup>31</sup>                                 |
| South Africa   | General nurses                                      |           | 105                                                           | 141.28                                                                                                                              | 16.44                                        |         | Cilliers F. 2003 <sup>32</sup>                                    |
| Israel         | Women and men                                       | Hebrew    | 74                                                            |                                                                                                                                     |                                              |         | Cohen O. 1997 <sup>33</sup>                                       |
| Israel         | Married and divorced mothers                        | Hebrew    | 74                                                            | 137.17 <sup>e</sup> divorced<br>156.60 <sup>e</sup> married                                                                         | - <sub>f</sub><br>- <sub>f</sub>             |         | Cohen O. 2000 <sup>34</sup>                                       |
| Israel         | Divorced Muslim Arabs                               | Arabic    | 306 all<br>147 women<br>159 men                               | 121.80<br>124.37<br>144.80                                                                                                          | 23.52<br>21.03<br>19.01                      | .83     | Cohen O. 2003 <sup>35</sup>                                       |
| Bulgaria       | Nuclear operators                                   | Bulgarian | 15                                                            |                                                                                                                                     |                                              |         | Dalbockova D. 1995 <sup>36</sup>                                  |
| Israel         | Women with disabilities                             | Hebrew    | 88                                                            |                                                                                                                                     |                                              |         | Dangoor N. 1994 <sup>37</sup>                                     |
| Israel         | Cancer patients and healthy people                  | Hebrew    | 48 patients<br>46 controls                                    | 138.58-153.08<br>149.15-139.04                                                                                                      | 19.52-20.30<br>23.80-23.60                   | .90     | Delbar V. 2001 <sup>38</sup>                                      |
| Israel         | Male Israeli patients                               | Hebrew    | 209                                                           |                                                                                                                                     |                                              | .87     | Drory Y. 2002 <sup>39</sup>                                       |
| Poland         | Women staying in hospital after delivery            | Polish    | 523                                                           | 133.90                                                                                                                              | 48.90                                        | .91     | Dudek B. 1993 <sup>40</sup>                                       |
| Poland         | Fire fighters                                       | Polish    | 464                                                           | 148.46                                                                                                                              | 19.58                                        |         | Dudek B. 2000 <sup>41</sup>                                       |
| USA            | Students                                            | English   | 202                                                           | 137.30                                                                                                                              | 20.90                                        |         | Ebert S. 2002 <sup>42</sup>                                       |

|                |                                                                                 |                 |                                       |                                                                                                           |                                                 |                              |                                                    |
|----------------|---------------------------------------------------------------------------------|-----------------|---------------------------------------|-----------------------------------------------------------------------------------------------------------|-------------------------------------------------|------------------------------|----------------------------------------------------|
| Canada         | University undergraduates                                                       | English         | 298                                   | 132.91 women<br>133.21 men                                                                                | 19.92<br>20.35                                  | .88                          | Edwards M.J. 2001 <sup>43</sup>                    |
| USA            | Production workers                                                              | English         | 74                                    | 133.70-135.20                                                                                             | 25.90-28.90                                     | .88                          | Fiorentino L.M. 1998 <sup>44</sup>                 |
| USA            | Young homeless and substance-abusing women with children                        | English         | 72                                    |                                                                                                           |                                                 | .85                          | Flick L.H. 1998 <sup>45</sup>                      |
| Israel         | Israeli Jewish women with physical disabilities and controls                    | Hebrew          | 94 disabled<br>94 controls            | 115.78<br>142.36                                                                                          | 28.18<br>20.43                                  | .90                          | Florian V. 1994 <sup>46</sup>                      |
| USA            | Women and men                                                                   | English         | 374                                   |                                                                                                           |                                                 | .93                          | Frenz A. 1993 <sup>47</sup>                        |
| Norway         | Patients and controls                                                           | Norwegian       | 59                                    | 110.78 <sup>e</sup>                                                                                       | -f                                              | .94                          | Friborg O. 2003 <sup>48</sup>                      |
| Germany        | Traffic accident victims                                                        |                 | 276                                   | 140.65 <sup>e</sup>                                                                                       | -f                                              |                              | Frommberger U. 1999 <sup>49</sup>                  |
| Belgium        | Primary caregivers to dementing and nondementing chronically ill family members | Flemish (Dutch) | 51                                    | 144.00                                                                                                    | 26.00                                           | .84                          | Gallagher T.J. 1994 <sup>50</sup>                  |
| France         | French adults                                                                   | French          | 126                                   | 138.16                                                                                                    | 21.96                                           |                              | Gana K. 2001 <sup>51</sup>                         |
| United Kingdom | Open university students                                                        | English         | 55 patients<br>71 healthy             | 137.04<br>139.03                                                                                          | 26.73<br>17.56                                  | .88                          | Gibson L.M. 1997 <sup>52</sup>                     |
| Israel         | Daughters of women with breast cancer and healthy women                         | English         | 306                                   | 133.66                                                                                                    | 20.36                                           |                              | Gilbar O. 1998 <sup>53</sup>                       |
| Israel         | Women referred to a breast health clinic                                        | Hebrew          | 45                                    | 109.62 <sup>e</sup>                                                                                       | -f                                              |                              | Gilbar O. 2003 <sup>54</sup>                       |
| USA            | Patients with rheumatic disorders                                               | Hebrew          | 51                                    | 114.84 <sup>e</sup>                                                                                       | -f                                              | .95                          | Hawley D. 1992 <sup>55</sup>                       |
| USA            | College students                                                                | English         | 314                                   | 113.68 <sup>e</sup>                                                                                       | -f                                              | .93                          | Hittner J.B. 2000 <sup>56</sup>                    |
| Canada         | Patients attending home dialysis and their spouses                              | English         | 1333                                  | 148.00                                                                                                    | 29.66                                           | .92                          | Horsburgh M. 1998 <sup>57</sup>                    |
| USA            | Students                                                                        | English         | 150                                   | 131.00                                                                                                    | 28.20                                           | .91                          | Jorgensen R.S. 1999 <sup>58</sup>                  |
| Israel         | Kibbutz members                                                                 | Hebrew          | 28 couples                            | 143.50                                                                                                    | 28.10                                           | .91                          | Kaiser C. 1996 <sup>59</sup>                       |
| Sweden         | Patients after coronary artery bypass grafting                                  | Swedish         | 116                                   | 137.30                                                                                                    | 22.52                                           | .88                          | Kark J.D. 1996 <sup>60</sup>                       |
| Denmark        | Juvenile delinquents                                                            | Danish          | 437 total<br>228 religious            | 150.80 men<br>146.40 women                                                                                | 19.80<br>22.90                                  | .89                          | Karlsson I. 2002 <sup>61</sup>                     |
| Russia         | Patients with coronary heart disease                                            | Russia          | 193                                   | 147.10 men                                                                                                | 19.10                                           | .89                          | Koposov R. 2003 <sup>62</sup>                      |
| Sweden         | Nurses, patients and general population                                         | Hebrew          | 209 secular                           | 142.30 women                                                                                              | 20.00                                           | .88                          | Kravetz S. 1993 <sup>63</sup>                      |
| Sweden         | Cancer patients and healthy controls                                            | Swedish         | 111 Swedes<br>102 Danes<br>159<br>164 | 152.00 <sup>b</sup><br>143.00 <sup>b</sup><br>160.00-161.00 <sup>c</sup><br>151.00 <sup>b</sup><br>151.00 | 17.00<br>17.00<br>14.00-19.00<br>21.00<br>18.00 | .83<br>.85-.90<br>.89<br>.88 | Langius A. 1992 <sup>64</sup> , 1993 <sup>65</sup> |
| Sweden         | Cancer patients and healthy controls                                            | Swedish         | 42 patients                           | 150.00 total<br>137.00 women                                                                              | 22.00<br>22.00                                  | .89                          | Langius A. 1994 <sup>66</sup>                      |

|                |                                                                   |          |                                                                                  |                                                                                                                          |                                                                      |     |                                                                           |
|----------------|-------------------------------------------------------------------|----------|----------------------------------------------------------------------------------|--------------------------------------------------------------------------------------------------------------------------|----------------------------------------------------------------------|-----|---------------------------------------------------------------------------|
| Sweden         | Patients                                                          | Swedish  | 145 controls<br>165 breast ca patients<br>28 overweight patients<br>25 patients  | 158.00 men<br>151.00<br>148.00<br>134.00<br>144.00                                                                       | 17.00<br>18.00<br>21.00<br>22.00<br>29.00                            | .88 | Langius A. 1996 <sup>67</sup>                                             |
| Sweden         | Pentecostalis and reference group                                 | Swedish  | 37 pentecostalis<br>145 controls                                                 | 152.00<br>151.00                                                                                                         | 16.00<br>18.00                                                       |     | Langius A. 2001 <sup>68</sup>                                             |
| USA            | Dialysis nurses                                                   | English  | 238 all<br>224 female<br>14 male                                                 | 143.10<br>143.90<br>137.90                                                                                               | 23.00<br>22.40<br>26.00                                              |     | Lewis S. 1992 <sup>69</sup>                                               |
| USA            | Nephrology nurses in dialysis settings<br>Older people            | English  | 49                                                                               | 148.70                                                                                                                   | 24.20                                                                |     | Lewis S.L. 1994 <sup>70</sup>                                             |
| USA            | College students with disabilities                                | English  | 128                                                                              | 158.90                                                                                                                   | 22.90                                                                |     | Lewis J.S. 1996 <sup>71</sup>                                             |
| USA            | Female college students                                           | English  | 89                                                                               | 136.20                                                                                                                   | 29.40                                                                | .93 | Lustig D. 2000 <sup>72</sup>                                              |
| Sweden         | Patients with non-specific musculoskeletal disorder               | Swedish  | 145<br>23 BAT<br>22 FK<br>26 TAU                                                 | 146.50<br>134.00-141.00<br>132.00-135.00<br>140.00-142.00                                                                | 22.10<br>25.00-23.00<br>24.00-21.00<br>17.00-16.00                   | .91 | Lustig D. 2002 <sup>73</sup><br>Malmgren-Olsson E-B<br>2002 <sup>74</sup> |
| Israel         | Youths from disadvantaged neighbourhoods                          | Hebrew   | 137 all<br>57 experienced volunt<br>37 beginning volunt<br>42 uninvolved         | 136.30<br>124.41<br>130.50                                                                                               |                                                                      | .81 | Magen Z. 1992 <sup>75</sup>                                               |
| Israel         | Parents of handicapped children<br>Control families               | Hebrew   | 78 handicapped<br>83 controls                                                    | 139.49 <sup>e</sup> mothers<br>147.61 <sup>e</sup> fathers<br>146.16 <sup>e</sup> mothers<br>151.96 <sup>e</sup> fathers | - <sup>f</sup><br>- <sup>f</sup><br>- <sup>f</sup><br>- <sup>f</sup> | .86 | Margalit M. 1992 <sup>76</sup>                                            |
| USA            | Japanese-American and Anglo-American women                        | English  | 59                                                                               | 152.00, 151.00 A<br>146.00, 149.00 J                                                                                     | 21.07-24.33<br>20.78-26.33                                           |     | Milanesi L.C. 1998 <sup>77</sup>                                          |
| United Kingdom | Primary carer participants caring for an individual with dementia | English  | 25 service users<br>25 non-service users                                         | 113.10<br>146.60                                                                                                         | 28.40<br>21.60                                                       |     | Mockler D. 1998 <sup>78</sup>                                             |
| USA            | Women with IBS and healthy controls                               | English  | 324 all<br>235 IBS                                                               | 131.75<br>148.94                                                                                                         | 21.73<br>21.38                                                       |     | Motzer Adams S. 2003 <sup>79</sup>                                        |
| Japan          | Male office workers                                               | Japanese | 89 controls<br>125 total<br>75 present smoker<br>26 never smoker<br>24 ex-smoker | 128.00<br>124.00<br>133.00<br>132.00<br>127.30                                                                           | 17.00<br>15.40<br>16.40<br>20.50<br>19.70                            |     | Nakamura H. 2001 <sup>80</sup>                                            |
| Japan          | Male office workers                                               | Japanese | 101                                                                              | 157.21                                                                                                                   | 24.82                                                                | .91 | Nakamura H. 2003 <sup>81</sup>                                            |
| USA            | Older women                                                       | English  | 137                                                                              | 152.81                                                                                                                   | 33.33                                                                |     | Nesbitt B.J. 2000 <sup>82</sup>                                           |
| USA            | Post-liver transplant recipients                                  | English  | 230 all<br>72 non-working<br>122 working                                         | 142.85<br>157.01<br>142.33                                                                                               | 35.21<br>29.96                                                       |     | Newton S. 1999 <sup>83</sup>                                              |
| Sweden         | Patients with indigestion                                         | Swedish  | 18                                                                               | 142.33                                                                                                                   | 29.96                                                                |     | Nilsson B. 1997 <sup>84</sup>                                             |

|                |                                                                  |         |                        |  |                      |             |         |                                    |
|----------------|------------------------------------------------------------------|---------|------------------------|--|----------------------|-------------|---------|------------------------------------|
| Thailand       | Nursing students                                                 | Thai    | 132                    |  | 131.18-136.33        | 18.68-21.20 | .85     | Nintachan P. 2000 <sup>85</sup>    |
| Sweden         | Patients with ostomy surgery                                     | Swedish | 26 total               |  |                      |             | .79-.90 | Nordstrom G. 1995 <sup>86</sup>    |
| United Kingdom | Patients with total spinal cord transaction and healthy controls | English | 17 conventional ostomy |  | 147.70               | 25.30       |         |                                    |
|                |                                                                  |         | 9 continent ostomy     |  | 151.30               | 30.90 ns    |         |                                    |
|                |                                                                  |         | 20 patients            |  | 123.90               | 15.00       |         | O'Carroll R.E. 2003 <sup>87</sup>  |
|                |                                                                  |         | 20 controls            |  | 115.80               | 23.10       |         |                                    |
| South Africa   | Trained non-professional counselors                              | English | 130                    |  | 151.52 <sup>d</sup>  | 19.84       | .92     | Ortlepp K. 2002 <sup>88</sup>      |
| Sweden         | Patients with cancer                                             | Swedish | 16                     |  | 160.90               | 13.50       | .80     | Persson L. 2001 <sup>89</sup>      |
| New Zealand    | Hospitalized parasiticide                                        | English | 150                    |  |                      |             |         | Petrie K. 1992 <sup>90</sup>       |
| Poland         | Female toxicological inpatients                                  | Polish  | 150 all                |  | 108.60               | 28.90       |         | Polewka A. 2001 <sup>91</sup>      |
| Finland        | Middle-aged working men                                          | Finnish | 102 group 1            |  | 113.80               | 28.20       |         |                                    |
|                |                                                                  |         | 48 group 2             |  | 100.50               | 28.50       |         |                                    |
|                |                                                                  |         | 4405                   |  | 143.50 total         | 20.60       | .91     | Poppius E. 1999 <sup>92</sup>      |
| Sweden         | District nurses                                                  | Swedish | 33 total               |  | 146.00 white coll    |             |         |                                    |
|                |                                                                  |         | 21 supervisory group   |  | 142.80 blue coll     | 20.30       |         | Poppius E. 2003 <sup>93</sup>      |
|                |                                                                  |         | 12 comparison group    |  | 143.00 smokers       | 20.70       |         |                                    |
|                |                                                                  |         | 181                    |  | 143.70 non-smokers   | 20.30       |         |                                    |
|                |                                                                  |         | 86                     |  | 142.70 alc users     | 20.90       |         |                                    |
|                |                                                                  |         | 80                     |  | 144.30 alc non-users |             | .89     | Palsson M-B. 1996 <sup>94</sup>    |
|                |                                                                  |         | 80                     |  |                      | 17.50-16.60 |         |                                    |
| USA            | Patients with morbid obesity                                     | English | 21                     |  | 148.00-151.00        | 13.60-17.30 | .87     | Ray E. 2003 <sup>95</sup>          |
| Israel         | Handicapped and their relatives                                  | Hebrew  | 12                     |  | 154.00-153.00        | 26.00       | .85     | Ranfelt E. 2000 <sup>96</sup>      |
| Sweden         | Elderly people                                                   | Swedish | 152                    |  | 140.00               | 19.00       | .85     | Rena F. 1996 <sup>97</sup>         |
| Sweden         | Insulin-dependent diabetic subjects                              | Swedish | 58                     |  | 150.00               |             |         | Rena F. 1998 <sup>98</sup>         |
| Sweden         | Employees                                                        | Swedish | 107 all                |  |                      |             |         | Remenmark M. 1999 <sup>99</sup>    |
|                |                                                                  |         | 60 women               |  | 142.60               | 24.30       |         | Richardson A. 2001 <sup>100</sup>  |
|                |                                                                  |         | 47 men                 |  | 154.60               | 16.80       |         |                                    |
| Sweden         | Retirees and their spouses                                       | Swedish | 194                    |  | 145.00 female        | 18.00       |         | Runeson, R. 2003 <sup>101</sup>    |
| Israel         | Retirees                                                         | Hebrew  | 572 total              |  | 151.00 male          | 17.00       |         |                                    |
|                |                                                                  |         | 286 retirees           |  | 151.02               | 21.89       |         | Sagy S. 1992 <sup>102</sup>        |
|                |                                                                  |         | 286 spouses            |  | 154.50               | 20.62       |         |                                    |
| Israel         | Retirees                                                         | Hebrew  | 89                     |  | 147.53               | 22.58       |         |                                    |
| Finland        | University students                                              | Finnish | 117 all                |  | 148.67               | 37.23       | .92     | Sagy S. 2000 <sup>103</sup>        |
| Finland        | Psychiatric outpatients and community controls                   | Finnish | 28 clients             |  | 124.93               | 24.92       |         | Salmela-Aro K. 1992 <sup>104</sup> |
|                |                                                                  |         | 44 psychology student  |  | 140.40               | 21.73       |         |                                    |
|                |                                                                  |         | 45 technology student  |  | 145.04               | 20.11       | .93     | Sammallahi P. 1996 <sup>105</sup>  |
|                | 441 total                                                        |         | 53 neurotics           |  | 117.00               | 20.30       |         |                                    |

|              |                                                                 |                      |                                                                                               |                                      |                                                                                                                                                               |                                  |                          |                                         |
|--------------|-----------------------------------------------------------------|----------------------|-----------------------------------------------------------------------------------------------|--------------------------------------|---------------------------------------------------------------------------------------------------------------------------------------------------------------|----------------------------------|--------------------------|-----------------------------------------|
| Sweden       | Patients and healthy controls                                   | Swedish              | 915 all<br>161 psychotherapy<br>427 waiting-list group<br>146 norm group<br>181 student group | 54 personal disorder<br>334 controls | 115.00<br>149.00                                                                                                                                              | 32.80<br>21.80                   | .91                      | Sandell R. 1998 <sup>106</sup>          |
| Sweden       | Treatment terminated patients                                   | Swedish              | 156                                                                                           |                                      | 119.48 <sup>e</sup><br>130.50 <sup>e</sup><br>153.41 <sup>e</sup><br>142.39 <sup>e</sup><br>129.34 <sup>e</sup><br>132.24 <sup>e</sup><br>135.43 <sup>e</sup> | -<br>-<br>-<br>-<br>-<br>-<br>-  | .90                      | Sandell R. 2002 <sup>107</sup>          |
| Switzerland  | Injured accident victims                                        | German               | 106                                                                                           |                                      | 154.40                                                                                                                                                        | 20.60                            | .90                      | Schnyder U. 2001 <sup>108</sup>         |
| Switzerland  | Patients with rheumatoid arthritis and traffic accident victims | English<br>German    | 112 AV<br>89 RA                                                                               |                                      | 155.30<br>144.10                                                                                                                                              | 20.70<br>27.90                   |                          | Schnyder U. 1999 <sup>109</sup>         |
| Switzerland  | Accident victims aged 18-68 years                               | German               | 121                                                                                           |                                      | 155.30                                                                                                                                                        | 20.50                            | .89                      | Schnyder U. 2000 <sup>110</sup>         |
| Netherlands  | Dutch adults                                                    | Dutch                | 153                                                                                           |                                      | 135.75                                                                                                                                                        | 12.27                            | .89                      | Van Selim M. 1998 <sup>111</sup>        |
| China        | Public health nurses                                            | Chinese              | 20                                                                                            |                                      | 129.80                                                                                                                                                        | 20.70                            | .76                      | Shiu A.T.-Y. 1998 <sup>112</sup>        |
| USA          | College students                                                | English              | 270                                                                                           |                                      | 132.30 men                                                                                                                                                    | 21.10                            |                          | Skirka N. 2000 <sup>113</sup>           |
| USA          | Students                                                        | English              | 336                                                                                           |                                      | 134.30                                                                                                                                                        | 22.77                            | .87                      | Smith T.L. 1997 <sup>114</sup>          |
| USA          | College students                                                | English              | 156                                                                                           |                                      | 146.47                                                                                                                                                        | 22.14                            | .91                      | Strauser D. 2003 <sup>115</sup>         |
| South Africa | Nursing students, insurance employees and male artisan employed | English<br>Afrikaans | 118 students<br>88 insurance employee<br>117 artisans employed                                |                                      | [113]9.36 <sup>d</sup><br>145.82<br>139.65                                                                                                                    | 23.64<br>22.60<br>18.16          | .90<br>.91               | Strümpfer D.J.W. 1998 <sup>116</sup>    |
| Sweden       | Middle-aged women                                               | Swedish              | 450                                                                                           |                                      | 150.90                                                                                                                                                        | 23.40                            | .87                      | Svartvik L. 2000 <sup>117</sup>         |
| Sweden       | Middle-aged women                                               | Swedish              | 136                                                                                           |                                      | 150.90                                                                                                                                                        | 23.40                            |                          | Svartvik L. 2002 <sup>118</sup>         |
| Iceland      | Parents of children with asthma                                 | Icelandic            | 76 families                                                                                   |                                      |                                                                                                                                                               |                                  | .92                      | Svavarsdóttir E.K. 2000 <sup>119</sup>  |
| Iceland      | Parents of children with asthma                                 | Icelandic            | 103 Icelandic                                                                                 |                                      |                                                                                                                                                               |                                  | .86, .91                 | Svavarsdóttir E.K. 2003 <sup>120</sup>  |
| USA          | Parents of children with asthma                                 | English              | 76 American                                                                                   |                                      | 127.00                                                                                                                                                        | 27.50                            | .92                      | Söderberg S. 2001 <sup>121</sup>        |
| Sweden       | Patients with chronic fatigue syndrome                          | Swedish              | 14                                                                                            |                                      | 150.00                                                                                                                                                        | 17.00                            |                          | Tedgård U. 1999 <sup>122</sup>          |
| Sweden       | Carriers of haemophilia and their spouses                       | Swedish              | 29 women<br>23 men                                                                            |                                      | 158.00                                                                                                                                                        | 17.00                            |                          | Tedgård U. 1999 <sup>123</sup>          |
| Sweden       | Carriers of haemophilia                                         | Swedish              | 367 total<br>50 prenatal diagnosis<br>55 carriers                                             |                                      | 150.00                                                                                                                                                        | 20.00                            | .90                      |                                         |
| Sweden       | Nursing students                                                | Swedish              | 262 controls                                                                                  |                                      | 146.00                                                                                                                                                        | 23.00                            | .70                      | Thorell-Ekstrand L. 1993 <sup>124</sup> |
| Australia    | Women with perinatal bereavement                                | English              | 95                                                                                            |                                      | 128.76 <sup>e</sup>                                                                                                                                           | -<br>-                           |                          | Uren T.H. 2002 <sup>125</sup>           |
| South-Africa | Multicultural group of subjects                                 | Afrikaans            | 550 total<br>306 women<br>244 men<br>292 White                                                |                                      | 136.52<br>134.07<br>139.57<br>139.18                                                                                                                          | 21.68<br>21.83<br>21.18<br>21.91 | .85<br>.85<br>.86<br>.90 | Wissing M. 2002 <sup>126</sup>          |

| Country | Sample                                  | Language | N                    | Mean         | SD    | $\alpha$ | First author                        |
|---------|-----------------------------------------|----------|----------------------|--------------|-------|----------|-------------------------------------|
| USA     | Nondiabetic older adults                | English  | 258 Black            | 133.49       | 21.10 | .80      | Zhang J. 2001 <sup>127</sup>        |
|         |                                         |          | 142 total            |              |       | .92      |                                     |
|         |                                         |          | 73 spouses           | 141.90 women | 26.30 |          |                                     |
|         |                                         |          |                      | 141.20 women | 24.60 |          |                                     |
|         |                                         |          |                      | 158.60 men   | 17.40 |          |                                     |
|         |                                         |          |                      | 158.90 men   | 17.80 |          |                                     |
|         |                                         |          | 60 controls          | 160.50 women | 22.10 |          |                                     |
|         |                                         |          |                      | 159.90 women | 21.70 |          |                                     |
|         |                                         |          |                      | 164.50 men   | 17.10 |          |                                     |
|         |                                         |          |                      | 161.70 men   | 15.50 |          |                                     |
| USA     | Chinese Americans                       | Chinese  | 15                   | 146.70       | 24.30 |          | Ying Y.-W. 1999 <sup>138</sup>      |
|         |                                         |          |                      | 155.50       | 21.50 |          |                                     |
|         |                                         |          |                      | 153.10       | 21.80 |          |                                     |
| USA     | Chinese American undergraduate students | English  | 353 all              | 127.55       | 21.37 | .89      | Ying Y.-W. 2000 <sup>129, 130</sup> |
|         |                                         |          | 122 American-born    | 129.20       | 20.15 |          |                                     |
|         |                                         |          | 231 Immigrants       | 126.68       | 21.98 | .90      |                                     |
|         |                                         |          | 121 Early immigrants | 125.42       | 21.97 |          |                                     |
|         |                                         |          | 110 Late immigrants  | 128.06       | 22.01 |          |                                     |
|         |                                         |          | 642 all              | 129.35       | 21.74 | .90      |                                     |
|         |                                         |          | 291 Asian            | 125.43       | 20.28 |          |                                     |
|         |                                         |          | 197 White            | 133.47       | 22.34 |          |                                     |
|         |                                         |          | 20 African           | 129.40       | 19.80 |          |                                     |
|         |                                         |          | 67 Hispanic          | 131.31       | 23.07 |          |                                     |
|         |                                         |          | 56 Multiracial       | 132.80       | 23.05 |          |                                     |

<sup>a)</sup> visual analogue scale (VAS) 100 mm; <sup>b)</sup> visual analogue scale (VAS) 60 mm; <sup>c)</sup> visual analogue scale (VAS) 60 mm and 7-point Likert scale; <sup>d)</sup> printer's error corrected by personal communication with the author; <sup>e)</sup> here multiplied by .29; <sup>f)</sup> SD cannot be corrected. 1 = time

Table 3. Statistical data from studies using the SOC-13 questionnaire published 1992-2003

| Country     | Sample                            | Language | N            | Mean  | SD    | $\alpha$ | First author                       |
|-------------|-----------------------------------|----------|--------------|-------|-------|----------|------------------------------------|
| Switzerland | Adults aged 55-65 years           | German   | 1119 Swiss   | 51.30 |       |          | Abel T. 1999 <sup>132</sup>        |
| Germany     |                                   |          | 780 German   | 50.00 |       |          |                                    |
| Sweden      | Pregnant women                    | Swedish  | 395 total    | 71.80 | 10.90 |          | Abrahamsson A. 2002 <sup>133</sup> |
| USA         | College students aged 16-58 years | English  | 112          | 62.40 | 10.89 | .85      | Adams T.B. 2000 <sup>134</sup>     |
| Canada      | Canadians aged 20-24 years        | English  | 1395         | 54.18 | 12.42 |          | Allison K.R. 1999 <sup>135</sup>   |
| Sweden      | Managers and controls             | Swedish  | 68 managers  | 72.30 | 1.00  |          | Anderzén I. 1997 <sup>136</sup>    |
|             |                                   |          | 39 controls  | 71.30 | 1.50  |          |                                    |
| Sweden      | Employees and                     | Swedish  | 47 employees | 72.70 | 1.36  | .82      | Anderzén I. 1999 <sup>137</sup>    |



|                |                                                         |            |                                               |                                                              |                            |          |  |  |                                           |
|----------------|---------------------------------------------------------|------------|-----------------------------------------------|--------------------------------------------------------------|----------------------------|----------|--|--|-------------------------------------------|
| Norway         | controls                                                | Norwegian  | 35 controls                                   | 71.90                                                        | 1.58                       |          |  |  |                                           |
| Norway         | Patients with multiple trauma                           | Norwegian  | 69                                            | 60.00                                                        | 13.00                      |          |  |  | Anke A. 2003 <sup>138</sup>               |
| Israel         | Women married to army members and civilians             | Hebrew     | 44 married                                    | 68.10                                                        | 13.30                      |          |  |  | Anson O. 1993 <sup>139</sup>              |
| Israel         | Patients with mild hypertension                         | Hebrew     | 53 civilians                                  | 71.90                                                        | 8.20                       |          |  |  |                                           |
| Israel         |                                                         | Hebrew     | 238                                           | 67.90 men<br>58.90 women                                     |                            | .74      |  |  | Anson O. 1993 <sup>140</sup>              |
| Israel         | Kibbutz members                                         | Hebrew     | 230 total                                     | 68.67                                                        | 9.90                       |          |  |  | Anson O. 1993 <sup>141</sup>              |
| United Kingdom | Social workers                                          | English    | 105 religious                                 | 66.43                                                        | 10.00                      |          |  |  |                                           |
| Norway         | Substance abusers                                       | English    | 125 nonreligious                              | 64.00                                                        | 11.00                      |          |  |  | Baker M. 1997 <sup>142</sup>              |
| USA            | Older males                                             | Norwegian  | 78                                            | 64.00                                                        |                            |          |  |  | Berg J.E. 1998 <sup>143</sup>             |
| Switzerland    | Adolescents aged 16-20 years                            | English    | 61 all                                        | 40.30 <sup>f</sup>                                           | 0.14 <sup>f</sup>          |          |  |  | Brooks J. 1998 <sup>144</sup>             |
| Switzerland    |                                                         | German     | 43 completers                                 | 35.49 <sup>f</sup>                                           | 0.10 <sup>f</sup>          |          |  |  | Buddenberg-Fischer B. 2001 <sup>145</sup> |
| Switzerland    |                                                         | German     | 18 non-compl                                  | 70.60                                                        | 10.70                      |          |  |  |                                           |
| Switzerland    |                                                         | German     | 199                                           | 60.71 <sup>f</sup>                                           | - <sub>h</sub>             | .82      |  |  |                                           |
| Switzerland    |                                                         | German     | 341                                           | 61.62 <sup>f</sup>                                           | - <sub>h</sub>             | .82-.87  |  |  |                                           |
| Switzerland    | Patients with SLE                                       | German     | 60                                            | 65.00                                                        | 11.00                      |          |  |  | Büchi S. 2000 <sup>146</sup>              |
| China          | Han Chinese adults                                      | Chinese    | 197                                           |                                                              |                            | .74      |  |  | Cai D. 1998 <sup>147</sup>                |
| USA            | Patients with rheumatoid arthritis                      | English    | 828                                           | 65.30                                                        | 14.80                      |          |  |  | Callahan L. 1995 <sup>20</sup>            |
| USA            | Family caregivers of memory-impaired individuals        | English    | 305 all                                       | 68.70                                                        | 12.70                      |          |  |  | Chumbler N. 2003 <sup>148</sup>           |
| USA            |                                                         | English    | 211 female                                    | 69.30                                                        | 12.50                      | .75      |  |  |                                           |
| USA            |                                                         | English    | 94 male                                       | 67.50                                                        | 13.20                      |          |  |  |                                           |
| United Kingdom | Adults with cleft lip                                   | English    | 51                                            | 60.17                                                        | 12.50                      |          |  |  | Cochrane W. 1999 <sup>149</sup>           |
| USA            | Clinic patients (elderly Veterans)                      | English    | 194                                           | 69.10                                                        | 17.49                      |          |  |  | Coe R.M. 1992 <sup>150</sup>              |
| USA            | Elderly people                                          | English    | 152                                           | 62.00                                                        | 9.80                       | .87      |  |  | Coward D.D. 1996 <sup>151</sup>           |
| Denmark        | General population                                      | Danish     | 2352                                          | 65.00                                                        | 11.00                      | .85      |  |  | Due E.P. 1998 <sup>152</sup>              |
| South Africa   | Sawmill workers                                         | Afrikaans  | 51                                            | 61.66                                                        | 12.10                      |          |  |  | Edwards D. 2001 <sup>153</sup>            |
| Sweden         | Patients with schizophrenia                             | Swedish    | 74                                            | 45.50 <sup>f</sup> employed<br>53.30 <sup>f</sup> unemployed | - <sub>h</sub>             |          |  |  | Eklund M. 2001 <sup>154</sup>             |
| Sweden         | Elderly people and healthy controls                     | Swedish    | 94 patients                                   | 72.40                                                        | 8.90                       |          |  |  | Ekman I. 2002 <sup>155</sup>              |
| Finland        | Older population > 75 years old                         | Finnish    | 94 controls                                   | 73.60                                                        | 8.70                       |          |  |  |                                           |
| Finland        | Technical designers                                     | Finnish    | 348                                           | 71.50 <sup>f</sup>                                           | - <sub>h</sub>             | .89      |  |  | Flovaainio M. 2000 <sup>156</sup>         |
| Finland        | Employees                                               | Finnish    | 989                                           | 63.10                                                        | 11.90                      | .82      |  |  | Feldt T. 2000 <sup>157</sup>              |
| Finland        | 25-29-year-aged and 35-40 year-aged technical designers | Finnish    | 219                                           | 63.90-64.50                                                  |                            | .84, .85 |  |  | Feldt T. 2003 <sup>158</sup>              |
| Canada         | Young old (65-79) and old-old (80+) people              | English    | 352 total<br>141 younger age<br>211 older age | 61.70-65.30<br>61.00-65.70                                   | 12.40-11.20<br>11.80-10.80 | .82, .87 |  |  | Forbes D.A. 2001 <sup>159</sup>           |
| Sweden         | Patients with cancer                                    | Swedish    | 2006 young-old<br>406 old-old                 | 63.48<br>63.92                                               | 10.99<br>11.01             |          |  |  | Forsberg C. 1996 <sup>160</sup>           |
| Brazil         | 15-year-olds schoolchildren and                         | Portuguese | 79                                            | 57.50                                                        |                            | .81      |  |  | Freire M.C. 2001 <sup>161</sup>           |

|           |                                                                    |                                          |                                                                             |                                                      |                                  |                                                        |
|-----------|--------------------------------------------------------------------|------------------------------------------|-----------------------------------------------------------------------------|------------------------------------------------------|----------------------------------|--------------------------------------------------------|
| Brazil    | their mothers<br>15-year-olds schoolchildren and their mothers     | (Brazilian)<br>Portuguese<br>(Brazilian) | 664                                                                         | 63.90 mothers                                        | 13.40                            | Freire M.C. 2002 <sup>162</sup>                        |
| France    | French adults                                                      | French                                   | 647                                                                         |                                                      |                                  | Gana K. 2001 <sup>51</sup>                             |
| Australia | Patients with arthritis and healthy controls                       | English                                  | 375 total<br>116 AFV-support<br>93 without supp<br>166 controls             | 63.40<br>60.30<br>62.90<br>67.10                     | 15.30<br>17.40<br>15.50<br>13.10 | Germano D 2001 <sup>163</sup>                          |
| USA       | Field-workers                                                      | English                                  | 158 home health<br>55 nurses<br>400 nurses<br>40 soc workers                | 65.06<br>70.18<br>70.03<br>73.80                     | 12.80<br>11.79<br>10.05<br>8.91  | George V. 1996 <sup>164</sup>                          |
| Greece    | Male conscripts                                                    | Greek                                    | 1098                                                                        | 59.75                                                | 10.80                            | Gioukatos O. 2003 <sup>165</sup>                       |
| USA       | Single mothers of disabled children                                | English                                  | 152                                                                         | 59.90                                                | 14.00                            | Gottlieb A. 1998 <sup>166</sup>                        |
| Canada    | Persons aged 65 or older                                           | English                                  | 826                                                                         | 79.30 <sup>f</sup>                                   | - <sup>i</sup>                   | Graham K. 1998 <sup>167</sup>                          |
| Norway    | Patients with angina pectoris                                      | Norwegian                                | 589                                                                         | 71.16 <sup>a</sup>                                   | 21.20                            | Guldvog B. 1999 <sup>168</sup>                         |
| Finland   | Nurse educators                                                    | Finnish                                  | 477                                                                         | 66.90 <sup>a</sup>                                   | 0.47                             | Harti M. 1998 <sup>169</sup>                           |
| Finland   | General population                                                 | Finnish                                  | 3403                                                                        |                                                      |                                  | Hassmén P. 2000 <sup>170</sup>                         |
| Sweden    | Parents with Down Syndrom-children and controls                    | Swedish                                  | 334 total<br>165 DS<br>86 mothers<br>79 fathers                             | 67.30<br>69.20                                       | 12.00 ns<br>10.30 ns             | Hedov G. 2002 <sup>171</sup>                           |
| Sweden    | Employed women aged 18-64 years                                    | Swedish                                  | 1075                                                                        |                                                      | 11.80 ns                         | Hensing G. 2000 <sup>172</sup>                         |
| Sweden    | Patients with Ménière's disease and controls                       | Swedish                                  | 112 patients<br>268 controls                                                | 68.70<br>66.00                                       | 13.80<br>12.00                   | Hessén Söderman A-C. 2001,<br>2002 <sup>173, 174</sup> |
| Canada    | Healthy people                                                     | English                                  | 16291                                                                       |                                                      | 10.00 ns                         | Hood S.C. 1996 <sup>175</sup>                          |
| USA       | Homeless women and low-income housed women                         | English                                  | 113 homeless<br>116 housed                                                  | 50.45<br>55.66                                       | 14.34<br>12.59                   | Ingram K. 1996 <sup>176</sup>                          |
| Sweden    | Men with prostate cancer and men with benign prostatic hyperplasia | Swedish                                  | 71 cancer patient<br>37 BPH                                                 | 75.10<br>76.50                                       | 13.20<br>10.90                   | Jakobsson L. 2002 <sup>177</sup>                       |
| Sweden    | Former workers at Volvo Kalmar plant                               | Swedish                                  | 344                                                                         | 66.50 women<br>67.90 men                             | 12.05<br>12.24                   | Johansson Hansé J. 1999 <sup>178</sup>                 |
| Sweden    | Ambulance personnel                                                | Swedish                                  | 362                                                                         | 67.72                                                |                                  | Jonsson A. 2003 <sup>179</sup>                         |
| Finland   | Unemployed with disabilities and controls                          | Finnish                                  | 137 non-traumatic events<br>223 traumatic events<br>88 disabili<br>88 contr | 69.90 men<br>70.54 women<br>65.57 men<br>66.30 women | 8.57<br>9.72<br>10.30<br>9.93    | Juononen-Posti P. 2002 <sup>180</sup>                  |

|             |                                                                 |         |                     |                                                                     |                |         |                                       |
|-------------|-----------------------------------------------------------------|---------|---------------------|---------------------------------------------------------------------|----------------|---------|---------------------------------------|
| Finland     | Employees                                                       | Finnish | 2144                | 63.96 <sup>f</sup> <sub>11</sub> , 67.73 <sup>f</sup> <sub>12</sub> | - <sup>j</sup> | .84-.87 | Katimo R. 2002 <sup>181</sup>         |
| Finland     | Employees                                                       | Finnish | 174 all             |                                                                     |                |         | Katimo R. 2003 <sup>182</sup>         |
| Sweden      | Patients attended cardiac rehabilitation                        | Swedish | 87 no-burnout       | 67.99 <sup>f</sup> <sub>11</sub> , 70.85 <sup>f</sup> <sub>12</sub> |                |         | Kanwendo K. 1998 <sup>183</sup>       |
| Sweden      | Patients with coronary heart disease                            | Swedish | 87 serious burnout  | 53.17 <sup>f</sup> <sub>11</sub> , 49.27 <sup>f</sup> <sub>12</sub> |                |         | Karlsson I. 2000 <sup>184</sup>       |
| Sweden      | Patients with coronary heart disease                            | Swedish | 79                  | 62.40                                                               | 12.60          | .84     | Karlsson I. 2000 <sup>184</sup>       |
| Sweden      | Patients after coronary artery bypass grafting                  | Swedish | 111                 | 69.50 <sub>11</sub>                                                 |                | .88     | Karlsson I. 2002 <sup>201</sup>       |
| Denmark     | Male industrial managers                                        | Danish  | 111                 | 66.00                                                               | 13.00          | .84-.88 | Karlsson I. 2002 <sup>201</sup>       |
| Finland     | Municipal employees                                             | Finnish | 102                 | 66.00                                                               | 14.00          | .75     | Kivimäki M. 1998 <sup>185</sup>       |
| Finland     | Accident victims                                                | Finnish | 750                 | 67.99 <sup>f</sup>                                                  | - <sup>b</sup> | .83     | Kivimäki M. 2002 <sup>186</sup>       |
| Switzerland | Patients with chronic renal failure                             | German  | 2991                | 64.61 <sup>f</sup> women                                            | - <sup>b</sup> |         | Kjaer Fuglsang A. 2002 <sup>187</sup> |
| Sweden      | Patients with chronic renal failure                             | Swedish | 323                 | 64.09 <sup>f</sup> men                                              | - <sup>b</sup> |         | Klang B. 1996 <sup>188</sup>          |
| Sweden      | Predialytic uremic patients and healthy reference group         | Swedish | 48 all              | 66.30 <sup>f</sup>                                                  | - <sup>j</sup> | .76     | Klang B. 1996 <sup>188</sup>          |
| Sweden      | Uraemic patients and controls                                   | Swedish | 25 predialysis      | 66.00                                                               | 10.30          | .76     | Klang B. 1996 <sup>189</sup>          |
| Sweden      | Uraemic patients and controls                                   | Swedish | 23 dialysis         | 71.40                                                               | 13.60          | .75     | Klang B. 1996 <sup>189</sup>          |
| Sweden      | Uraemic patients and controls                                   | Swedish | 38 patients         | 66.80                                                               | 11.20          | .76     | Klang B. 1996 <sup>189</sup>          |
| Sweden      | Uraemic patients and controls                                   | Swedish | 268 reference group | 65.70                                                               | 12.00          | .82     | Klang B. 1999 <sup>190</sup>          |
| Sweden      | Uraemic patients and controls                                   | Swedish | 28                  | 66.00 predialysis                                                   | 13.00          | .82     | Klang B. 1999 <sup>190</sup>          |
| Sweden      | Uraemic patients and controls                                   | Swedish | 71.00 dialysis      | 71.00 dialysis                                                      | 12.00          | .88     | Klang B. 1999 <sup>190</sup>          |
| Sweden      | Uraemic patients and controls                                   | Swedish | 65.00 dialysis      | 65.00 dialysis                                                      | 10.00          | .88     | Klang B. 1999 <sup>190</sup>          |
| Colombia    | Detained offenders                                              | Spanish | 28                  |                                                                     |                |         | Klevens J. 2000 <sup>191</sup>        |
| Sweden      | Patients with chronic lower limb ischaemia and healthy controls | Swedish | 223                 |                                                                     |                |         | Klevens J. 2000 <sup>191</sup>        |
| Sweden      | Patients with chronic lower limb ischaemia and healthy controls | Swedish | 270 all             |                                                                     |                |         | Klevens J. 2000 <sup>191</sup>        |
| Sweden      | Patients with chronic lower limb ischaemia and healthy controls | Swedish | 75 ischaemia        | 71.00                                                               | 13.80          | .87     | Klevens J. 2000 <sup>191</sup>        |
| Sweden      | Patients with chronic lower limb ischaemia and healthy controls | Swedish | 93 claudicants      | 72.00                                                               | 13.60          | .87     | Klevens J. 2000 <sup>191</sup>        |
| Sweden      | Patients with chronic lower limb ischaemia and healthy controls | Swedish | 102 controls        | 75.00                                                               | 10.50          | .87     | Klevens J. 2000 <sup>191</sup>        |
| Sweden      | Patients with chronic lower limb ischaemia and healthy controls | Swedish | 397                 |                                                                     |                |         | Klevens J. 2000 <sup>191</sup>        |
| Sweden      | Patients with chronic lower limb ischaemia and healthy controls | Swedish | 150                 | 68.80                                                               | 0.90           | .77     | Krantz G. 2000 <sup>193</sup>         |
| Sweden      | Patients with chronic lower limb ischaemia and healthy controls | Swedish | 159                 | 62.50                                                               | 0.90           | .86     | Kristenson M. 1998 <sup>194</sup>     |
| Sweden      | Patients with chronic lower limb ischaemia and healthy controls | Swedish | 201                 |                                                                     |                |         | Kristenson M. 1998 <sup>194</sup>     |
| Sweden      | Patients with chronic lower limb ischaemia and healthy controls | Swedish | 203                 |                                                                     |                |         | Kristenson M. 1998 <sup>194</sup>     |
| Sweden      | Patients with chronic lower limb ischaemia and healthy controls | Swedish | 145                 | 61.00                                                               | 9.00           | .77     | Läjunen T. 1998 <sup>195</sup>        |
| Sweden      | Patients with chronic lower limb ischaemia and healthy controls | Swedish | 268 controls        | 66.00                                                               | 12.00          | .86     | Läjunen T. 1998 <sup>195</sup>        |
| Sweden      | Patients with chronic lower limb ischaemia and healthy controls | Swedish | 38 kidney disease   | 67.00                                                               | 11.00          | .76     | Langius A. 1993 <sup>65</sup>         |
| Sweden      | Patients with chronic lower limb ischaemia and healthy controls | Swedish | 96 cancer patients  | 70.00                                                               | 11.00          | .78     | Langius A. 1996 <sup>67</sup>         |
| Sweden      | Patients with chronic lower limb ischaemia and healthy controls | Swedish | 19 cancer patients  | 67.00                                                               | 12.00          | .79     | Langius A. 1996 <sup>67</sup>         |
| Sweden      | Patients with chronic lower limb ischaemia and healthy controls | Swedish | 2003                |                                                                     |                |         | Langius A. 1996 <sup>67</sup>         |
| Sweden      | Patients with chronic lower limb ischaemia and healthy controls | Swedish | 64.02 women         |                                                                     | 11.36          | .82     | Larsson G. 1996 <sup>196</sup>        |
| Sweden      | Patients with chronic lower limb ischaemia and healthy controls | Swedish | 65.04 men           |                                                                     | 10.39          | .82     | Larsson G. 1996 <sup>196</sup>        |
| Sweden      | Patients with chronic lower limb ischaemia and healthy controls | Swedish | 1906                | 64.52                                                               | 11.03          | .82     | Larsson G. 1999 <sup>197</sup>        |
| Sweden      | Patients with chronic lower limb ischaemia and healthy controls | Swedish | 1901                | 65.31                                                               | 10.64          | .82     | Larsson G. 1999 <sup>197</sup>        |
| Sweden      | Patients with chronic lower limb ischaemia and healthy controls | Swedish | 510                 | 65.13 poor mental                                                   | 10.34          | .80     | Larsson G. 2000 <sup>198</sup>        |

|              |                                                                            |           |                                                |  | health                                    | 70.04 no poor mental health | 8.91    |                                      |
|--------------|----------------------------------------------------------------------------|-----------|------------------------------------------------|--|-------------------------------------------|-----------------------------|---------|--------------------------------------|
| Sweden       | Patients                                                                   | Swedish   | 1056                                           |  |                                           |                             | .84     | Larsson Wilde B. 1999 <sup>199</sup> |
| USA          | Chinese, Japanese and American adults                                      | English   | 160 Americans                                  |  | .82 <sup>c</sup> , .84 <sup>a</sup> , .85 |                             |         | Lee J.W. 2002 <sup>200</sup>         |
|              |                                                                            | Japanese  | 323 Japanese                                   |  | .85 <sup>c</sup> , .77 <sup>a</sup> , .86 |                             |         |                                      |
|              |                                                                            | Chinese   | 136 Chinese                                    |  | .75 <sup>c</sup> , .78 <sup>a</sup> , .78 |                             |         |                                      |
| South Africa | Psychiatric nurses                                                         | English   | 94                                             |  |                                           |                             | .75     | Levert T. 2000 <sup>201</sup>        |
| USA          | Older adults and controls                                                  | English   | 30 adults                                      |  | 60.61                                     |                             | 12.40   | Lutendorf S.K. 1999 <sup>202</sup>   |
|              |                                                                            | English   | 28 controls                                    |  | 75.43                                     |                             | 8.55    |                                      |
| USA          | Employees                                                                  | English   | 728                                            |  | 75.30                                     |                             | 9.53    |                                      |
| Sweden       | Patients treated with noninvasive and invasive home mechanical ventilation | Swedish   | 31 trach                                       |  | 62.50                                     |                             | 12.56   | Mackie K.S. 2001 <sup>203</sup>      |
| Japan        | Patients with Scleroderma                                                  | Japanese  | 60 NIV                                         |  | 70.70                                     |                             | 15.50   | Markström A. 2002 <sup>204</sup>     |
| Norway       | Male conscripts                                                            | Norwegian | 663                                            |  | 66.80                                     |                             | 13.80   |                                      |
| Sweden       | Unemployed with a somatic disorder                                         | Swedish   | 109                                            |  | 67.70                                     |                             | 13.40   | Matsuura E. 2002 <sup>205</sup>      |
| Sweden       | Patients with peripheral vestibular disorder and controls                  | Swedish   | 99 patients                                    |  | 59.50                                     |                             | 11.60   | Mehlum L. 1998 <sup>206</sup>        |
| USA          | Persons with CHD survived cardiac arrest                                   | English   | 268 controls                                   |  | 71.00                                     |                             | 12.00   | Melin R. 2003 <sup>207</sup>         |
| USA          | Women with IBS and healthy controls                                        | English   | 149                                            |  | 66.00                                     |                             | 12.95   | Mendel B. 2001 <sup>208</sup>        |
|              |                                                                            | English   | 324 all                                        |  | 69.21                                     |                             | .87     | Motzer S. 1996 <sup>209</sup>        |
|              |                                                                            | English   | 235 IBS                                        |  | 61.58                                     |                             | 13.00   | Motzer Adams S. 2003 <sup>209</sup>  |
|              |                                                                            | English   | 89 controls                                    |  | 67.36                                     |                             | 12.33   |                                      |
| Japan        | Civil servants                                                             | Japanese  | 1595 all                                       |  |                                           |                             | .83     | Nisernoaddeli A. 2002 <sup>210</sup> |
|              |                                                                            | Japanese  | 698 women                                      |  | 52.80                                     |                             | 10.20   |                                      |
|              |                                                                            | Japanese  | 897 men                                        |  | 54.70                                     |                             | 10.40   |                                      |
| Japan        | Civil servants                                                             | Japanese  | 1300 all                                       |  |                                           |                             | .83     | Nisernoaddeli A. 2003 <sup>211</sup> |
|              |                                                                            | Japanese  | 564 women                                      |  | 53.10                                     |                             | 10.20   |                                      |
|              |                                                                            | Japanese  | 736 men                                        |  | 54.70                                     |                             | 10.40   |                                      |
| Sweden       | General population                                                         | Swedish   | 1802                                           |  | 70.80 women                               |                             | 10.40   | Nilsson B. 2000 <sup>84</sup>        |
| Sweden       | General population                                                         | Swedish   | 1254                                           |  | 70.50 men                                 |                             | 9.90    |                                      |
|              |                                                                            | Swedish   | 70.83 <sub>11</sub> , 68.87 <sub>2</sub>       |  |                                           |                             |         | Nilsson B. 2003 <sup>212</sup>       |
|              |                                                                            | Swedish   | 70.92 <sub>11</sub> , 69.04 <sub>2</sub> women |  |                                           |                             |         |                                      |
|              |                                                                            | Swedish   | 70.73 <sub>11</sub> , 68.70 <sub>2</sub> men   |  |                                           |                             |         |                                      |
| Sweden       | Parents with children with intellectual disabilities and controls          | Swedish   | 755                                            |  | 67.00                                     |                             | 13.00   | Olsson M.B. 2002 <sup>215</sup>      |
|              |                                                                            | Swedish   | 259                                            |  | 64.40 mothers                             |                             | 14.50   |                                      |
|              |                                                                            | Swedish   | 109                                            |  | 69.10 fathers                             |                             | 11.90   |                                      |
|              |                                                                            | Swedish   | 59.90 mothers                                  |  |                                           |                             | .86-.87 |                                      |
|              |                                                                            | Swedish   | 65.20 fathers                                  |  |                                           |                             | 12.00   |                                      |
|              |                                                                            | Swedish   | 69.10 mothers                                  |  |                                           |                             | 10.80   |                                      |
|              |                                                                            | Swedish   | 69.50 fathers                                  |  |                                           |                             | 10.80   |                                      |
| Australia    | General population                                                         | English   | 439 all                                        |  | 60.80                                     |                             | 11.70   | Pallant J. 2002 <sup>214</sup>       |
|              |                                                                            | English   | 255 women                                      |  | 60.40                                     |                             | 12.05   |                                      |

|             |                                                           |                              |                                           |                                                                                                                                                                                                                             |                                                            |            |                                                                                                        |
|-------------|-----------------------------------------------------------|------------------------------|-------------------------------------------|-----------------------------------------------------------------------------------------------------------------------------------------------------------------------------------------------------------------------------|------------------------------------------------------------|------------|--------------------------------------------------------------------------------------------------------|
| Sweden      | Survivors of acute leukemia and highly malignant lymphoma | Swedish                      | 184 men                                   | 61.37                                                                                                                                                                                                                       | 11.23                                                      |            | Persson L., 1997 <sup>215</sup>                                                                        |
| USA         | Outpatients with solid tumors                             | English                      | 38                                        | 63.00-66.50                                                                                                                                                                                                                 |                                                            |            | Post-White J., 1998 <sup>216</sup>                                                                     |
| USA         | High school students                                      | English                      | 338                                       |                                                                                                                                                                                                                             |                                                            |            | Ryland E.K., 1998 <sup>217</sup>                                                                       |
| Sweden      | Adolescents and young adults with epilepsy and controls   | Swedish                      | 158 epilepsy<br>282 controls              | 64.05<br>63.73                                                                                                                                                                                                              | 13.15<br>12.07                                             | .84<br>.83 | Raty L., 2003 <sup>218</sup>                                                                           |
| Israel      | School children and their parents                         | Hebrew                       | 201                                       |                                                                                                                                                                                                                             |                                                            |            | Sagy S., 1998 <sup>219</sup>                                                                           |
| Israel      | Israeli Jewish adolescents                                | Hebrew                       | 107 Golan<br>91 Galilee                   | 55.32<br>54.92                                                                                                                                                                                                              | 9.30<br>10.11                                              |            |                                                                                                        |
| Sweden      | Patients with type-2 diabetes                             | Swedish                      | 266 acute stress<br>448 without a s<br>88 | 56.16 <sup>f</sup><br>58.11 <sup>f</sup><br>72.60                                                                                                                                                                           | - <sup>h</sup><br>- <sup>h</sup><br>11.90                  | .74<br>.73 | Sagy S., 2002 <sup>220</sup>                                                                           |
| Finland     | Adult patients                                            | Finnish                      | 71.00 women                               | 71.00 women                                                                                                                                                                                                                 | 11.70                                                      |            | Sanden-Eriksson B., 2000 <sup>221</sup>                                                                |
| Finland     | Adult patients                                            | Finnish                      | 80                                        | 73.90 men                                                                                                                                                                                                                   | 12.10                                                      |            |                                                                                                        |
| Israel      | Female students                                           | Hebrew                       | 85                                        | 65.00                                                                                                                                                                                                                       | 15.00                                                      | .90        | Santavirta N., 1996 <sup>222</sup>                                                                     |
| Finland     | Older population > 75 years old                           | Finnish                      | 54                                        | 64.60                                                                                                                                                                                                                       | 14.20                                                      | .92        | Santavirta N., 1996 <sup>223</sup>                                                                     |
| Switzerland | Accident victims and patients with RA                     | Finnish<br>English<br>German | 300<br>96                                 | 61.26<br>65.00<br>68.22 <sup>1</sup><br>65.33 <sup>2</sup><br>65.90 <sup>3</sup><br>66.87 <sup>1</sup><br>68.89 <sup>2</sup><br>58.00                                                                                       | 8.96<br>11.57<br>11.87<br>12.66<br>11.59<br>13.47<br>14.00 | .75<br>.78 | Sarid O., 2003 <sup>224</sup><br>Sarvimäki A., 1994 <sup>225</sup><br>Schnyder U., 2000 <sup>110</sup> |
| Sweden      | Patients with chronic pain                                | Swedish                      | 84                                        |                                                                                                                                                                                                                             |                                                            | .80        | Schult M-L., 2000 <sup>226</sup>                                                                       |
| USA         | Later life family units                                   | English                      | 184                                       |                                                                                                                                                                                                                             |                                                            | .78        | Smith S.D., 1997 <sup>227</sup>                                                                        |
| Canada      | Canadian labour force                                     | English                      | 6790                                      | 58.43 <sup>h</sup> <sub>11</sub> , 62.01 <sup>h</sup> <sub>12</sub><br>57.65 <sup>h</sup> <sub>11</sub> , 61.70 <sup>h</sup> <sub>12</sub> women<br>59.08 <sup>h</sup> <sub>11</sub> , 62.27 <sup>h</sup> <sub>12</sub> men | 11.76<br>11.47<br>10.73<br>12.00<br>10.92                  | .83        | Smith P., 2003 <sup>228</sup>                                                                          |
| Norway      | Patients with severe multiple trauma                      | Norwegian                    | 26                                        | 63.00 <sup>1</sup> <sub>11</sub><br>68.00 <sup>1</sup> <sub>12</sub><br>65.00 <sup>1</sup> <sub>11</sub>                                                                                                                    |                                                            | .86-.89    | Snekkevik H., 2003 <sup>229</sup>                                                                      |
| Israel      | Mothers/immigrants from the former Soviet Union           | Russian                      | 221 single<br>241 couple                  | 60.60<br>63.40                                                                                                                                                                                                              | 12.50<br>12.30                                             | .77        | Soskolne V., 2001 <sup>230</sup>                                                                       |
| Israel      | Patients with irritable bowel syndrome (IBS)              | Hebrew                       | 151 all<br>79 IBS                         | 59.60                                                                                                                                                                                                                       | 1.10                                                       |            | Sperber A., 1999 <sup>231</sup>                                                                        |
| Sweden      | Unemployed people                                         | Swedish                      | 72 controls                               | 65.70                                                                                                                                                                                                                       | 1.20                                                       |            | Starrin B., 2001 <sup>232</sup>                                                                        |
| USA         | Older people                                              | English                      | 414                                       | 55.19 women<br>54.41 men                                                                                                                                                                                                    | 14.26<br>14.10                                             | .77        | Steiner A., 1996 <sup>233</sup>                                                                        |
| Canada      | Population aged 18 and older                              | English                      | 50 controls<br>19818                      | 77.60<br>72.60                                                                                                                                                                                                              | 13.80<br>13.60                                             | .78        | Stephens T., 1999 <sup>234</sup>                                                                       |

| Country         | Sample                                                    | Language             | Items                          | Scales | N | Mean                     | SD         | $\alpha$                          | First author                           |
|-----------------|-----------------------------------------------------------|----------------------|--------------------------------|--------|---|--------------------------|------------|-----------------------------------|----------------------------------------|
| South African   | Working adults                                            | English<br>Afrikaans | 152                            |        |   | 12.15                    | .84        |                                   | Sturmlper D. 2001 <sup>235</sup>       |
| Finland         | General population                                        | Finnish              | 20101 total                    |        |   |                          |            |                                   | Suominen S. 2002 <sup>236</sup>        |
|                 |                                                           |                      | 9151 good health               | 67.08  |   |                          |            |                                   |                                        |
|                 |                                                           |                      | 7802 fairly good h             | 62.91  |   |                          |            |                                   |                                        |
|                 |                                                           |                      | 3185 mediocre h                | 59.84  |   |                          |            |                                   |                                        |
|                 |                                                           |                      | 688 fairly poor h              | 56.34  |   |                          |            |                                   |                                        |
| 171 poor health | 52.92                                                     |                      |                                |        |   |                          |            |                                   |                                        |
| Norway          | Patients with Gallbladder Stones disease                  | Norwegian            | 28                             |        |   | 19.80                    |            | Svebak S. 2000 <sup>237</sup>     |                                        |
| Sweden          | Employees of social-welfare and social-insurance agencies | Swedish              | 103                            |        |   | 66.00 women<br>67.00 men |            | Söderfeldt M. 2000 <sup>238</sup> |                                        |
| Finland         | Elderly people                                            | Finnish              | 78                             |        |   | 10.42-11.35              | .70        |                                   | Takkinen S. 2001 <sup>239</sup>        |
|                 |                                                           |                      | 182                            |        |   |                          |            |                                   |                                        |
| USA             | Chinese bilingual students                                | English<br>Chinese   | 299                            |        |   | 69.90-71.90              | .79        |                                   | Tang S. T. 2002 <sup>240</sup>         |
|                 |                                                           |                      | 70                             |        |   | 60.90<br>60.70           | .88<br>.89 |                                   |                                        |
| Finland         | Industrial design personnel                               | Finnish              | 422                            |        |   | 64.87 <sup>f</sup>       | .83        |                                   | Toppinen-Tanner S. 2003 <sup>241</sup> |
| Norway          | Students                                                  | Norwegian            | 4731                           |        |   |                          |            |                                   | Torshelm T. 2001 <sup>242</sup>        |
| Greece          | Nurses                                                    | Greek                | 79 all<br>17 male<br>62 female |        |   | 11.70<br>12.00<br>11.56  |            |                                   | Tselchis A. 2001 <sup>243</sup>        |
| Norway          | Patients                                                  | Norwegian            | 5305                           |        |   | 63.60<br>67.10<br>62.63  |            |                                   | Veenstra M. 2002 <sup>244</sup>        |
| Australia       | Older people                                              | English              | 556                            |        |   | 67.00                    | 13.00      |                                   | Wells Y.D. 1997 <sup>245</sup>         |
| Australia       | Retired individuals                                       | English              | 363                            |        |   | 70.47                    | 14.54      |                                   | Wells Y.D. 1999 <sup>246</sup>         |
| Sweden          | Cancer patients                                           | Swedish              | 20                             |        |   | 67.00                    | .79        |                                   | Wettersgren L. 1997 <sup>247</sup>     |
| Finland         | Physicians and architects                                 | Finnish              | 189 architects                 |        |   | 61.40-62.50              |            |                                   | Virtanen P. 2001 <sup>248</sup>        |
|                 |                                                           |                      | 638 physicians                 |        |   | 62.60-67.50              |            |                                   |                                        |
| Canada          | General population                                        | English              | 17626                          |        |   | 9.20- 9.90               | .83        |                                   | Wolff A.C. 1999 <sup>249</sup>         |
| Hong Kong       | Critical care nurses                                      | Chinese              | 35                             |        |   | 12.00                    | .79        |                                   | Yam B. 2003 <sup>250</sup>             |

<sup>b1</sup> visual analogue scale (VAS) 100 mm. <sup>c1</sup> 4-point Likert scale. <sup>d1</sup> 6-point Likert scale. <sup>e1</sup> 5 response choices. <sup>f1</sup> here multiplied by 13; <sup>g1</sup> SOC index transformed to range between 0 and 100; <sup>h1</sup> completed information by personal communication with the author; <sup>i1</sup> median; <sup>j1</sup> SD cannot be corrected, <sup>k1</sup> = time

Table 4. Statistical data from studies using modified versions of the SOC questionnaire published 1992-2003.



|             |                                                     |                  |        |                             |                                                    |                                                                                                                                  |                                                                                    |                                      |
|-------------|-----------------------------------------------------|------------------|--------|-----------------------------|----------------------------------------------------|----------------------------------------------------------------------------------------------------------------------------------|------------------------------------------------------------------------------------|--------------------------------------|
| Canada      | Women aged 20-64 years                              | English          | SOC-13 | 7-point Likert (0-6 points) | 6748                                               | 57.70                                                                                                                            | .83                                                                                | Ing J. 2003 <sup>271</sup>           |
| Norway      | Persons with CP and without intellectual disability | Norwegian        | 3      | 3-point Likert              | 406                                                | 2.01                                                                                                                             |                                                                                    | Jahnsen R. 2002 <sup>272</sup>       |
| Sweden      | Older patients                                      | Swedish          | 9      | 3 choices                   | All<br>53                                          | 1.51                                                                                                                             | .74                                                                                | Johansson L. 1994 <sup>273</sup>     |
| Norway      | 13-15 year-aged schoolchildren                      | Norwegian        | 13     | 5 choices                   | Group 1 25<br>Group 2 17<br>Group 3 8              | 2.27<br>1.99<br>2.08                                                                                                             | 0.30<br>0.37<br>0.31                                                               | Johnsen M. 2001 <sup>274</sup>       |
| Finland     | Government employees                                | Finnish          | 9      |                             | All 785                                            |                                                                                                                                  | 7.26                                                                               | Kivimäki M. 1997 <sup>275</sup>      |
| Finland     | Municipal employees and male technical designers    | Finnish          | 6      | 7-point Likert              | Grade 8 256<br>Grade 9 256<br>Grade 10 273         | 10.77 <sub>11</sub> , 10.74 <sub>2</sub><br>10.53 <sub>11</sub> , 10.54 <sub>2</sub><br>10.44 <sub>11</sub> , 10.39 <sub>2</sub> | 7.32                                                                               |                                      |
| Finland     | Municipal female employees                          | Finnish          | 6      | 7-point Likert              | 577                                                | 5.14 <sub>11</sub><br>5.19 <sub>2</sub>                                                                                          | .76 <sub>11</sub><br>.64 <sub>2</sub>                                              | Kivimäki M. 2000 <sup>276</sup>      |
| Finland     | Finnish population                                  | Finnish, Swedish | 12     | 5-point Likert              | 433                                                | 5.09                                                                                                                             | 0.81                                                                               | Kivimäki M. 2002 <sup>277</sup>      |
| Japan       | Japanese population                                 | Japanese         | 28     | 7-point Likert              | 647                                                | 10.50                                                                                                                            | 1.74                                                                               | Kroll Ch. 1998 <sup>278</sup>        |
| Finland     | Finnish polytechnic students                        | Finnish          | 28     | 7-point Likert              | 741                                                | 9.60                                                                                                                             | 1.34                                                                               | Kuuppelomäki, M. 2003 <sup>279</sup> |
| Sweden      | Elderly patients                                    | Swedish          | 9      | 3-point Likert              | 287 all<br>93 health c<br>128 business<br>66 techn | 5.04 <sub>61</sub><br>5.13 <sub>11</sub><br>5.11 <sub>2</sub><br>5.28 <sub>3</sub>                                               | 0.61 <sub>61</sub><br>0.57 <sub>11</sub><br>0.53 <sub>2</sub><br>0.56 <sub>3</sub> | Larsson G. 1995 <sup>280</sup>       |
| Sweden      | White-collar workers                                | Swedish          | 9      | 5-point Likert              | 53                                                 | 2.16-2.15                                                                                                                        | 0.35-0.36                                                                          | Larsson G. 1995 <sup>280</sup>       |
| Netherlands | Dutch men and women                                 | Dutch            | 3      | 3 choices                   | 1140                                               |                                                                                                                                  | .79                                                                                | Larsson G. 1994 <sup>281</sup>       |
| Sweden      | General population                                  | Swedish          | 3      | 3 choices                   | 2514                                               |                                                                                                                                  | .89                                                                                | van Loon A.J.M. 2001 <sup>282</sup>  |
| Sweden      | General population                                  | Swedish          | 3      | 3 choices                   | 3949                                               |                                                                                                                                  |                                                                                    | Lundberg O. 1994 <sup>283</sup>      |
| Israel      | Children with learning disorders                    | Hebrew           | 16+3   | 4-point Likert              | 4390                                               | 1.51                                                                                                                             | 4.83                                                                               | Lundberg O. 1995 <sup>284</sup>      |
| Israel      | Children with learning difficulties                 | Hebrew           | 16+3   | 4-point Likert              | 238 all<br>130 boys<br>108 girls                   | 49.58<br>47.83                                                                                                                   | 5.37<br>5.96                                                                       | Margalit M. 1995 <sup>285</sup>      |
| Israel      | Preschool children                                  | Hebrew           | 16+3   | 4-point Likert              | 230                                                |                                                                                                                                  | .72                                                                                | Margalit M. 1996 <sup>286</sup>      |
| USA         | Older adults                                        | English          | 9      | 5-point Likert              | 94<br>65<br>71                                     | 48.62<br>50.03<br>50.94                                                                                                          | 6.28<br>6.54<br>4.83                                                               | Margalit M. 1998 <sup>287</sup>      |
| USA         | Older adults                                        | English          | 9      | 5-point Likert              | 187 all<br>50 LD<br>76 Non-LD<br>51 high-risk      | 49.45<br>52.74<br>47.77                                                                                                          | 5.48<br>5.46<br>5.90                                                               | Midanik L.T. 1992 <sup>288</sup>     |



|             |                                                                 |         |                             |                |                                                   |                                                                                                               |                                                      |                             |                                 |
|-------------|-----------------------------------------------------------------|---------|-----------------------------|----------------|---------------------------------------------------|---------------------------------------------------------------------------------------------------------------|------------------------------------------------------|-----------------------------|---------------------------------|
| Israel      | Preschool children at risk for developing learning disabilities | Hebrew  | 16+3 children               | 4-point Likert | 35.60 women<br>36.30 men                          | 4.50<br>4.30                                                                                                  | .72                                                  | Most T. 2000 <sup>289</sup> |                                 |
| USA         | Students at risk of school failure                              | English | 9 sense of school coherence | 3-point Likert | 98 all<br>39 high-risk<br>59 nondisabled          | 8.51<br>5.07<br>0.37                                                                                          | .65                                                  | Nash J. 2002 <sup>290</sup> |                                 |
| Finland     | General population                                              | Finnish | 7 coherence                 | 4 choices      | 1861                                              | 22.20<br>22.25 women<br>23.08 employed<br>21.37 unemployed<br>22.18 men<br>23.30 employed<br>21.07 unemployed | 0.13<br>0.18<br>0.13<br>0.34<br>0.19<br>0.13<br>0.36 | .72                         | Niemela M. 2002 <sup>291</sup>  |
| USA         | Homeless drug-abusing minority women                            | English | 13                          | 5-point Likert | 581                                               | 3.02                                                                                                          | 0.67                                                 | .76                         | Nyamathi A. 1992 <sup>292</sup> |
| USA         | Black homeless women                                            | English | 13                          | 5-point Likert | All 460<br>High risk 299<br>Moderate 63<br>Low 98 | 2.97<br>3.16<br>3.36                                                                                          | 0.66<br>0.16<br>0.70                                 | .76                         | Nyamathi A. 1992 <sup>293</sup> |
| USA         | Women at risk for HIV infection                                 | English | 13                          | 5-point Likert | 535                                               | 3.02                                                                                                          | 0.67                                                 | .76                         | Nyamathi A. 1993 <sup>294</sup> |
| Israel      | Retirees and their spouses                                      | Hebrew  | 26 family                   | 7-point Likert | 214                                               | 151.02                                                                                                        | 18.17                                                | .88                         | Sagy S. 1992 <sup>102</sup>     |
| Israel      | School children and their parents                               | Hebrew  | 12 family                   | 7-point Likert | 201                                               | 57.68                                                                                                         | 10.00                                                | .81                         | Sagy S. 1998 <sup>219</sup>     |
| Israel      | Schoolchildren 8 <sup>th</sup> grade                            | Hebrew  | 12 family                   | 7-point Likert | 107<br>91                                         | 59.24                                                                                                         | 10.36                                                | .81                         | Sagy S. 1998 <sup>219</sup>     |
| Israel      | Israeli Jewish adolescents                                      | Hebrew  | 12 family                   | 7-point Likert | total 226<br>MC 81<br>NMC 145                     | 4.34<br>4.89                                                                                                  | 0.72<br>0.70                                         | .76                         | Sagy S. 2001 <sup>295</sup>     |
| Germany     | General population                                              | German  | 29 family                   | 5-point Likert | 266<br>448                                        | 4.49<br>4.76                                                                                                  | 0.84<br>0.80                                         | .74<br>.77                  | Sagy S. 2002 <sup>220</sup>     |
| Germany     | General population                                              | German  | 3                           | 3 choices      | 3515                                              | 113.20<br>112.47 women<br>113.91 men                                                                          | 15.07<br>15.07<br>15.05                              | .91                         | Schumann A. 2003 <sup>296</sup> |
| Germany     | General population                                              | German  | 3                           | 3 choices      | 3515                                              | 4.61 all<br>4.58 women<br>4.64 men                                                                            | 1.17<br>1.14<br>1.19                                 | .45                         | Schumann A. 2003 <sup>296</sup> |
| Germany     | General population                                              | German  | 3 BASOC                     | 5-point Likert | 3515                                              | 12.55 all<br>12.41 women<br>12.69 men                                                                         | 2.13<br>2.17<br>2.08                                 | .71                         | Schumann A. 2003 <sup>296</sup> |
| Netherlands | Older adults                                                    | Dutch   | 11                          | 4 choices      | 90                                                | 35.65 women                                                                                                   | 5.21                                                 | .77                         | Smitis C. 1995 <sup>297</sup>   |

|                |                                        |                                 |    |                |       |                      |              |     |                                      |
|----------------|----------------------------------------|---------------------------------|----|----------------|-------|----------------------|--------------|-----|--------------------------------------|
| South Africa   | Male supervisors                       | Afrikaans                       | 13 | 5-point Likert | 79    | 36.20 men            | 4.98         | .68 | Strümpfer D. 1997 <sup>298</sup>     |
| South Africa   | Male farm workers                      | Afrikaans                       | 13 | 5-point Likert | 149   | 40.90                | 6.14         | .68 | Strümpfer D.J.W. 1997 <sup>299</sup> |
| Sweden         | Foreign-born immigrants                | Farsi, Spanish, Turkish, Polish | 3  | 5 choices      | 1980  |                      |              |     | Sundquist J. 2000 <sup>300</sup>     |
| Finland        | General population aged 15-64          | Finnish Swedish                 | 16 | 4 choices      | 3115  | 9.50women<br>9.55men | 1.20<br>1.17 |     | Suominen S. 1993 <sup>301</sup>      |
| Finland        | General population                     | Finnish                         | 16 | 4-point Likert | 3115  | 9.52                 | 1.14         | .84 | Suominen S. 1999 <sup>302</sup>      |
| United Kingdom | General population                     | English                         | 3  | 3 choices      | 1976  |                      |              |     | Suominen S. 2001 <sup>303</sup>      |
| Finland        | Municipal employees                    | Finnish                         | 9  | 4 choices      | 20579 | 1.84                 | 1.15         | .35 | Surtees P. 2003 <sup>304</sup>       |
| USA            | Children with asthma and their parents | English                         | 16 | 4-point Likert | 856   |                      |              | .80 | Vahtera J. 1996 <sup>305</sup>       |
| Finland        | Working people                         | Finnish                         | 28 |                | 624   | 46.30                | 7.30         |     | Vinson J.A. 2002 <sup>306</sup>      |
|                |                                        |                                 |    |                | 232   | 46.80                | 7.30         |     |                                      |
|                |                                        |                                 |    |                | 235   |                      |              |     |                                      |
|                |                                        |                                 |    |                | 817   |                      |              |     | Vuori J. 1994 <sup>307</sup>         |
| t = time       |                                        |                                 |    |                |       |                      |              |     |                                      |

Table 5. Correlation of SOC with measures serving as tests of criterion validity from studies published 1992-2003.

| Measure/Variable                                                    | Sample                                                  | N          | Instruments measuring health                                                     |                                         |
|---------------------------------------------------------------------|---------------------------------------------------------|------------|----------------------------------------------------------------------------------|-----------------------------------------|
|                                                                     |                                                         |            | Coeff<br>r                                                                       | First author                            |
| Brief Psychiatric Rating Scale (BPRS)                               | Schizophrenic patients                                  | 120        | -.44 <sub>s</sub>                                                                | Bengtsson-Tops A. 2000 <sup>8</sup>     |
| British Isles Lupus Assessment Group Disease Activity Index (BILAG) | Patients with SLE                                       | 60         | -.07 ns                                                                          | Büchi S. 2000 <sup>146</sup>            |
| General Health Questionnaire (GHQ)                                  | College students                                        | 52         | -.39                                                                             | Amirkhan J.H 2003 <sup>1</sup>          |
| General Health Questionnaire (GHQ)                                  | Students                                                | 95         | -.32                                                                             | Gibson L. 1996 <sup>308</sup>           |
| General Health Questionnaire (GHQ)                                  | General population                                      | 439        | -.50                                                                             | Pallant J. 2002 <sup>214</sup>          |
| General Health Questionnaire (GHQ)                                  | Psychiatric outpatients and community controls          | 441        | -.66 <sub>p</sub>                                                                | Sammallahti P. 1996 <sup>105</sup>      |
| General Health Questionnaire (GHQ)                                  | Patients with severe multiple trauma                    | 26         | .33 <sub>t1</sub> ns<br>-.71 <sub>t2</sub><br>-.62 <sub>t3</sub>                 | Snekkevik H. 2003 <sup>229</sup>        |
| Gießener Beschwerdebogen (GBB)                                      | Adolescents aged 16-20 years                            | 341        | -.54 <sub>p</sub>                                                                | Buddeberg-Fisher B. 2001 <sup>145</sup> |
| Health Assessment Questionnaire (HAQ)                               | Patients with rheumatoid arthritis (RA)                 | 89         | .19 ns                                                                           | Büchi S. 1998 <sup>19</sup>             |
| Health Assessment Questionnaire (HAQ)                               | Patients with RA and traffic accident victims           | 89<br>112  | -.19 ns                                                                          | Schnyder U. 1999 <sup>109</sup>         |
| Health Assessment Questionnaire (HAQ – modified)                    | Patients with rheumatoid arthritis (RA)                 | 828        | -.27 <sup>a</sup><br>-.25 <sup>b</sup><br>-.37 <sup>c</sup><br>-.34 <sup>d</sup> | Callahan L. 1995 <sup>20</sup>          |
| Global Health Status Scale                                          |                                                         |            |                                                                                  |                                         |
| Health Index (HI)                                                   | HIV-infected patients and controls                      | 514        | .66 <sub>p</sub> <sup>c</sup><br>.46 <sub>p</sub> <sup>d</sup>                   | Cederfjäll C. 2001 <sup>29</sup>        |
| Health Index (HI)                                                   | Patients with cancer                                    | 79         | .32 <sub>s</sub>                                                                 | Forsberg C. 1996 <sup>160</sup>         |
| Health Index (HI)                                                   | Predialytic uremic patients and healthy reference group | 38<br>268  | -.44 <sub>s</sub>                                                                | Klang B. 1996 <sup>189</sup>            |
| Health Sickness Rating Scale (HSRS)                                 | Middle-aged psychiatric high-risk subjects              | 148        | .51 <sub>p</sub>                                                                 | Cederblad M. 1996 <sup>309</sup>        |
| Health Utility Index Score                                          | Healthy subjects                                        | 16291      | .31 <sub>p</sub>                                                                 | Hood S.C. 1996 <sup>175</sup>           |
| HIV Symptom Scale                                                   | HIV-infected patients and controls                      | 514        | -.42 <sub>p</sub> <sup>c</sup><br>-.34 <sub>p</sub> <sup>d</sup>                 | Cederfjäll C. 2001 <sup>29</sup>        |
| Hopkin's Symptom Checklist                                          | Patients and controls                                   | 59<br>276  | -.75                                                                             | Friberg O. 2003 <sup>48</sup>           |
| Hopkin's Symptom Checklist                                          | Homeless women and low-income housed women              | 113<br>116 | -.62                                                                             | Ingram K. 1996 <sup>176</sup>           |
| Leddy Healthiness Scale                                             | Adult volunteers                                        | 125        | .70<br>.64<br>.60<br>.53                                                         | Leddy S. 1996 <sup>310</sup>            |
| - power                                                             |                                                         |            |                                                                                  |                                         |
| - purpose                                                           |                                                         |            |                                                                                  |                                         |
| - connections                                                       |                                                         |            |                                                                                  |                                         |
| Mental Health Inventory (MHI)                                       | Divorced Muslim Arabs                                   | 306        | .55 <sub>p</sub>                                                                 | Cohen O. 2003 <sup>35</sup>             |
| Mental Health Inventory (MHI)                                       | Women with disabilities                                 | 88         | .80 <sub>p</sub>                                                                 | Dangoor N. 1994 <sup>37</sup>           |
| Mental Health Inventory (MHI)                                       | Students                                                | 202        | .58                                                                              | Ebert S. 2002 <sup>42</sup>             |
| Mental Health Inventory (MHI)                                       | Israeli Jewish women with physical disabilities and     | 94<br>94   | .81                                                                              | Florian V. 1994 <sup>46</sup>           |

|                                                                                                             |                                                     |       |                                                                  |                                               |
|-------------------------------------------------------------------------------------------------------------|-----------------------------------------------------|-------|------------------------------------------------------------------|-----------------------------------------------|
|                                                                                                             | controls                                            |       |                                                                  |                                               |
| Mental Health Inventory (MHI-5)                                                                             | General population                                  | 3515  | .51-.65                                                          | Schumann A. 2003 <sup>296</sup>               |
| MOS Short Form 36 (SF-36)                                                                                   | Patients with musculoskeletal pain                  | 189   |                                                                  | Atroshi I. 2002 <sup>2</sup>                  |
| - bodily pain                                                                                               |                                                     |       | .13 <sub>p</sub>                                                 |                                               |
| - mental health                                                                                             |                                                     |       | .47 <sub>p</sub>                                                 |                                               |
| MOS Short Form 36 (SF-36)                                                                                   | Students                                            | 202   |                                                                  | Ebert S. 2002 <sup>42</sup>                   |
| - global health                                                                                             |                                                     |       | .51                                                              |                                               |
| MOS Short Form 36 (SF-36): Physical Component Scale (PCS)                                                   | Patients with RA and traffic accident victims       | 89    | .20 ns                                                           | Schnyder U. 1999 <sup>109</sup>               |
| MOS Short Form 36 (SF-36): Physical Component Scale (PCS)                                                   | Patients with SLE                                   | 112   |                                                                  | Büchi S. 2000 <sup>146</sup>                  |
| MOS Short Form 36 (SF-36): Mental Component Scale (MCS)                                                     |                                                     | 60    | .22 ns                                                           |                                               |
| MOS Short Form 12 (SF-12): Physical Component Scale (PCS)                                                   | Patients with Menier's disease and healthy controls | 112   | .64 <sub>p</sub>                                                 | Hessén Söderman A-C. 2002 <sup>174</sup>      |
| MOS Short Form 12 (SF-12): Mental Component Scale (MCS)                                                     |                                                     | 268   | .05 <sub>p</sub> ns                                              |                                               |
| Oswestry low-back Questionnaire                                                                             | Adult patients                                      | 80    | -.54 <sub>p</sub>                                                | Santavirta N. 1996 <sup>222</sup>             |
| Oswestry low-back Questionnaire                                                                             | Adult patients                                      | 85    | -.23 <sub>s</sub>                                                | Santavirta N. 1996 <sup>223</sup>             |
| Pain Scale                                                                                                  | Patients with rheumatoid arthritis                  | 828   | -.34 <sub>s</sub>                                                | Callahan L. 1995 <sup>20</sup>                |
| Pain VAS                                                                                                    | Patients with rheumatoid arthritis                  | 89    | -.26 <sup>a</sup><br>-.25 <sup>b</sup>                           | Büchi S. 1998 <sup>19</sup>                   |
| Pennebaker Inventory of Limbic Languidness (PILL)                                                           | Students                                            | 202   | -.35 <sub>p</sub>                                                | Ebert S. 2002 <sup>42</sup>                   |
| Rheumatoid Arthritis Disease Activity Index (RADAI)                                                         | Patients with rheumatoid arthritis                  | 89    | -.31                                                             | Büchi S. 1998 <sup>19</sup>                   |
| Self-Illness Separation (SIS)                                                                               | Patients with SLE                                   | 60    | -.33 <sub>p</sub>                                                | Büchi S. 2000 <sup>146</sup>                  |
| Self-perceived health                                                                                       | Healthy subjects                                    | 16291 | .39 <sub>p</sub><br>.21 <sub>p</sub>                             | Hood S.C. 1996 <sup>175</sup>                 |
| Self Report Symptom Check List (SCL)                                                                        | Adolescents aged 16-20                              | 341   | -.61 <sub>p</sub>                                                | Buddeberg-Fisher B. 2001 <sup>145</sup>       |
| Sickness Impact Profile (SIP)                                                                               | Swedish patients with EDS                           | 77    | -.32                                                             | Berglund B. 2003 <sup>9</sup>                 |
| - physical dimension                                                                                        |                                                     |       | -.10 ns                                                          |                                               |
| - psychosocial dimension                                                                                    |                                                     |       | -.46                                                             |                                               |
| Sickness Impact Profile (SIP)                                                                               | Older males                                         | 199   | -.50                                                             | Brooks J.D. 1998 <sup>144</sup>               |
| Sickness Impact Profile (SIP)                                                                               | Cancer patients                                     | 25    | -.64 <sub>s</sub>                                                | Edman L. 2001 <sup>311</sup>                  |
| Sickness Impact Profile (SIP)                                                                               | Swedish urban population                            | 145   | -.29 <sub>s</sub> <sup>a</sup><br>-.30 <sub>s</sub> <sup>b</sup> | Langius A. 1993 <sup>65</sup>                 |
| Scale of Psychological Distress Symptom Checklist (SCL-90)                                                  | Female students                                     | 54    | -.35 <sub>p</sub>                                                | Sarid O. 2003 <sup>224</sup>                  |
| Symptom Checklist (SCL-90)                                                                                  | Middle-aged psychiatric high-risk subjects          | 148   | .72 <sub>p</sub>                                                 | Cederblad M. 1996 <sup>309</sup>              |
| Symptom Checklist (SCL-90)                                                                                  | Traffic accident victims                            | 51    | -.54 <sub>p</sub><br>-.66 <sub>p</sub>                           | Frommberger U. 1999 <sup>49</sup>             |
| Symptom Checklist (SCL-90)                                                                                  | Psychiatric outpatients and community controls      | 441   | -.83 <sub>p</sub>                                                | Sammallahti P. 1996, 1997 <sup>105, 312</sup> |
| Symptom Checklist (24 items) - physical symptoms                                                            | Drug addicts                                        | 20    | -.74                                                             | Berg J.E. 1996 <sup>257</sup>                 |
| Symptom Checklist-90-R - global severity index                                                              | Women with IBS and healthy controls                 | 324   | -.64 <sub>p</sub>                                                | Motzer Adams S. 2003 <sup>79</sup>            |
| Symptom Checklist-90-R - somatization                                                                       |                                                     |       | -.31 <sub>p</sub>                                                |                                               |
| Symptom Checklist-90-R - somatization                                                                       | Homeless drug-abusing minority women                | 581   | -.46 <sub>p</sub>                                                | Nyamathi A. 1992 <sup>292</sup>               |
| Systemic Lupus International Collaborating Clinic/American College of Rheumatology (SLICC/ACR) Damage Score | Patients with SLE                                   | 60    | .12 ns                                                           | Büchi S. 2000 <sup>146</sup>                  |
| Tinnitus Severity Questionnaire (TSQ)                                                                       | Patients with Ménière's disease                     | 112   | -.58                                                             | Hessén Söderman A-C. 2001 <sup>173</sup>      |
| Wahler Physical Symptom Inventory (WPS)/                                                                    | Native and Anglo Americans                          | 81    | -.29 <sub>p</sub>                                                | Bowman B.J. 1996 <sup>17</sup>                |
| Vertigo Symptom Scale (VSS)                                                                                 | Patients with Ménière's                             | 105   | -.41 <sub>p</sub>                                                |                                               |
|                                                                                                             |                                                     | 112   | .22                                                              | Hessén Söderman A-                            |

disease 268 C. 2001<sup>173</sup>  
 a) SOC-29 b) SOC-13 c) male d) female ns = not significant r<sub>s</sub> = Spearman's rank correlation coefficient  
 r<sub>p</sub> = Pearson's product moment correlation coefficient t = time

### Instruments measuring generalised perceptions of self and environment

| Variable/Measure                                                                                                    | Sample                                                     | N          | Coeff<br>r                                                                       | First author                                |
|---------------------------------------------------------------------------------------------------------------------|------------------------------------------------------------|------------|----------------------------------------------------------------------------------|---------------------------------------------|
| <i>Anger</i>                                                                                                        |                                                            |            |                                                                                  |                                             |
| Anger Arousal Scale                                                                                                 | Patients with CHD                                          | 164        | -.37 <sup>e</sup>                                                                | Kravets S. 1993 <sup>63</sup>               |
| <i>Anxiety</i>                                                                                                      |                                                            |            |                                                                                  |                                             |
| Adult Attachment Scale (AAS)<br>- anxiety                                                                           | Women with perinatal<br>bereavement                        | 109        | -.44                                                                             | Uren T.H. 2002 <sup>125</sup>               |
| Anxiety Scale                                                                                                       | Adults with HIV                                            | 255        | -.42                                                                             | Linn J.G. 1995 <sup>313</sup>               |
| Arthritis Impact Measurement Scale<br>(AIMS)                                                                        | Patients with rheumatic<br>disorders                       | 1333       | -.63 <sub>p</sub>                                                                | Hawley D. 1992 <sup>55</sup>                |
| Beck Anxiety Inventory (BAI)                                                                                        | Sawmill workers                                            | 51         | -.43 <sup>e</sup>                                                                | Edwards D. 2001 <sup>153</sup>              |
| Costello-Comrey Depression and<br>Anxiety Scale (CCDAS)<br>- anxiety                                                | College students                                           | 133        | -.45 <sub>p</sub>                                                                | Bigler M. 2001 <sup>10</sup>                |
| Florida Health and Family Life<br>Instrument<br>- anxiety                                                           | Southeast Asian refugees                                   | 2234       |                                                                                  | Ying Y-W. 1997 <sup>314</sup>               |
| Hopkin's Symptom Checklist<br>- anxiety                                                                             | Adult family members                                       | 456        | -.29                                                                             | Cederblad M. 2003 <sup>28</sup>             |
| Hospital Anxiety and Depression Scale<br>(HADS)                                                                     | Patients with RA                                           | 89         | -.55 <sub>p</sub>                                                                | Büchi S. 1998 <sup>19</sup>                 |
| Hospital Anxiety and Depression Scale<br>(HADS)                                                                     | French adults                                              | 647        | -.52 <sup>a</sup><br>-.44 <sup>b</sup>                                           | Gana K. 2001 <sup>51</sup>                  |
| Hospital Anxiety and Depression Scale<br>(HADS)                                                                     | French adults                                              | 193        | -.51                                                                             | Gana K. 2001 <sup>315</sup>                 |
| Hospital Anxiety and Depression Scale<br>(HADS)                                                                     | Patients with Menier's disease<br>and healthy controls     | 112<br>268 | -.67 <sub>p</sub>                                                                | Hessén Söderman<br>A-C. 2002 <sup>174</sup> |
| Hospital Anxiety and Depression Scale<br>(HADS)                                                                     | Accident victims and patients<br>with RA                   | 96<br>60   | -.28 -- -.61<br>-.63 -- .73                                                      | Schnyder U. 2000 <sup>110</sup>             |
| Hospital Anxiety and Depression<br>Scale (HADS)                                                                     | Patients with severe multiple<br>trauma                    | 26         | -.75 <sub>s12</sub><br>-.82 <sub>s13</sub>                                       | Snekkevik H. 2003 <sup>229</sup>            |
| Hospital Anxiety and Depression<br>Scale (HADS)                                                                     | Cancer patients                                            | 20         | Ns                                                                               | Wettergren L. 1997 <sup>247</sup>           |
| Karolinska Scales of Personality<br>- somatic anxiety<br>- muscular tension<br>- psychic anxiety<br>- psychasthenia | Obese patients                                             | 33         | -.57 <sub>p</sub><br>-.46 <sub>p</sub><br>-.83 <sub>p</sub><br>-.59 <sub>p</sub> | Björvell H. 1994 <sup>12</sup>              |
| Karolinska Scales of Personality<br>- somatic anxiety<br>- psychological anxiety                                    | Healthy nurses and patients<br>(overweight, cancer)        | 80         | -.57 -- .62<br>-.47 -- .83                                                       | Langius A. 1996 <sup>67</sup>               |
| Sixteen Personality Factor<br>Questionnaire (16PF)<br>- anxiety                                                     | Undergraduates                                             | 100        | -.52                                                                             | Mlonzi EN. 1998 <sup>316</sup>              |
| State Anxiety Questionnaire                                                                                         | Female students                                            | 54         | -.70 <sub>p</sub>                                                                | Sarid O. 2003 <sup>224</sup>                |
| State-Trait Anxiety Inventory (STAI)                                                                                | Students                                                   | 193        | -.68                                                                             | Kaiser C. 1996 <sup>59</sup>                |
| State-Trait Anxiety Inventory (STAI)                                                                                | Predialytic uremic patients<br>and healthy reference group | 38<br>268  | -.64 <sub>s</sub>                                                                | Klang B. 1996 <sup>189</sup>                |
| State-Trait Anxiety Inventory (STAI)                                                                                | Patients with CHD                                          | 164        | -.53 <sup>e</sup>                                                                | Kravets S. 1993 <sup>63</sup>               |
| State-Trait Anxiety Inventory<br>(STAI-Form Y-2)                                                                    | Nursing students                                           | 132        | -.70 -- -.75                                                                     | Nintachan P. 2000 <sup>85</sup>             |
| State-Trait Anxiety Inventory (STAI)                                                                                | Handicapped and their<br>spouses                           | 152        | -.82 <sup>e</sup>                                                                | Rena F. 1998 <sup>98</sup>                  |
| State-Trait Anxiety Inventory<br>(STAI)                                                                             | Patients with irritable bowel<br>syndrome and controls     | 151        | -.60 <sub>p</sub>                                                                | Sperber A. 1999 <sup>231</sup>              |

|                                                                                                                   |                                                             |                   |                                                                  |                                          |
|-------------------------------------------------------------------------------------------------------------------|-------------------------------------------------------------|-------------------|------------------------------------------------------------------|------------------------------------------|
| Symptom-Checklist-90-R<br>- anxiety                                                                               | Women with IBS and healthy controls                         | 324               | -.53 <sub>p</sub>                                                | Motzer Adams S. 2003 <sup>79</sup>       |
| Taylor Manifest Anxiety Scale (TMAS)                                                                              | Adult college students                                      | 105               | -.50                                                             | Flannery R.B. 1994 <sup>317</sup>        |
| Well-being Scale: anxiety                                                                                         | HIV-patients and controls                                   | 514               | -.71 <sub>p</sub> <sup>c</sup><br>-.67 <sub>p</sub> <sup>d</sup> | Cederfjäll C. 2001 <sup>29</sup>         |
| Trier Personality Questionnaire<br>- mental health                                                                | General population                                          | 3515              | .76-.79                                                          | Schumann A. 2003 <sup>296</sup>          |
| <b>Attachment</b>                                                                                                 |                                                             |                   |                                                                  |                                          |
| The Adult Attachment Scale (AAS)<br>- closeness<br>- search for meaning<br>- degree of meaning                    | Women with perinatal bereavement                            | 109               | .49<br>-.37<br>.27                                               | Uren T.H. 2002 <sup>125</sup>            |
| <b>Attributional style</b>                                                                                        |                                                             |                   |                                                                  |                                          |
| IPC Scale<br>- internal control<br>- powerful others control<br>- chance control                                  | Traffic accident victims                                    | 51                | .22 ns<br>-.36 <sub>p</sub><br>-.19 ns                           | Frommberger U. 1999 <sup>49</sup>        |
| <b>Burnout</b>                                                                                                    |                                                             |                   |                                                                  |                                          |
| The Maslach Burnout Inventory (MBI)<br>- emotional exhaustion<br>- depersonalisation<br>- personal achievement    | Social workers                                              | 78                | -.48<br>-.25<br>.36                                              | Baker M. 1997 <sup>142</sup>             |
| The Maslach Burnout Inventory (MBI)<br>- emotional exhaustion<br>- depersonalisation<br>- personal accomplishment | Social workers                                              | 81                | -.30<br>-.20 ns<br>-.34                                          | Gilbar O. 1998 <sup>318</sup>            |
| The Maslach Burnout Inventory (MBI)<br>- emotional exhaustion<br>- depersonalisation<br>- personal achievement    | Dialysis nurses                                             | 238               | -.57 <sub>p</sub><br>-.54 <sub>p</sub><br>.53 <sub>p</sub>       | Lewis S. 1992 <sup>69</sup>              |
| The Maslach Burnout Inventory (MBI)<br>- sentimental exhaustion<br>- depersonalisation<br>- personal achievement  | Nurses                                                      | 79                | -.55<br>[-.45] <sup>2</sup><br>.44                               | Tselebis A. 2001 <sup>243</sup>          |
| The Compassion Satisfaction/Fatigue Test<br>- burnout                                                             | Counsellors                                                 | 130               | -.59                                                             | Ortlepp K. 2002 <sup>88</sup>            |
| The Burnout Measure                                                                                               | District nurses                                             | 33                | -.69                                                             | Pålsson M-B. 1996 <sup>94</sup>          |
| <b>Compassion/Empathy</b>                                                                                         |                                                             |                   |                                                                  |                                          |
| The Compassion Satisfaction/Fatigue Test<br>- compassion fatigue<br>- compassion satisfaction                     | Counsellors                                                 | 130               | .51<br>-.56                                                      | Ortlepp K. 2002 <sup>88</sup>            |
| The Empathy Construct Rating Scale                                                                                | District nurses                                             | 33                | .76                                                              | Pålsson M-B. 1996 <sup>94</sup>          |
| <b>Contentment</b>                                                                                                |                                                             |                   |                                                                  |                                          |
| General Contentment Scale (GCS)                                                                                   | College students                                            | 133               | .84                                                              | Bigler M. 2001 <sup>10</sup>             |
| <b>Demoralisation</b>                                                                                             |                                                             |                   |                                                                  |                                          |
| PERI Demoralisation Scale <sup>1</sup>                                                                            | Adolescents and youths aged 12-24 years and reference group | 750<br>60<br>1033 | -.75 <sub>p</sub>                                                | Höfer R. 1997 <sup>319</sup>             |
| PERI Demoralisation Scale                                                                                         | Mothers/immigrants                                          | 562               | -.62                                                             | Soskolne V. 2001 <sup>230</sup>          |
| <b>Depression</b>                                                                                                 |                                                             |                   |                                                                  |                                          |
| Allgemeine Depression Skala (ADS)                                                                                 | Adolescents                                                 | 341               | -.56                                                             | Buddeberg-Fischer B. 2001 <sup>145</sup> |
| Arthritis Impact Measurement Scale (AIMS)                                                                         | Patients with rheumatic disorders                           | 1333              | -.69 <sub>p</sub>                                                | Hawley D. 1992 <sup>55</sup>             |
| Beck Depression Inventory (BDI)                                                                                   | Native Americans                                            | 81                | -.49                                                             | Bowman B.J. 1996 <sup>17</sup>           |

|                                                                   |                                                      |      |                     |                                          |
|-------------------------------------------------------------------|------------------------------------------------------|------|---------------------|------------------------------------------|
|                                                                   | Anglo Americans                                      | 105  | -.66                |                                          |
| Beck Depression Inventory (BDI)                                   | Patients with major depressive disorder and controls | 50   | -.71-               | Carstens J. 1997 <sup>21</sup>           |
|                                                                   |                                                      | 50   | -.66                |                                          |
| Beck Depression Inventory (BDI)                                   | Patients with acute myocardial infarction            | 290  | -.53 <sub>p</sub>   | Drory Y. 1999 <sup>320</sup>             |
| Beck Depression Inventory (BDI)                                   | Sawmill workers                                      | 51   | -.58                | Edwards D. 2001 <sup>153</sup>           |
| Beck Depression Inventory (BDI)                                   | Adult college students                               | 105  | -.47                | Flannery R.B. 1994 <sup>317</sup>        |
| Beck Depression Inventory (BDI-Child)                             | Homeless substance-abusers with children             | 72   | -.51                | Flick L.M. 1998 <sup>45</sup>            |
| Beck Depression Inventory (BDI)                                   | Students                                             | 193  | -.57                | Kaiser C. 1996 <sup>59</sup>             |
| Beck Depression Inventory (BDI)                                   | Juvenile delinquents                                 | 159  | -.45                | Koposov RA. 2003 <sup>62</sup>           |
| Beck Depression Inventory (BDI)                                   | Patients with CHD                                    | 164  | -.53                | Kravetz S. 1993 <sup>63</sup>            |
| Beck Depression Inventory (BDI)                                   | Patients with Scleroderma                            | 50   | -.64                | Matsuura E. 2003 <sup>205</sup>          |
| Beck Depression Inventory (BDI)                                   | Female toxicological inpatients                      | 150  | -.56                | Polewka A. 2001 <sup>91</sup>            |
| Beck Depression Inventory (BDI)                                   | Nurses                                               | 79   | -.58                | Tselebis A. 2001 <sup>243</sup>          |
| Center for Epidemiological Studies – depression (CES-D)           | College students                                     | 52   | -.69                | Amirkhan J.H. 2003 <sup>1</sup>          |
| Center for Epidemiological Studies – depression (CES-D)           | Adults with HIV                                      | 255  | -.47                | Linn J.G. 1995 <sup>313</sup>            |
| Costello-Comrey Depression and Anxiety Scale (CCDAS) - depression | College students                                     | 133  | -.90 <sub>p</sub>   | Bigler M. 2001 <sup>10</sup>             |
| Florida Health and Family Life Instrument - depression            | Southeast Asian refugees                             | 2234 |                     | Ying Y-W. 1997 <sup>314</sup>            |
|                                                                   |                                                      |      | .34                 |                                          |
|                                                                   |                                                      |      | .28                 |                                          |
| Hamilton Depression Rating Scale (HDRS)                           | Female toxicological inpatients                      | 150  | -.38                | Polewka A. 2001 <sup>91</sup>            |
| Hopkin's Symptom Checklist - depression                           | Adult family members                                 | 456  |                     | Cederblad M. 2003 <sup>28</sup>          |
|                                                                   |                                                      |      | -.44                |                                          |
| Hospital Anxiety and depression Scale (HADS)                      | Patients with RA and traffic accident victims        | 89   | -.55                | Schnyder U. 1999 <sup>109</sup>          |
|                                                                   |                                                      | 112  |                     |                                          |
| Hospital Anxiety and depression Scale (HADS)                      | Patients with severe multiple trauma                 | 26   | -.50 <sub>S12</sub> | Snekkevik H. 2003 <sup>229</sup>         |
|                                                                   |                                                      |      | -.62 <sub>S13</sub> |                                          |
| Hospital Anxiety and depression Scale (HADS)                      | French adults                                        | 647  | -.49                | Gana K. 2001 <sup>51</sup>               |
|                                                                   |                                                      |      | -.38                |                                          |
| Hospital Anxiety and depression Scale (HADS)                      | Patients with Menier's disease and healthy controls  | 112  | -.64 <sub>p</sub>   | Hessén Söderman A-C. 2002 <sup>174</sup> |
|                                                                   |                                                      | 268  |                     |                                          |
| Hospital Anxiety and depression Scale (HADS)                      | Accident victims and patients with RA                | 96   | -.49 -- .60         | Schnyder U. 2000 <sup>110</sup>          |
|                                                                   |                                                      | 60   | -.54 -- .55         |                                          |
| Multiscore Depression Inventory                                   | Students                                             | 193  | -.74                | Kaiser C. 1996 <sup>59</sup>             |
| Profile of Mood States (POMS)                                     | Homeless drug-abusing minority women                 | 581  | -.63 <sub>p</sub>   | Nyamathi A. 1992 <sup>292</sup>          |
| Profile of Mood States (POMS)                                     | Women at risk for HIV infection                      | 535  | -.56 <sub>p</sub>   | Nyamathi A. 1993 <sup>294</sup>          |
| State-Trait Personality Inventory (STAI-T)                        | Native Americans                                     | 81   | -.43                | Bowman B.J. 1996 <sup>17</sup>           |
|                                                                   | Anglo Americans                                      | 105  | -.64                |                                          |
| Symptom Checklist-90-R - depression                               | Women with IBS and healthy controls                  | 324  | -.64 <sub>p</sub>   | Motzer Adams S. 2003 <sup>79</sup>       |
| Tedium Measure - physical exhaustion (feeling tired)              | Diabetic persons                                     | 20   | -.69                | Lundman B. 1993 <sup>321</sup>           |
| - emotional exhaustion (depressed)                                |                                                      |      |                     |                                          |
| - mental exhaustion(feeling worthless)                            |                                                      |      |                     |                                          |
| The Zung self-rating Scale - depressive mood                      | Elderly people                                       | 58   | -.42 <sub>p</sub>   | Rennemark M. 1999 <sup>322</sup>         |
| Well-being Scale: depression                                      | HIV-patients and controls                            | 514  | -.64 <sup>a</sup>   | Cederfjäll C. 2001 <sup>29</sup>         |
|                                                                   |                                                      |      | -.47 <sup>b</sup>   |                                          |
| <b>Hardiness</b>                                                  |                                                      |      |                     |                                          |
| Health-Related Hardiness Scale                                    | Post-liver transplant recipients                     | 230  | .46 <sub>p</sub>    | Newton S. 1999 <sup>83</sup>             |
| Personal Views Survey                                             | Students                                             | 336  | .43                 | Smith T.L. 1997 <sup>114</sup>           |
| Third Generation Hardiness Scale - commitment                     | Patients with CHD                                    | 164  |                     | Kravets S. 1993 <sup>63</sup>            |
|                                                                   |                                                      |      | .48                 |                                          |
| - challenge                                                       |                                                      |      | .31                 |                                          |

|                                                  |                                                                                               |           |                                        |                                                                    |
|--------------------------------------------------|-----------------------------------------------------------------------------------------------|-----------|----------------------------------------|--------------------------------------------------------------------|
| - control                                        |                                                                                               |           | .45                                    |                                                                    |
| <b>Hope/Hopelessness</b>                         |                                                                                               |           |                                        |                                                                    |
| Beck Hopelessness Scale                          | University undergraduates                                                                     | 298       | -.52 <sup>a</sup><br>-.65 <sup>b</sup> | Edwards M. J. 2001 <sup>43</sup>                                   |
| Herth Hope Index (HHI)                           | Elderly people                                                                                | 152       | .55                                    | Coward D.D. 1996 <sup>151</sup>                                    |
| Herth Hope Index (HHI)                           | African American breast cancer survivors                                                      | 162       | .54 <sub>s</sub>                       | Gibson L. 2003 <sup>323</sup>                                      |
| Rheumatology Attitude Index (RAI) - helplessness | Patients with Scleroderma                                                                     | 50        |                                        | Matsuura E. 2003 <sup>205</sup>                                    |
|                                                  |                                                                                               |           | -.35                                   |                                                                    |
| <b>Locus of Control</b>                          |                                                                                               |           |                                        |                                                                    |
| Internal Control Index                           | Students                                                                                      | 336       | .57                                    | Smith T.L. 1997 <sup>114</sup>                                     |
| Locus of Control (LOC)                           | Occupational therapy students and controls                                                    | 71<br>651 |                                        | Bränholm I-B. 1998 <sup>18</sup>                                   |
| Locus of Control (LOC)                           | Middle-aged subjects at high-risk for psychiatric disturbances                                | 148       | .44 <sub>p</sub>                       | Cederblad M. 1996 <sup>23, 26</sup>                                |
| Locus of Control (LOC)                           | Adult college students                                                                        | 105       | -.48                                   | Dahlin L. 1993 <sup>26</sup><br>Flannery R. B. 1994 <sup>317</sup> |
| Locus of Control (LOC)                           | Patients with CHD                                                                             | 164       | .26                                    | Kravets S. 1993 <sup>63</sup>                                      |
| Locus of Control (LOC) - chance                  | Male office workers                                                                           | 125       |                                        | Nakamura M. 2001 <sup>80</sup>                                     |
|                                                  |                                                                                               |           | .34                                    |                                                                    |
| Rosenbaum's Self-Control Schedule                | Nursing students                                                                              | 95        | .13 ns                                 | Thorell-Ekstrand I. 1993 <sup>124</sup>                            |
| Spheres of Control Battery – LOC                 | College students                                                                              | 52        | .52                                    | Amirkhan J.H 2003 <sup>1, 324</sup>                                |
| <b>Mastery</b>                                   |                                                                                               |           |                                        |                                                                    |
| Mastery Orientation Inventory                    | Middle-aged subjects at high-risk for psychiatric disturbances                                | 148       | .59                                    | Cederblad M. 1996 <sup>23, 26</sup>                                |
| Mastery Orientation Inventory                    | Students                                                                                      | 336       | .58                                    | Dahlin L. 1993 <sup>26</sup><br>Smith T.L. 1997 <sup>114</sup>     |
| Mastery Scale                                    | General population                                                                            | 439       | .54                                    | Pallant J. 2002 <sup>214</sup>                                     |
| Mastery Scale                                    | Older adults                                                                                  | 119       | -.31                                   | Smits C. 1995 <sup>297</sup>                                       |
| Mastery Scale                                    | General population                                                                            | 20579     | -.50                                   | Surtees P. 2003 <sup>304</sup>                                     |
| <b>Optimism</b>                                  |                                                                                               |           |                                        |                                                                    |
| Life Orientation Test                            | College students                                                                              | 112       | .59                                    | Adams T.B. 2000 <sup>134</sup>                                     |
| Life Orientation Test (revised)                  | Students                                                                                      | 202       | .66                                    | Ebert S. 2002 <sup>42</sup>                                        |
| Life Orientation Test                            | General population                                                                            | 439       | .53                                    | Pallant J. 2002 <sup>214</sup>                                     |
| Life Purpose Scale                               | College students                                                                              | 112       | .60                                    | Adams T.B. 2000 <sup>134</sup>                                     |
| Purpose in Life Test                             | College students                                                                              | 133       | .87                                    | Bigler M. 2001 <sup>10</sup>                                       |
| Purpose in Life Test                             | Parents with children with autistic spectrum disorders and parents with non-autistic children | 66<br>66  | .72                                    | Sivberg B. 2002 <sup>325</sup>                                     |
| <b>Personality</b>                               |                                                                                               |           |                                        |                                                                    |
| Bond's Defence Style Questionnaire (DSQ)         | Psychiatric outpatients and controls                                                          | 441       |                                        | Sammallahti P. 1996, 1997 <sup>105, 312</sup>                      |
| - mature defence style                           |                                                                                               |           | .31                                    |                                                                    |
| - neurotic defence style                         |                                                                                               |           | -.20                                   |                                                                    |
| - borderline defence style                       |                                                                                               |           | -.38                                   |                                                                    |
| - immature defence style                         |                                                                                               |           | -.78                                   |                                                                    |
| Child Behaviour Checklist (CBCL)                 | Adult family members                                                                          | 456       |                                        | Cederblad M. 2003 <sup>28</sup>                                    |
| - externalising                                  |                                                                                               |           | -.27                                   |                                                                    |
| - internalising                                  |                                                                                               |           | -.28                                   |                                                                    |
| Eysenck Personality Inventory                    | Students                                                                                      | 95        |                                        | Gibson L. 1996 <sup>308</sup>                                      |
| - neuroticism                                    |                                                                                               |           | -.46 ns                                |                                                                    |
| - extraversion                                   |                                                                                               |           |                                        |                                                                    |
| Eysenck Personality Questionnaire (EPQ-N)        | Patients with Gallbladder Stones disease                                                      | 28        | -.73                                   | Svebak S. 2000 <sup>237</sup>                                      |
| - neuroticism                                    |                                                                                               |           |                                        |                                                                    |



|                                                 |                                                  |       |                   |                                    |
|-------------------------------------------------|--------------------------------------------------|-------|-------------------|------------------------------------|
| Eysenck Personality Questionnaire (EPQ-R)       | General population                               | 20579 |                   | Surtees P. 2003 <sup>304</sup>     |
| - neuroticism                                   |                                                  |       | -.45              |                                    |
| - extroversion                                  |                                                  |       | -.23              |                                    |
| NEO Five Factor Inventory                       | Students                                         | 202   |                   | Ebert S. 2002 <sup>42</sup>        |
| - neuroticism                                   |                                                  |       | -.72              |                                    |
| - extraversion                                  |                                                  |       | .42               |                                    |
| - openness                                      |                                                  |       | ns                |                                    |
| - agreeableness                                 |                                                  |       | .34               |                                    |
| - conscientiousness                             |                                                  |       | .46               |                                    |
| NEO Five Factor Inventory                       | Adolescents                                      | 115   |                   | Ruiselova Z. 2000 <sup>326</sup>   |
| - neuroticism                                   |                                                  |       | -.48 - -.67       |                                    |
| - agreeableness                                 |                                                  |       | .31               |                                    |
| - conscientiousness                             |                                                  |       | .37               |                                    |
|                                                 | Pediatricians                                    | 53    |                   |                                    |
| - neuroticism                                   |                                                  |       | -.54              |                                    |
| - extraversion                                  |                                                  |       | .59               |                                    |
| - agreeableness                                 |                                                  |       | .50               |                                    |
| - conscientiousness                             |                                                  |       | .47               |                                    |
| NEO Five Factor Inventory                       | Elderly women                                    | 82    |                   | Reuselova Z. 2002 <sup>327</sup>   |
| - neuroticism                                   |                                                  |       | -.62              |                                    |
| - extraversion                                  |                                                  |       | ns                |                                    |
| - openness                                      |                                                  |       | .28               |                                    |
| - agreeableness                                 |                                                  |       | .39               |                                    |
| - conscientiousness                             |                                                  |       | .33               |                                    |
| Karolinska Scales of Personality (KSP)          | Obese patients                                   | 33    |                   | Björvell H. 1994 <sup>12</sup>     |
| - impulsiveness                                 |                                                  |       | .24 <sub>p</sub>  |                                    |
| - monotony avoidance                            |                                                  |       | .39 <sub>p</sub>  |                                    |
| - detachment                                    |                                                  |       | -.33 <sub>p</sub> |                                    |
| - socialization                                 |                                                  |       | .47 <sub>p</sub>  |                                    |
| - aggression                                    |                                                  |       | -.04 <sub>p</sub> |                                    |
| - hostility                                     |                                                  |       | -.71 <sub>p</sub> |                                    |
| - inhibition of aggression                      |                                                  |       | -.65 <sub>p</sub> |                                    |
| Karolinska Scales of Personality (KSP)          | Healthy nurses and patients (overweight, cancer) | 80    |                   | Langius A. 1996 <sup>67</sup>      |
| - hostility                                     |                                                  |       | -.71--.77         |                                    |
| Munich Personality Test (MPT)                   | Traffic accident victims                         | 51    |                   | Frommberger U. 1999 <sup>49</sup>  |
| - extraversion                                  |                                                  |       | .28               |                                    |
| - neuroticism                                   |                                                  |       | -.53              |                                    |
| - frustration tolerance                         |                                                  |       | .60               |                                    |
| Personal Project Inventory                      | University students                              | 117   |                   | Salmela-Aro K. 1992 <sup>104</sup> |
| - accomplishment                                |                                                  |       | .65 <sub>p</sub>  |                                    |
| - negative affect                               |                                                  |       | -.25 <sub>p</sub> |                                    |
| - self                                          |                                                  |       | -.19 <sub>p</sub> |                                    |
| - work                                          |                                                  |       | .24 <sub>p</sub>  |                                    |
| - routines                                      |                                                  |       | .18 <sub>p</sub>  |                                    |
| Positive and Negative Affect Scale              | Adults with cleft lip                            | 51    |                   | Cochrane W. 1999 <sup>149</sup>    |
| - positive affect                               |                                                  |       | .58               |                                    |
| - negative affect                               |                                                  |       | -.66              |                                    |
| Positive and Negative Affect Scale              | General population                               | 439   |                   | Pallant J. 2002 <sup>214</sup>     |
| - positive affect                               |                                                  |       | .43               |                                    |
| - negative affect                               |                                                  |       | -.55              |                                    |
| Positive and Negative Affect Scale              | Male supervisors                                 | 79    |                   | Strümpfer D. 1997 <sup>328</sup>   |
| - negative affect                               |                                                  |       | -.30              |                                    |
| Self-concept Clarity Scale (SCC)                | College students                                 | 133   | .69               | Bigler M. 2001 <sup>10</sup>       |
| Self-concept Differentiation (SCD)              | College students                                 | 133   | -.34              | Bigler M. 2001 <sup>10</sup>       |
| Self-Disclosure Situations Survey (SDSS)        | College students                                 | 133   | .09               | Bigler M. 2001 <sup>10</sup>       |
| - flexibility                                   |                                                  |       |                   |                                    |
| Self Motivation Inventory (SMI)                 | Obese patients                                   | 33    | -.55              | Björvell H. 1994 <sup>12</sup>     |
| Sixteen Personality Factor Questionnaire (16PF) | Undergraduates                                   | 100   |                   | Mlonzi EN. 1998 <sup>316</sup>     |
| - extraversion                                  |                                                  |       | .51               |                                    |
| - tough poise                                   |                                                  |       | .35, male ns      |                                    |
| - independence                                  |                                                  |       | .41, male ns      |                                    |

|                                                                |                                            |     |                  |                                  |
|----------------------------------------------------------------|--------------------------------------------|-----|------------------|----------------------------------|
| - control                                                      |                                            |     | .39              |                                  |
| Teacher's Report Form (TRF)                                    | Adult family members                       | 456 |                  | Cederblad M. 2003 <sup>28</sup>  |
| - externalising                                                |                                            |     | -.16             |                                  |
| - internalising                                                |                                            |     | -.10             |                                  |
| Test of Negative Social Exchange                               | Homeless women and low-income housed women | 113 |                  | Ingram K. 1996 <sup>176</sup>    |
|                                                                |                                            | 116 |                  |                                  |
| - hostility                                                    |                                            |     | -.42             |                                  |
| - interference                                                 |                                            |     | -.37             |                                  |
| - insensitivity                                                |                                            |     | -.49             |                                  |
| - ridicule                                                     |                                            |     | -.31             |                                  |
| <i>Resilience</i>                                              |                                            |     |                  |                                  |
| Resilience Scale for Adults (RSA)                              | Patients and controls                      | 59  |                  | Friborg O. 2003 <sup>48</sup>    |
|                                                                |                                            | 276 |                  |                                  |
| - personal competence                                          |                                            |     | .75              |                                  |
| - social competence                                            |                                            |     | .44              |                                  |
| - family coherence                                             |                                            |     | .45              |                                  |
| - social support                                               |                                            |     | .29              |                                  |
| - personal structure                                           |                                            |     | .33              |                                  |
| <i>Self-esteem/Self-efficacy</i>                               |                                            |     |                  |                                  |
| Deusingers' Multidimensional Self-Concept Questionnaire (FSKN) | Military officers, physicians and students | 155 | .29, .52         | Ruiselova Z. 1995 <sup>329</sup> |
|                                                                |                                            | 27  | .52, .61         |                                  |
|                                                                |                                            | 101 | .27, .64         |                                  |
| Generalized Self-efficacy Scale                                | College students                           | 52  | .46              | Amirkhan J.H. 2003 <sup>1</sup>  |
| Greer-Burgers Self-Esteem Scale (SEG)                          | Elderly people                             | 152 | .53              | Coward D.D. 1996 <sup>151</sup>  |
| Rosenberg Self-Esteem Scale (SER)                              | College students                           | 133 | .75              | Bigler M. 2001 <sup>10</sup>     |
| Rosenberg Self-Esteem Scale (SER)                              | Adult family members                       | 456 | .33              | Cederblad M. 2003 <sup>28</sup>  |
| Rosenberg Self-Esteem Scale (SER)                              | Elderly people                             | 152 | .52              | Coward D.D. 1996 <sup>151</sup>  |
| Rosenberg Self-Esteem Scale (SER)                              | Homeless substance-abusers with children   | 72  | .57              | Flick L.H. 1998 <sup>45</sup>    |
| Rosenberg Self-Esteem Scale (SER)                              | General population                         | 439 | .61              | Pallant J. 2002 <sup>214</sup>   |
| Self-Efficacy Scale (SES)                                      | Students                                   | 336 |                  | Smith T.L. 1997 <sup>114</sup>   |
| - general self-efficacy                                        |                                            |     | .66              |                                  |
| - social self-efficacy                                         |                                            |     | .44              |                                  |
| Self-Efficacy Scale (SES)                                      | Retired subjects                           | 363 | .10              | Wells Y.D. 1999 <sup>246</sup>   |
| Self-Esteem Inventory (SEI)                                    | Homeless drug-abusing minority women       | 581 | .63 <sub>p</sub> | Nyamathi A. 1992 <sup>292</sup>  |
| Self-Transcendence Scale (STS)                                 | Elderly people                             | 152 | .58              | Coward D.D. 1996 <sup>151</sup>  |

a) male b) female

<sup>1)</sup> psychological distress: poor self-esteem, hopelessness, helplessness, confused thinking, sadness, anxiety, psychophysiological symptoms

<sup>2)</sup> corrected by personal communication with the third author.

† = time

### Instruments measuring perceived stressors

| Variable/Measure                                   | Sample                                              | N   | Coeff<br>r        | First author                   |
|----------------------------------------------------|-----------------------------------------------------|-----|-------------------|--------------------------------|
| <i>Life events</i>                                 |                                                     |     |                   |                                |
| Family Inventory of Life Events and Changes (FILE) | Israeli Jewish women with disabilities and controls | 94  | -.25 <sub>p</sub> | Florian V. 1994 <sup>46</sup>  |
| Impact of Event Scale (IES)                        | Traffic accident victims                            | 51  | -.50 <sub>p</sub> | Frommberger U                  |
|                                                    |                                                     |     | -.52 <sub>p</sub> | 1999 <sup>49</sup>             |
| Impact of Event Scale (IES-15)                     | Swedish ambulance personnel                         | 362 | -.30 <sub>s</sub> | Jonsson A. 2003 <sup>179</sup> |
| Impact of Event Scale (IES)                        | Women with perinatal bereavement                    | 109 |                   | Uren T.H. 2002 <sup>125</sup>  |
| - intrusion                                        |                                                     |     | -.42              |                                |
| - avoidance                                        |                                                     |     | -.52              |                                |
| - hyper arousal symptom                            |                                                     |     | -.53              |                                |

|                                                               |                                                                                               |            |                                        |                                        |
|---------------------------------------------------------------|-----------------------------------------------------------------------------------------------|------------|----------------------------------------|----------------------------------------|
| The Life Experience Survey (LES)                              | Singaporean subjects                                                                          | 186        | -.19                                   | Bishop GD. 1993 <sup>163</sup>         |
| Perinatal Grief Scale (PGS)                                   | Women with perinatal bereavement                                                              | 109        | .71                                    | Uren T.H. 2002 <sup>125</sup>          |
| Brief Symptom Inventory(BSI) - current psychological distress | Women with perinatal bereavement                                                              | 109        | -.69                                   | Uren T.H. 2002 <sup>125</sup>          |
| Parent Perception Inventory (PPI)                             | Parents with children with Down's syndrome and controls                                       | 334        | -.46 <sub>p</sub><br>-.54 <sub>p</sub> | Hedov G. 2002 <sup>171</sup>           |
| <i>Perceived stressors</i>                                    |                                                                                               |            |                                        |                                        |
| Brief Symptom Inventory (BSI)                                 | Women referred to a breast health clinic                                                      | 314        | -.15 <sub>s</sub>                      | Gilbar O. 2003 <sup>54</sup>           |
| COPE – Brief                                                  | Students                                                                                      | 202        |                                        | Ebert S. 2002 <sup>42</sup>            |
| - approach coping                                             |                                                                                               |            | .24                                    |                                        |
| - avoidance coping                                            |                                                                                               |            | -.58                                   |                                        |
| COPE                                                          | General population                                                                            | 439        |                                        | Pallant J. 2002 <sup>214</sup>         |
| - behavioural disengagement                                   |                                                                                               |            | -.41                                   |                                        |
| - active                                                      |                                                                                               |            | .37                                    |                                        |
| - plan                                                        |                                                                                               |            | .33                                    |                                        |
| - denial                                                      |                                                                                               |            | -.24                                   |                                        |
| - reinterpretation                                            |                                                                                               |            | .22                                    |                                        |
| - drug                                                        |                                                                                               |            | -.18                                   |                                        |
| - mental disengagement                                        |                                                                                               |            | -.11                                   |                                        |
| - instrumental social support                                 |                                                                                               |            | .10                                    |                                        |
| Coping Strategy Indicator (CSI)                               | College students                                                                              | 52         |                                        | Amirkhan J.H 2003 <sup>1, 324</sup>    |
| - problem-solving                                             |                                                                                               |            | .26                                    |                                        |
| - seeking social support                                      |                                                                                               |            | .14 ns                                 |                                        |
| - avoidance                                                   |                                                                                               |            | -.29                                   |                                        |
| Critical Care Nursing Stress Scale                            | Critical care nurses                                                                          | 35         | -.20 ns                                | Yam B. 2003 <sup>250</sup>             |
| Daily environmental Hassles Scale (DEH)                       | Homeless women and low-income housed women                                                    | 113<br>116 | -.40                                   | Ingram K. 1996 <sup>176</sup>          |
| Evaluating and Nurturing Relationship Issues                  | Israeli Jewish women with disabilities and controls                                           | 94<br>94   | .44 <sub>p</sub>                       | Florian V. 1994 <sup>46</sup>          |
| Communication and Happiness Scale (ENRICH)                    |                                                                                               |            |                                        |                                        |
| Family-COPEs                                                  | Dialysis patients                                                                             | 40         |                                        | Senka J. 1995 <sup>330</sup>           |
| - internal                                                    |                                                                                               |            | .36                                    |                                        |
| Family Crisis-Oriented Personal Scales (F-COPE)               | Israeli Jewish women with disabilities and controls                                           | 94<br>94   |                                        | Florian V. 1994 <sup>46</sup>          |
| - active coping                                               |                                                                                               |            | .44 <sub>p</sub>                       |                                        |
| - passive coping                                              |                                                                                               |            | -.13 <sub>p</sub>                      |                                        |
| Family Impact Questionnaire                                   | Parents with children with autistic spectrum disorders and parents with non-autistic children | 66<br>66   |                                        | Sivberg B. 2002 <sup>325</sup>         |
| - loving care                                                 |                                                                                               |            | -.04 ns                                |                                        |
| - worry                                                       |                                                                                               |            | -.12 ns                                |                                        |
| - stress                                                      |                                                                                               |            | -.34                                   |                                        |
| - guilt-feelings                                              |                                                                                               |            | -.18 ns                                |                                        |
| Family Straits                                                | Dialysis patients                                                                             | 40         | .60                                    | Senka J. 1995 <sup>330</sup>           |
| Hassles and Uplifts Scale                                     | Singaporean subjects                                                                          | 186        | -.35                                   | Bishop GD 1993 <sup>11, 331</sup>      |
| Hassles and Uplifts Scale                                     | Israeli Jewish women with disabilities and controls                                           | 94<br>94   | -.48 <sub>p</sub>                      | Florian V. 1994 <sup>46</sup>          |
| Hassles and Uplifts Scale                                     | French adults                                                                                 | 193        | -.25                                   | Gana K. 2001 <sup>315</sup>            |
| Hassles and Uplifts Scale                                     | Students                                                                                      | 336        | -.46 <sub>p</sub>                      | Smith T.L. 1997 <sup>114</sup>         |
| Jalowiec Coping Scale (JCS-40)                                | Patients with chronic renal failure                                                           | 48         |                                        | Klang B. 1996 <sup>188</sup>           |
| - confrontational                                             |                                                                                               |            | .18 <sub>p</sub> ns                    |                                        |
| - emotive                                                     |                                                                                               |            | -.43 <sub>p</sub>                      |                                        |
| - palliative                                                  |                                                                                               |            | -.32 <sub>p</sub>                      |                                        |
| Nursing Stress Scale (NSS)                                    | Dialysis nurses                                                                               | 238        | -.39 <sub>p</sub>                      | Lewis S. 1992 <sup>69</sup>            |
| Occupational Stress Questionnaire                             | Industrial design personnel                                                                   | 422        |                                        | Toppinen-Tanner S. 2003 <sup>241</sup> |
| - job complexity                                              |                                                                                               |            |                                        |                                        |

|                                          |                                            |     |                      |                                   |
|------------------------------------------|--------------------------------------------|-----|----------------------|-----------------------------------|
| - autonomy                               |                                            |     | .33 <sub>p</sub>     |                                   |
| - role clarity                           |                                            |     | .34 <sub>p</sub>     |                                   |
| - time pressure                          |                                            |     | .47 <sub>p</sub>     |                                   |
| - competence                             |                                            |     | -.08 <sub>p</sub> ns |                                   |
| - psychological symptoms                 |                                            |     | .63 <sub>p</sub>     |                                   |
|                                          |                                            |     | -.66 <sub>p</sub>    |                                   |
| Perceived Stress Scale (PSS-10)          | General population                         | 439 | -.65                 | Pallant J. 2002 <sup>214</sup>    |
| Perceived Stress Scale                   | Students                                   | 336 | -.64 <sub>p</sub>    | Smith T.L. 1997 <sup>114</sup>    |
| Perceived Stress Scale                   | Critical care nurses                       | 35  | -.64                 | Yam B. 2003 <sup>250</sup>        |
| Recent Sexual Harassment Scale           | Homeless women and low-income housed women | 113 | -.29                 | Ingram K. 1996 <sup>176</sup>     |
|                                          |                                            | 116 |                      |                                   |
| Sexual Experiences Survey (SES)          | Homeless women and low-income housed women | 113 | -.26                 | Ingram K. 1996 <sup>176</sup>     |
|                                          |                                            | 116 |                      |                                   |
| Time Management Behavior Scale (TMBS)    | Undergraduate college students             | 137 | .37 - .57            | Shahani C. 1993 <sup>332</sup>    |
| <b>Post Traumatic Stress Disorder</b>    |                                            |     |                      |                                   |
| PTSD-Interview (PTSD-I)                  | Fire fighters                              | 464 |                      | Dudek B. 2000 <sup>41</sup>       |
| - trauma reexperiencing                  |                                            |     | -.19                 |                                   |
| - avoidance                              |                                            |     | -.27                 |                                   |
| - arousal                                |                                            |     | -.24                 |                                   |
| - trauma (global score)                  |                                            |     | -.27                 |                                   |
| Post-Traumatic Stress Scale (PSS)        | Traffic accident victims                   | 51  | -.58 <sub>p</sub>    | Frommberger U. 1999 <sup>49</sup> |
|                                          |                                            |     | -.59 <sub>p</sub>    |                                   |
| Post Traumatic Symptom Scale (PTSS-10)   | Swedish ambulance personnel                | 362 | -.40 <sub>s</sub>    | Jonsson A. 2003 <sup>179</sup>    |
| The Child PTSD Reaction Index (CPTSD-RI) | Juvenile delinquents                       | 159 | -.45                 | Koposov RA. 2003 <sup>23</sup>    |

ns = not significant

<sup>c)</sup> significant, the level not mentioned <sup>h)</sup> partly significant, partly not significant

r<sub>s</sub> = Spearman's rank correlation coefficient r<sub>p</sub> = Pearson's product moment correlation coefficient

### Instruments measuring quality of life and wellbeing

| Measure/Variable                              | Sample                                   | N   | Coeff<br>r            | First author                        |
|-----------------------------------------------|------------------------------------------|-----|-----------------------|-------------------------------------|
| <b>Quality of Life</b>                        |                                          |     |                       |                                     |
| EORTC Quality-of-Life Questionnaire (QOL-C30) | Cancer patients                          | 20  | .67 <sub>s11</sub>    | Wettergren L. 1997 <sup>247</sup>   |
|                                               |                                          |     | .39 <sub>s12</sub> ns |                                     |
|                                               |                                          |     | .17 <sub>s13</sub> ns |                                     |
| Flanagan Quality of Life Scale                | Persons with CHD survived cardiac arrest | 149 | .73                   | Motzer S. 1996 <sup>209</sup>       |
| Flanagan Quality of Life Scale                | Women with IBS and healthy controls      | 324 | .66 <sub>p</sub>      | Motzer Adams S. 2003 <sup>79</sup>  |
| Lancashire Quality of Life Profile (LQOLP)    | Schizophrenic patients                   | 120 | .60 <sub>s</sub>      | Bengtsson-Tops A. 2000 <sup>8</sup> |
| Life Satisfaction checklist (LiSat 9)         | Patients with multiple trauma            | 69  |                       | Anke A. 2003 <sup>138</sup>         |
| - life as a whole                             |                                          |     | .43                   |                                     |
| - sexual life                                 |                                          |     | ns                    |                                     |
| - partner relations                           |                                          |     | .60                   |                                     |
| - family life                                 |                                          |     | .47                   |                                     |
| - contacts with friends                       |                                          |     | .21                   |                                     |
| - vocational situation                        |                                          |     | ns                    |                                     |
| Life Satisfaction Domain Rating               | Patients attending home                  | 28  | .69                   | Horsburgh M.                        |

|                                                                          |                                                                    |            |                                                                                                                            |                                       |
|--------------------------------------------------------------------------|--------------------------------------------------------------------|------------|----------------------------------------------------------------------------------------------------------------------------|---------------------------------------|
| Scale (LSDRS)                                                            | dialysis and their spouses                                         |            |                                                                                                                            | 1998 <sup>57</sup>                    |
| Life Satisfaction Index (LSI)                                            | Older males                                                        | 199        | .44                                                                                                                        | Brooks J.D. 1998 <sup>144</sup>       |
| Life Satisfaction Index Z                                                | Patients attending home dialysis and their spouses                 | 28         | .72                                                                                                                        | Horsburgh M. 1998 <sup>57</sup>       |
| LiSat Checklist                                                          | Patients with severe multiple trauma                               | 26         | .42 <sub>s t1</sub><br>.40 <sub>s t2</sub><br>.57 <sub>s t3</sub>                                                          | Snekkevik H. 2003 <sup>229</sup>      |
| Nottingham Health Profile (NHP)                                          | Patients with lower limb ischaemia and healthy controls            | 112<br>102 | -.51 <sub>s</sub>                                                                                                          | Klevsgård R. 2000 <sup>333</sup>      |
| Psychological Well-Being Subscale, Quality of Life/Breast Cancer Version | African American breast cancer survivors                           | 162        | .59 <sub>s</sub>                                                                                                           | Gibson L. 2003 <sup>323</sup>         |
| Quality of Life                                                          | Middle-aged psychiatric high-risk subjects                         | 148        | .77 <sub>p</sub>                                                                                                           | Cederblad M. 1996 <sup>309</sup>      |
| Quality of Life                                                          | Families with subjects diagnosed with serious illness              | 78         | .55 <sub>p</sub>                                                                                                           | Hoehn Anderson K. 1998 <sup>270</sup> |
| Quality of Life Questionnaire-C30                                        | Men with prostate cancer and men with benign prostatic hyperplasia | 71<br>37   | .52 <sub>s</sub><br>.07 <sub>s ns</sub><br>.71 <sub>s ns</sub><br>.55 <sub>s</sub><br>.50 <sub>s</sub><br>.49 <sub>s</sub> | Jakobsson L. 2002 <sup>177</sup>      |
| - physical                                                               |                                                                    |            |                                                                                                                            |                                       |
| - role                                                                   |                                                                    |            |                                                                                                                            |                                       |
| - emotional                                                              |                                                                    |            |                                                                                                                            |                                       |
| - social                                                                 |                                                                    |            |                                                                                                                            |                                       |
| - cognitive                                                              |                                                                    |            |                                                                                                                            |                                       |
| Satisfaction with Life Domains                                           | General population                                                 | 3515       | .68-.72                                                                                                                    | Schumann A. 2003 <sup>296</sup>       |
| Satisfaction with Life Question                                          | Patients attending home dialysis and their spouses                 | 28         | .60                                                                                                                        | Horsburgh M. 1998 <sup>57</sup>       |
| Satisfaction with Life Scale (SWLS)                                      | Adults with cleft lip                                              | 51         | .74                                                                                                                        | Cochrane W. 1999 <sup>149</sup>       |
| Satisfaction with Life Scale (SWLS)                                      | General population                                                 | 439        | .53                                                                                                                        | Pallant J. 2002 <sup>214</sup>        |
| Satisfaction with Life Scale (SWLS)                                      | General population                                                 | 3515       | .67-.74                                                                                                                    | Schumann A. 2003 <sup>296</sup>       |
| Spiritual Perspective Scale                                              | African American breast cancer survivors                           | 162        | .16 <sub>s</sub>                                                                                                           | Gibson L. 2003 <sup>323</sup>         |
| The World Health Organization Quality of Life Scale (WHOQOL-BREF)        | Patients with total spinal cord transaction and healthy controls   | 20<br>20   |                                                                                                                            | O'Carroll R.E. 2003 <sup>87</sup>     |
| - physical capacity                                                      |                                                                    |            | .69                                                                                                                        |                                       |
| - psychological capacity                                                 |                                                                    |            | .76                                                                                                                        |                                       |
| - social relationships                                                   |                                                                    |            | .62                                                                                                                        |                                       |
| - environment                                                            |                                                                    |            | .74                                                                                                                        |                                       |
| The World Health Organization Quality of Life Scale (WHOQOL-BREF)        | Japanese civil servants                                            | 1392       | .51                                                                                                                        | Nasermoaddeli A. 2003 <sup>334</sup>  |
| - psychological capacity                                                 |                                                                    |            |                                                                                                                            |                                       |
| <b>Wellbeing</b>                                                         |                                                                    |            |                                                                                                                            |                                       |
| Affect Balance Scale (ABS)                                               | Elderly people                                                     | 152        | .67 <sub>p</sub>                                                                                                           | Coward D.D. 1996 <sup>151</sup>       |
| - emotional wellbeing                                                    |                                                                    |            |                                                                                                                            |                                       |
| Affect Balance Scale (ABS)                                               | Older adults                                                       | 119        | .24                                                                                                                        | Smits C. 1995 <sup>297</sup>          |
| - global wellbeing                                                       |                                                                    |            |                                                                                                                            |                                       |
| Cognitive Well-being Scale(CWB)                                          | Elderly people                                                     | 152        | .65 <sub>p</sub>                                                                                                           | Coward D.D. 1996 <sup>151</sup>       |
| - emotional well-being                                                   |                                                                    |            |                                                                                                                            |                                       |
| Index of Marital Satisfaction Scale (IMS)                                | Handicapped and their spouses                                      | 152        | -.38                                                                                                                       | Rena F. 1998 <sup>98</sup>            |
| Perceived Wellness Survey (PWS)                                          | College students                                                   | 112        | .66 <sub>p</sub>                                                                                                           | Adams T.B. 2000 <sup>134</sup>        |

|                                                                   |                                    |     |                                 |                                  |
|-------------------------------------------------------------------|------------------------------------|-----|---------------------------------|----------------------------------|
| Profile of Mood States (POMS-Short form)<br>- emotional wellbeing | Elderly people                     | 152 | -.68 <sub>p</sub>               | Coward D.D. 1996 <sup>151</sup>  |
| Purpose-in-Life Test (PIL)                                        | Elderly people                     | 152 | .73 <sub>p</sub>                | Coward D.D. 1996 <sup>151</sup>  |
| Purpose-in-Life Test (PIL)                                        | University under-graduates         | 151 | .74 <sup>c</sup>                | Edwards M. 2001 <sup>43</sup>    |
| Scales of Psychological Well-being                                | College students with disabilities | 147 | .72 <sup>d</sup>                | Lustig D.C. 2000 <sup>72</sup>   |
| Wellbeing Measure <sup>e)</sup>                                   | Diabetic persons                   | 89  | .87 <sub>p</sub>                | Lundman B. 1993 <sup>321</sup>   |
| Well-being Scale                                                  | HIV-infected patients and controls | 20  | -.65 <sub>p</sub>               | Cederfjäll C. 2001 <sup>29</sup> |
| - positive wellbeing                                              |                                    | 514 | .61 <sub>p</sub> <sup>c</sup>   |                                  |
| - energy                                                          |                                    |     | .53 <sub>p</sub> <sup>d</sup>   |                                  |
|                                                                   |                                    |     | .61 <sub>p</sub> <sup>c,d</sup> |                                  |

<sup>c)</sup> male <sup>d)</sup> female <sup>e)</sup> Interpretation of the scale: the lower the level the higher the well-being.

$r_s$  = Spearman's rank correlation coefficient  $r_p$  = Pearson's product moment correlation coefficient

### Instruments measuring attitudes and behaviours

| Measure/Variable                                  | Sample                                                  | N         | Coeff<br>r                             | First author                       |
|---------------------------------------------------|---------------------------------------------------------|-----------|----------------------------------------|------------------------------------|
| <i>Attitudes towards disability</i>               |                                                         |           |                                        |                                    |
| Acceptance of Disability Scale Modified (ADM)     | Insulin-dependent diabetic subjects                     | 107       | .51 <sub>p</sub>                       | Richardson A. 2001 <sup>100</sup>  |
| Acceptance of Disability Scale                    | Handicapped and spouses                                 | 152       | .67                                    | Rena F. 1998 <sup>98</sup>         |
| Attitudes towards Disability Scale modified (ADM) | Swedish patients with EDS                               | 77        | .59                                    | Berglund B. 2003 <sup>9</sup>      |
| Rheumatology Attitudes Index (RAI)                | Patients with rheumatoid arthritis (RA)                 | 828       | -.43 <sup>a</sup><br>-.39 <sup>b</sup> | Callahan L. 1995 <sup>20</sup>     |
| <i>Coping ability</i>                             |                                                         |           |                                        |                                    |
| Defence Style Questionnaire (DSQ, Bond's)         | Psychiatric outpatients and community controls          | 441       |                                        | Sammallahti P. 1996 <sup>105</sup> |
| - mature defence style                            |                                                         |           | .31 <sub>p</sub>                       |                                    |
| - neurotic defence style                          |                                                         |           | -.20 <sub>p</sub>                      |                                    |
| - borderline defence style                        |                                                         |           | -.78 <sub>p</sub>                      |                                    |
| <i>Health belief</i>                              |                                                         |           |                                        |                                    |
| Health Belief Scale (HBS)                         | General polish population                               | 60        |                                        | Pasikowski T. 1994 <sup>335</sup>  |
| - bio-medical model (BM)                          |                                                         |           | -.12 <i>ns</i>                         |                                    |
| - holistic-functional (HF) model                  |                                                         |           | .25                                    |                                    |
| - HF-BM model                                     |                                                         |           | .27                                    |                                    |
| Health Opinion Survey (HOS)                       | Daughters of women with breast cancer and healthy women | 45<br>51  | .32 <sub>p</sub>                       | Gilbar O. 1998 <sup>53</sup>       |
| <i>Social skills</i>                              |                                                         |           |                                        |                                    |
| Career Thoughts Inventory                         | Female college students                                 | 145       | -.35                                   | Lustig D. 2002 <sup>73</sup>       |
| - Decision Making Confusion Scale                 |                                                         |           | -.31                                   |                                    |
| - Commitment Anxiety Scale                        |                                                         |           | -.37                                   |                                    |
| - External Conflict Scale                         |                                                         |           | -.29                                   |                                    |
| Florida Health and Family Life Instrument         | Refugees                                                | 2234      |                                        | Ying Y-W. 1997 <sup>314</sup>      |
| - psychosocial dysfunction                        |                                                         |           | .32                                    |                                    |
| Health Survey Questionnaire (SF-36)               | Patients with RA and traffic accident victims           | 89<br>112 |                                        | Schnyder U. 1999 <sup>109</sup>    |
| - social functioning                              |                                                         |           | .37 <sub>p</sub>                       |                                    |

|                                                    |                                                     |       |                                                                |                                   |
|----------------------------------------------------|-----------------------------------------------------|-------|----------------------------------------------------------------|-----------------------------------|
| Interview Schedule for Social Interaction          | HIV-infected patients and controls                  | 514   | .20 <sub>p</sub> <sup>a</sup><br>.60 <sub>p</sub> <sup>b</sup> | Cederfjäll C. 2001 <sup>29</sup>  |
| Multidimensional Scale of Perceived Social Support | Patients with acute myocardial infarction           | 290   | .51                                                            | Drory Y. 1999 <sup>320</sup>      |
| Multidimensional Scale of Perceived Social Support | Israeli Jewish women with disabilities and controls | 94    | .60 <sub>p</sub>                                               | Florian V. 1994 <sup>46</sup>     |
| The Perceived Competence Scale for Children        | Adult family members                                | 456   |                                                                | Cederblad M. 2003 <sup>28</sup>   |
| - social                                           |                                                     |       | .13                                                            |                                   |
| - school                                           |                                                     |       | .17                                                            |                                   |
| The Perceived Social Support Index (PSS)           | Canadians                                           | 17626 | .21 <sub>p</sub>                                               | Wolff A.C. 1999 <sup>249</sup>    |
| Personal Views Survey                              | Students                                            | 336   | .43 <sub>p</sub>                                               | Smith T.L. 1997 <sup>114</sup>    |
| Social Activities and Distress Scale (SADS)        | Adult with cleft lip                                | 51    | -.69                                                           | Cochrane W. 1999 <sup>149</sup>   |
| Social Desirability Scale (SDS)                    | Occupational therapy students and controls          | 71    | .31 <sub>s</sub>                                               | Bränholm I-B. 1998 <sup>18</sup>  |
| Social Desirability Scale (SDS)                    | General population                                  | 651   |                                                                | Pallant J. 2002 <sup>214</sup>    |
| Social Health Scale (SHS)                          | Older males                                         | 439   | .26                                                            | Brooks J.D. 1998 <sup>144</sup>   |
| Social Inadequacy Scale                            | Older adults                                        | 199   | .27                                                            | Smits C. 1995 <sup>297</sup>      |
| Social Support Appraisal Scale (SS-A)              | General population                                  | 90    | -.21                                                           | Schumann A. 2003 <sup>296</sup>   |
| Social Support Index                               | Adult college students                              | 3515  | .55-.59                                                        | Flannery R.B. 1994 <sup>317</sup> |
| Social Support Questionnaire                       | Homeless women and low-income housed women          | 105   | -.47                                                           | Ingram K. 1996 <sup>176</sup>     |
| - satisfaction                                     |                                                     | 113   |                                                                |                                   |
| - number                                           |                                                     | 116   | .42                                                            |                                   |
| Social Support Scale                               | Homeless drug-abusing minority women                |       | .08 ns                                                         | Nyamathi A. 1992 <sup>292</sup>   |
| Work Personality Profile Self-Report (WPP-SR)      | College students                                    | 581   | .14 <sub>p</sub>                                               | Strauser D. 2003 <sup>115</sup>   |
| - task orientation                                 |                                                     | 156   |                                                                |                                   |
| - social skills                                    |                                                     |       | .32 <sub>p</sub>                                               |                                   |
| - work motivation                                  |                                                     |       | .26 <sub>p</sub>                                               |                                   |
| - work conformance                                 |                                                     |       | .23 <sub>p</sub>                                               |                                   |
| - personal presentation                            |                                                     |       | .42 <sub>p</sub>                                               |                                   |
|                                                    |                                                     |       | .28 <sub>p</sub>                                               |                                   |

a) SOC-29 b) SOC-13 ns = not significant  $r_s$  = Spearman's rank correlation coefficient  $r_p$  = Pearson's product moment correlation coefficient t = time

Table 6. Sense of Coherence Scale: means and standard deviation of the subscales from published studies 1992- 2003.

| SOC items | Comprehensibility<br>M (SD)            | Manageability<br>M (SD)                | Meaningfulness<br>M (SD)               | First author                       |
|-----------|----------------------------------------|----------------------------------------|----------------------------------------|------------------------------------|
| 9         | 2.85 ( 0.2)                            | 2.69 ( 0.3)                            | 2.80 ( 0.3)                            | Forsgårde M. 2000 <sup>265</sup>   |
|           | 2.83 ( 0.3)                            | 2.63 ( 0.3)                            | 2.80 ( 0.2)                            |                                    |
|           | 2.78 ( 0.3)                            | 2.58 ( 0.4)                            | 2.67 ( 0.3)                            |                                    |
|           | 2.68 ( 0.4)                            | 2.56 ( 0.4)                            | 2.69 ( 0.3)                            |                                    |
| 13        | 23.50 ( 3.8)                           | 25.00 ( 3.4)                           | 23.80 ( 3.6)                           | Ekman I. 2002 <sup>155</sup>       |
|           | 24.40 ( 3.7)                           | 25.00 ( 3.4)                           | 24.20 ( 3.7)                           |                                    |
| 13        | 65.00 <sup>a</sup> (21.8) <sup>b</sup> | 72.40 <sup>a</sup> (21.6) <sup>b</sup> | 76.10 <sup>a</sup> (20.3) <sup>b</sup> | Guldvog B. 1999 <sup>168</sup>     |
| 13        | 22.60 ( 5.1)                           | 18.80 ( 3.6)                           | 19.70 ( 4.0)                           | Tang S.T. 2002 <sup>240</sup>      |
|           | 22.50 ( 4.9)                           | 18.20 ( 3.8)                           | 20.00 ( 4.0)                           |                                    |
| 13        | 27.35 ( 5.4)                           | 22.01 ( 4.4)                           | 23.02 ( 4.1)                           | Wells Y.D. 1997 <sup>245</sup>     |
|           | 25.88 ( 5.4)                           | 20.89 ( 5.1)                           | 21.77 ( 4.3)                           |                                    |
| 13        | 21.04 <sup>b</sup> ( 3.9) <sup>b</sup> | 20.72 <sup>b</sup> ( 4.3) <sup>b</sup> | 28.80 <sup>c</sup> ( 6.0) <sup>b</sup> | Abrahamsson A. 2002 <sup>131</sup> |
| 26-F      | 37.08 ( 8.9)                           | 43.10 ( 9.7)                           | 44.38 ( 8.4)                           | Hoehn Andersson K.                 |

|    |                                        |                                        |                                        |                                   |
|----|----------------------------------------|----------------------------------------|----------------------------------------|-----------------------------------|
|    |                                        |                                        |                                        | 1998 <sup>270</sup>               |
| 29 | 50.80 (12.2)                           | 52.50 (10.2)                           | 40.90 ( 9.2)                           | Büchi S. 1998 <sup>19</sup>       |
| 29 | 34.38 ( 8.3)                           | 36.53 ( 8.3)                           | 29.66 ( 9.7)                           | Carstens J. 1997 <sup>21</sup>    |
|    | 45.24 ( 9.8)                           | 49.26 ( 9.5)                           | 42.74 ( 7.2)                           |                                   |
| 29 | 49.26 ( 7.5)                           | 46.17 ( 5.0)                           | 50.96 ( 8.1)                           | Cilliers F. 2003 <sup>32</sup>    |
| 29 | 50.32 ( 9.0)                           | 53.01 ( 7.4)                           | 45.12 ( 5.8)                           | Dudek B. 2000 <sup>41</sup>       |
| 29 | 39.55 ( 8.3)                           | 34.04 ( 6.5)                           | 32.00 ( 4.5)                           | Ekblad S. 1997 <sup>336</sup>     |
| 29 | 45.50 (10.5)                           | 48.70 (10.5)                           | 42.00 ( 8.4)                           | Lustig D. 2000 <sup>72</sup>      |
| 29 | 43.60 (10.0)                           | 46.93 ( 8.7)                           | 41.30 ( 7.6)                           | Pasikowski T. 1994 <sup>335</sup> |
| 29 | 41.58 <sup>h</sup> (0.88) <sup>g</sup> | 41.50 <sup>i</sup> (1.06) <sup>g</sup> | 36.48 <sup>i</sup> (1.16) <sup>g</sup> | Sandell R. 1998 <sup>106</sup>    |
|    | 44.88 <sup>h</sup> (0.82) <sup>g</sup> | 45.40 <sup>i</sup> (0.98) <sup>g</sup> | 40.32 <sup>j</sup> (1.14) <sup>g</sup> |                                   |
|    | 53.13 <sup>h</sup> (0.82) <sup>g</sup> | 55.20 <sup>i</sup> (0.86) <sup>g</sup> | 45.04 <sup>j</sup> (0.90) <sup>g</sup> |                                   |
|    | 47.96 <sup>h</sup> (0.82) <sup>g</sup> | 51.80 <sup>i</sup> (0.92) <sup>g</sup> | 42.88 <sup>j</sup> (1.05) <sup>g</sup> |                                   |

a) adjusted scale range 0-100 b) here multiplied by 4 c) here multiplied by 5 g) SD cannot be corrected h) here multiplied by 11 i) here multiplied by 10 j) here multiplied by 8

Table 7. Sense of Coherence Scale: Gender differences in means and standard deviation from published studies 1992-2002.

| SOC Items | Sample                                                          | N                 | Men M (SD)                                      | Women M (SD)                                    | Diff ±               | First author                           |
|-----------|-----------------------------------------------------------------|-------------------|-------------------------------------------------|-------------------------------------------------|----------------------|----------------------------------------|
| 7         | Finns                                                           | 1861              | 22.18 ( 0.19)                                   | 22.25 ( 0.18)                                   | 0.07                 | Niemelä M. 2002 <sup>291</sup>         |
| 9         | Substance abusers                                               | 60                | 2.71 ( 0.60)                                    | 2.44 ( 0.60)                                    | 0.27                 | Andersen S. 2001 <sup>253</sup>        |
| 9         | Employees                                                       | 2053              | 78.84 (14.25)                                   | 82.04 (12.57)                                   | 3.20                 | Albertsen K. 2001 <sup>251</sup>       |
| 9         | Government employees                                            | 763               | 47.27 ( 7.26)                                   | 46.12 ( 7.32)                                   | 1.15                 | Kivimäki M. 1997 <sup>275</sup>        |
| 9         | Older adults                                                    | 952               | 36.30 ( 4.30)                                   | 35.60 ( 4.50)                                   | 0.70                 | Midanik L.T. 1992 <sup>288</sup>       |
| 13        | Patients with hypertension                                      | 238               | 58.90                                           | 67.90                                           | 9.00                 | Anson O. 1993 <sup>140</sup>           |
| 13        | Family care-givers                                              | 305               | 67.50 (13.20)                                   | 69.30 (12.50)                                   | 1.80                 | Chumbler N. 2003 <sup>148</sup>        |
| 13        | Former workers                                                  | 344               | 67.90 (12.24)                                   | 66.50 (12.05)                                   | 1.40                 | Johansson Hanse J. 1999 <sup>178</sup> |
| 13        | Municipal employees                                             | 2991              | 4.93 ( 0.79)                                    | 4.97 ( 0.80)                                    | 0.04                 | Kivimäki M. 2002 <sup>186</sup>        |
| 13        | Swedes                                                          | 2003              | 65.04 (10.39)                                   | 64.02 (11.36)                                   | 1.02                 | Larsson G. 1996 <sup>196</sup>         |
| 13        | General population                                              | 1254              | 70.73 <sub>11</sub> 68.70 <sub>12</sub>         | 70.92 <sub>11</sub> 69.04 <sub>12</sub>         | 0.19<br>0.34         | Nilsson B. 2003 <sup>212</sup>         |
| 13        | Parents with children with intellectual disability and controls | 259<br>109<br>381 | 69.10 (11.90)<br>65.20 (12.00)<br>69.50 (10.80) | 64.40 (14.50)<br>59.90 (14.40)<br>69.10 (10.80) | 4.70<br>5.30<br>0.40 | Olsson M.B. 2002 <sup>213</sup>        |
| 13        | Swedish ambulance personnel                                     | 362               | 69.90 ( 8.57)<br>65.57 (10.30)                  | 70.54 (9.72)<br>66.30 (9.93)                    | 0.64<br>0.73         | Jonsson A. 2003 <sup>179</sup>         |
| 13        | Diabetic patients                                               | 88                | 73.90 (12.10)                                   | 71.00 (11.70)                                   | 2.90                 | Sandén-Eriksson B. 2000 <sup>221</sup> |
| 13        | Unemployed people                                               | 1249              | 54.41 (14.10)                                   | 55.19 (14.20)                                   | 0.78                 | Starrin B. 2001 <sup>232</sup>         |
| 13        | General population                                              | 21101             | 68.44<br>63.98<br>59.22<br>55.25<br>51.94       | 67.26<br>62.33<br>58.29<br>53.70<br>49.78       |                      | Suominen S. 2002 <sup>236</sup>        |
| 13        | Employees                                                       | 103               | 67.00 <sup>a</sup>                              | 66.00 <sup>a</sup>                              | 1.00                 | Söderfeldt M. 2000 <sup>238</sup>      |
| 16        | Finns                                                           | 3115              | 9.55 ( 1.17)                                    | 9.50 ( 1.20)                                    | 0.05                 | Suominen S. 1993 <sup>301</sup>        |
| 29        | Patients with musculoskeletal pain                              | 189               | 155.00 (23.00)                                  | 149.00 (24.00)                                  | 6.00                 | Atroshi I. 2002 <sup>2</sup>           |
| 29        | College students                                                | 294               | 4.33 ( 0.59)<br>4.85 ( 0.57)                    | 4.22 ( 0.54)<br>4.46 ( 0.72)                    | 0.11<br>0.39         | Ben-David A. 1996 <sup>5</sup>         |
| 29        | Schizophrenic patients                                          | 120               | 134.00 (13.00)                                  | 123.00 (53.00)                                  | 11.00                | Bengtsson-Tops A. 2000 <sup>8</sup>    |
| 29        | HIV-infected patients and healthy controls                      | 189<br>145        | 142.00 (23.00)<br>152.00 (17.00)                | 133.00 (20.00)<br>151.00 (19.00)                | 9.00<br>1.00         | Cederfjäll C. 2001 <sup>25</sup>       |
| 29        | University under-graduates                                      | 298               | 133.21 (20.35)                                  | 132.91 (19.92)                                  | 0.30                 | Edwards M.J. 2001 <sup>43</sup>        |
| 29        | Kibbutz members                                                 | 228<br>209        | 150.80 (19.80)<br>147.10 (19.10)                | 146.40 (22.90)<br>142.30 (20.00)                | 4.40<br>4.80         | Kark J.D. 1996 <sup>60</sup>           |
| 29        | Cancer patients and                                             | 42                | 158.00 (17.00)                                  | 137.00 (22.00)                                  | 21.00                | Langius A. 1994 <sup>66</sup>          |



|    | healthy controls                                    |          |                              |                              |              |                                |
|----|-----------------------------------------------------|----------|------------------------------|------------------------------|--------------|--------------------------------|
| 29 | Parents of handicapped and non-handicapped children | 78<br>83 | 5.09 ( 0.66)<br>5.24 ( 0.62) | 4.81 ( 0.86)<br>5.04 ( 0.58) | 0.28<br>0.20 | Margalit M. 1992 <sup>76</sup> |
| 29 | Swedish employees                                   | 194      | 151.00 (17.00)               | 145.00 (18.00)               | 6.00         | Runeson R. 2003 <sup>101</sup> |
| 29 | College students                                    | 270      | 132.30 (21.10)               | 129.80 (20.70)               | 2.50         | Skirka N. 2000 <sup>115</sup>  |
| 29 | Multicultural group of subjects                     | 550      | 139.57 (21.18)               | 134.07 (21.83)               | 5.50         | Wissing M. 2002 <sup>126</sup> |
| 29 | Nondiabetic older adults                            | 73       | 158.60 (17.40)               | 141.90 (26.30)               | 16.70        | Zhang J. 2001 <sup>127</sup>   |
|    |                                                     | 69       | 158.90 (17.80)               | 141.20 (24.60)               | 17.70        |                                |
|    |                                                     |          | 164.50 (17.10)               | 160.50 (22.10)               | 4.00         |                                |
|    |                                                     |          | 161.70 (15.50)               | 159.90 (21.70)               | 1.80         |                                |

<sup>a)</sup> SOC index transformed to range between 0 and 100; t = time

Table 8. Sense of Coherence Scale: Divisions into low to high based on published studies 1992-2003.

| SOC-29 (7-point Likert scale range from 29-203)                                                 | First author                       |
|-------------------------------------------------------------------------------------------------|------------------------------------|
| Weak vs strong, cut point = median                                                              | Amirkhan J.H. 2003 <sup>1</sup>    |
| Low = percentiles 1-33, high = percentiles 67-100                                               | Cederblad M. 2003 <sup>28</sup>    |
| Low = below median, high = above median                                                         | Gibson L.M. 1997 <sup>337</sup>    |
| Low = 113.1 points, medium = 135.6 point, high = 158.1 point                                    | Jorgensen R.S. 1999 <sup>58</sup>  |
| Weak, moderate, strong - quartiles                                                              | Karlsson I. 2000 <sup>184</sup>    |
| Low/weak = 25 %, moderate = 50 %, high = 25 % - percentiles                                     | Langius A. 1996 <sup>67</sup>      |
| Lower = mean 101.37, middle = mean 141.15, upper = mean 168.30                                  | McSherry W.C. 1994 <sup>338</sup>  |
| Unfavorable = ≤ 136 points, intermediate = ≥ 137 - ≤ 148 points, favorable = ≥ 149 points       | Nilsson B. <sup>84</sup>           |
| Lowest, rather low, medium, rather high, highest (quintiles)                                    | Poppius E. 1999 <sup>92</sup>      |
| Weak, moderate, strong (tertiles)                                                               | Poppius E. 2003 <sup>93</sup>      |
| Low/high Cut point = median score                                                               | Rena F. 1998 <sup>98</sup>         |
| Low = ≤ 136 points, high = ≥ 136 points                                                         | Shiu A. T-Y. 1998 <sup>112</sup>   |
| Low = 0-10 %, middle high = 45-55 %, high = 90-100%                                             | Svartvik L. 2002 <sup>117</sup>    |
| SOC-13 (7-point Likert scale range from 13-91)                                                  | First author                       |
| Low = mean score or lower, high = higher than mean score                                        | Abel T. Et al 1999 <sup>132</sup>  |
| Low = 1.0-4.4 points, <middle = 4.5-5.0 points, >middle = 5.1-5.6 points, high = 5.7-7.0 points | Due E.P. et al 1998 <sup>152</sup> |
| Group 1 = 23-39 points, group 2 = 40-56 points, group 3 = 57-73 points, group 4 = 74-90 points  | Feldt T. 2000 <sup>339</sup>       |

|                                                                                      |                                                                         |
|--------------------------------------------------------------------------------------|-------------------------------------------------------------------------|
| Low = 20-50 points, moderate = 51-70 points, high = 71-88 points (quartiles)         | Gottlieb A. 1998 <sup>166</sup>                                         |
| Weak = < 63 points, medium = 64-72 points, strong = 72 points                        | Harri M. 1998 <sup>169</sup>                                            |
| Weak = 27-60 points, moderate = 61-74 points, strong = 75-87 points                  | Hedov G. 2002 <sup>171</sup>                                            |
| Low=0-55 points, medium=56-65 points, high=66-78 points                              | Ibrahim S. 2001 <sup>340</sup>                                          |
| Low = below the median, high = above the median                                      | Johansson Hanse 1999 <sup>178</sup>                                     |
| High = $\geq 74.77$ -76.77 points (VAS/adjusted scale range 1-100 mm)                | Karlsson I. 2002 <sup>61</sup>                                          |
| Weak=42-59 points (25%), moderate=60-77 points (50%), strong=78-83 points (25%)      | Klang B. 1996 <sup>189</sup>                                            |
| Low, high – cut off = median                                                         | Korotkov D.L. 1993 <sup>341</sup>                                       |
| Low, high/medium dichotomised at the lower tertile                                   | Krantz G. 2000 <sup>193</sup>                                           |
| Low/weak = 25 %, moderate = 50 %, high = 25 % - percentiles                          | Langius A. 1993 <sup>65</sup> , 1994 <sup>66</sup> , 1996 <sup>67</sup> |
| Weak = 35-60 points, moderate = 61-75 points, strong = 76-91 points                  | Mendel B. 2001 <sup>208</sup>                                           |
| Low = $\leq 69$ points, high = $\geq 69$ points (median)                             | Olsson M.B. 2002 <sup>213</sup>                                         |
| Low = 13-19 points, moderate = 40-65 points, high = 66-91 points                     | Persson D. 1999 <sup>342</sup>                                          |
| Low = < 49 points                                                                    | Starrin B. 2001 <sup>232</sup>                                          |
| High = $\geq 67$ points                                                              | Stephens T. 1999 <sup>234</sup>                                         |
| <b>SOC-modified scales</b>                                                           |                                                                         |
| Low = 3-6 points, high 0-2 points (SOC-3, 3 reply choices)                           | Avlund K. 2003 <sup>255</sup>                                           |
| Low = 3-6 points, high 0-2 points (SOC-3, 3 reply choices)                           | Berntsson L. 2000 <sup>261</sup>                                        |
| High = $\geq 60$ points (SOC-12)                                                     | Eriksson N-G. 1996 <sup>264</sup>                                       |
| Poor = 3 points or more                                                              | Grøholt E-K. 2003 <sup>266</sup>                                        |
| Low = 3-6 points, medium = 1-2 points, high = 0 point (SOC-3, 3-point scale)         | Jahnsen R. 2002 <sup>272</sup>                                          |
| Low = below the median, high = above the median (SOC-9, 3 reply choices)             | Johansson I. 1998 <sup>343</sup>                                        |
| Low = 0-2, 3+, high = 0, 1+ (SOC-3, 3 reply choices)                                 | Lundberg O. 1994 <sup>283</sup> , 1995 <sup>284</sup>                   |
| Weak, strong In this study low scores = strong SOC (SOC-9, 5-point scale)            | Larsson G. 1994 <sup>281</sup>                                          |
| Low = < 31 points, moderate = 31-39 points, high 40-45 points (SOC-9, 5-point scale) | Midanik L.T. 1992 <sup>288</sup>                                        |
| Low = > 0 point, high/perfect = 0 point (SOC-3, 3 reply choices)                     | Ristner G. 2000 <sup>344</sup>                                          |
| Low = > 0 (SOC-3, 5 response choices)                                                | Sundquist J. 2000 <sup>300</sup>                                        |
| Low and high – two groups of equal size (SOC-16, 4-point scale)                      | Suominen S. 1999 <sup>302</sup>                                         |
| Low, medium, high – groups of equal size (SOC-16, 4-point scale)                     | Suominen S. 2001 <sup>303</sup>                                         |

## References

1. Amirkhan JH, Greaves H. *Sense of coherence and stress: The mechanics of a healthy disposition*. Psychology and Health 2003;**18**(1):31-62.
2. Atroshi I, Andersson IH, Gummesson C, Leden I, Odenbring S, Ornstein E. *Primary care patients with musculoskeletal pain*. Scandinavian Journal of Rheumatology 2002;**31**:239-244.
3. Baker LK. *Sense of coherence in adolescents with cystic fibrosis*. In: McCubbin HI TE, Thompson AI, Fromer JE, ed., editor. In: Stress, coping, and health in families. Sense of coherence and resiliency. Thousand Oaks: Sage Publications; 1998. p. 145-168.
4. Begerow B, Pfeifer M, Pospeschill M, Scholz M, Schlotthauer T, Lazarescu A, et al. *Time since vertebral fracture: An important variable concerning quality of life in patients with postmenopausal osteoporosis*. Osteoporosis International 1999;**10**(1):26-33.
5. Ben-David A. *Cross-cultural differences between Russian immigrants and Israeli college students: The effect of the family on the sense of coherence*. Israel Journal of Psychiatry and Relative Science 1996;**33**(1):13-20.

6. Ben David A, Erez Darvish T. *The effect of the family on the emotional life of Ethiopian immigrant adolescents in boarding schools in Israel*. Residential Treatment for Children and Youth 1997;**15**(2):39-50.
7. Ben-David A, Leichtenritt R. *Ethiopian and Israeli students' adjustment to college: The effect of the family, social support and individual coping styles*. Journal of Comparative Family Studies 1999;**30**(2):297-314.
8. Bengtsson-Tops A, Hansson L. *The validity of Antonovsky's sense of coherence measure in a sample of schizophrenic patients living in the community*. Journal of Advanced Nursing 2001;**33**(4):432-438.
9. Berglund B. *Living with Ehlers-Danlos syndrome*. [Doctoral thesis.]. Stockholm: Karolinska Institutet and Sophiahemmet University College, Department of Nursing.; 2003.
10. Bigler M, Neimeyer GJ, Brown E. *The divided self revisited: Effects of self-concept clarity and self-concept differentiation on psychological adjustment*. Journal of Social and Clinical Psychology 2001;**20**(3):396-415.
11. Bishop GD. *The sense of coherence as a resource in dealing with stress*. Psychologia 1993;**36**:259-263.
12. Björvell H, Aly A, Langius A, Nordström G. *Indicators of changes in weight and eating behavior in severely obese patients treated in a nursing behavioral-Program*. International Journal of Obesity 1994;**18**(8):521-525.
13. Blomberg J, Lazar A, Sandell R. *Long-term outcome of long-term psychoanalytically oriented therapies: First findings of the Stockholm outcome of psychotherapy and psychoanalysis study*. Psychotherapy Research 2001;**11**(4):361-382.
14. Boman L, Björvell H, Langius A, Cedermark B. *Two models of care as evaluated by a group of women operated on for breast cancer with regard to their perceived well-being*. European Journal of Cancer Care 1999;**8**:87-96.
15. Botha KF, Du Plessis WF, Van Rooyen JM, Wissing MP. *Biopsychosocial determinants of self-management in culturally diverse South African patients with essential hypertension*. Journal of Health Psychology 2002;**7**(5):519-531.
16. von Bothmer MIK, Fridlund B. *Self-rated health among university students in relation to sense of coherence and other personality traits*. Scandinavian Journal of Caring Sciences 2003;**17**(4):347-357.
17. Bowman BJ. *Cross-cultural validation of Antonovsky's sense of coherence scale*. Journal of Clinical Psychology 1996;**52**(5):547-549.
18. Bränholm I-B, Fugl-Meyer AR, Frölunde A. *Life satisfaction, sense of coherence and locus of control in occupational therapy students*. Scandinavian Journal of Occupational Therapy 1998;**5**:39-44.
19. Büchi S, Sensky T, Allard S, Stoll T, Schnyder U, Klaghofer R, et al. *Sense of coherence - A protective factor for depression in rheumatoid arthritis*. The Journal of Rheumatology 1998;**25**(5):869-875.
20. Callahan LF, Pincus T. *The sense of coherence scale in patients with rheumatoid arthritis*. Arthritis Care and Research 1995;**8**(1):28-35.
21. Carstens JA, Spangenberg JJ. *Major depression: A breakdown in sense of coherence?* Psychological Reports 1997(**80**):1211-1220.
22. Cederblad M, Dahlin L, Hagnell O, K H. *Coping with life span crises in a group at risk of mental and behavioral disorders: from the Lundby study*. Acta Psychiatrica Scandinavica 1995;**91**:322-330.
23. Cederblad M. *The children of the Lundby study as adults: A salutogenic perspective*. European Child & Adolescent Psychiatry 1996;**5**:38-43.

24. Cederblad M, Hansson K. *Sense of coherence--a concept influencing health and quality of life in a Swedish psychiatric at-risk group*. Israel Journal of Medicine and Science 1996;**32**(3-4):194-9.
25. Cederblad M, Dahlin L, Hagnell O, Hansson K. *Salutogenic childhood factors reported by middle-aged individuals - Follow-up of the children from the Lundby Study grown up in families experiencing 3 or more childhood psychiatric risk-factors*. European Archives of Psychiatry and Clinical Neuroscience 1994;**244**(1):1-11.
26. Dahlin L, Cederblad M. *Salutogenesis--protective factors for individuals brought up in a high-risk environment with regard to the risk for a psychiatric or social disorder*. Nordic Journal of Psychiatry 1993;**47**(1):53-60.
27. Cederblad M, Pruksachatkunakorn P, Boripunkul T, Höök B. *Behaviour problems and competence in Thai children and youths: Teachers', parents' and subjects' perspectives*. Transcultural Psychiatry 2001;**38**(1):64-79.
28. Cederblad M, Pruksachatkunakorn P, Boripunkul T, Intraprasert S, Hook B. *Sense of coherence in a Thai sample*. Transcult Psychiatry 2003;**40**(4):585-600.
29. Cederfjäll C, Langius-Eklöf A, Lidman K, Wredling R. *Gender differences in perceived health-related quality of life among patients with HIV infection*. AIDS Patient Care and STDS 2001;**15**(1):31-39.
30. Cederfjäll C, Langius-Eklöf A, Lidman K, Wredling R. *Self-reported adherence to antiretroviral treatment and degree of sense of coherence in a group of HIV-infected patients*. AIDS Patient Care and STDS 2002;**16**(12):609-616.
31. Chamberlain K, Petrie K, Azariah R. *The role of optimism and sense of coherence in predicting recovery following surgery*. Psychology and Health 1992;**7**:301-310.
32. Cilliers F. *Burnout and salutogenic functioning of nurses*. Curationis 2003;**26**(1):62-74.
33. Cohen O. *On the origins of a sense of coherence: Sociodemographic characteristics, or narcissism as a personality trait*. Social Behavior and Personality 1997;**25**(1):49-58.
34. Cohen O, Dekel R. *Sense of coherence, ways of coping, and well being of married and divorced mothers*. Contemporary Family Therapy 2000;**22**(4):467-485.
35. Cohen O, Savaya R. *Sense of coherence and adjustment to divorce among Muslim Arab citizens of Israel*. European Journal of Personality 2003;**17**:309-326.
36. Dalbokova D, Tzenova B, Ognjanova V. *Stress states in nuclear operators under conditions of shiftwork*. Work & Stress 1995;**9**(2/3):305-313.
37. Dangoor N, Florian V. *Women with chronic physical disabilities: correlates of their long-term psychosocial adaptation*. International Journal of Rehabilitation Research 1994;**17**:159-168.
38. Delbar V, Benor DE. *Impact of a nursing intervention on cancer patients' ability to cope*. Journal of Psychosocial Oncology 2001;**19**(2):57-75.
39. Drory Y, Kravetz S, Hirschberger G. *Long-term mental health of men after a first acute myocardial infarction*. Arch Phys Med Rehabil 2002;**83**:352-359.
40. Dudek B, Makowska Z. *Psychometric characteristics of the orientation to life questionnaire for measuring the sense of coherence*. Polish Psychological Bulletin 1993;**24**(4):309-318.
41. Dudek B, Koniarek J. *Relationship between sense of coherence and post-traumatic stress disorder symptoms among firefighters*. International Journal of Occupational Medicine and Environmental Health 2000;**13**(4):299-305.
42. Ebert SA, Tucker DC, Roth DL. *Psychological resistance factors as predictors of general health status and physical symptom reporting*. Psychology, Health & Medicine 2002;**7**(3):363-375.

43. Edwards MJ, Holden RR. *Coping, meaning in life, and suicidal manifestations: Examining gender differences*. Journal of Clinical Psychology 2001;**57**(12):1517-1534.
44. Fiorentino LM. *Sense of coherence and the stress-illness relationship among employees: A prospective study*. In: In: McCubbin HI TE, Thompson AI, Fromer JE, editor. Stress, coping, and health in families. Sense of coherence and resiliency. Thousand Oaks: Sage Publications; 1998.
45. Flick LH, Homan SM. *Sense of coherence as a predictor of family functioning and child problems. Preliminary findings among homeless, substance-abusing women with children*. In: McCubbin HI, Thompson EA, Thompson AI, Fromer JE, editors. Stress, coping, and health in families. Sense of coherence and resiliency. Thousand Oaks California: Sage Publications; 1998.
46. Florian V, Dangoor N. *Personal and familial adaptation of women with severe physical disabilities: A further validation of the double ABCX model*. Journal of Marriage & Family 1994;**56**(August):735-746.
47. Frenz AW, Carey MP, Jorgensen RS. *Psychometric evaluation of Antonovsky's sense of coherence scale*. Psychological Assessment 1993;**5**(2):145-153.
48. Friborg O, Hjemdal O, Rosenvinge JH, Martinussen M. *A new rating scale for adult resilience: what are the central protective resources behind healthy adjustment?* International Journal of Methods in Psychiatric Research 2003;**12**(2):65-76.
49. Frommberger U, Stieglitz R-D, Straub S, Nyberg E, Schlickewei W, Kuner E, et al. *The concept of "sense of coherence" and the development of posttraumatic stress disorder in traffic accident victims*. Journal of Psychosomatic Research 1999;**46**(4):343-348.
50. Gallagher TJ, Wagenfeld MO, Baro F, Haepers K. *Sense of coherence, coping and caregiver role overload*. Social Science and Medicine 1994;**39**(12):1615-1622.
51. Gana K, Garnier S. *Latent structure of the sense of coherence scale in a French sample*. Personality and Individual Differences 2001;**31**:1079-1090.
52. Gibson LM. *Inter-relationships among sense of coherence, hope, and spiritual perspective (inner resources) of African-American and European-American breast cancer survivors*. Applied Nursing Research 2003;**16**(4):236-244.
53. Gilbar O, Borovik R. *How daughters of women with breast cancer cope with the threat of the illness*. Behavioral Medicine 1998;**24**(3):115-121.
54. Gilbar O. *Do attitude toward cancer, sense of coherence and family high risk predict more psychological distress in women referred for a breast cancer examination?* Women & Health 2003;**38**(2):35-46.
55. Hawley DJ, Wolfe F, Cathey MA. *The sense of coherence questionnaire in patients with rheumatic disorders*. The Journal of Rheumatology 1992;**19**:1912-1918.
56. Hittner JB. *Novel methods for analyzing multifaceted personality scales: Sense of coherence and depression as an example*. Journal of Psychology Interdisciplinary & Applied 2000;**134**(2):199-210.
57. Horsburgh ME, Hill Rice V, Matuk L. *Sense of coherence and life satisfaction: Patient and spousal adaptation to home dialysis*. Anna Journal 1998;**25**(2):219-228.
58. Jorgensen RS, Frankowski JJ, Carey MP. *Sense of coherence, negative life events and appraisal of physical health among university students*. Personality and Individual Differences 1999;**27**:1079-1089.
59. Kaiser CF, Sattler DN, Bellack DR, Dersin J. *A conservation fo resources approach to a natural disaster: Sense of coherence and psychological distress*. Journal of Social Behavior & Personality 1996;**11**(3):459-476.

60. Kark JD, Carmel S, Sinnreich R, Goldberger N, Friedlander Y. *Psychosocial factors among members of religious and secular kibbutzim*. Israel Journal of Medicine and Science 1996;**32**:185-194.
61. Karlsson I, Rasmussen C, Ravn J, Thiis J, Pettersson G, Larsson P. *Chest pain after coronary artery bypass: Relation to coping capacity and quality of life*. Scandinavian Cardiovascular Journal 2002;**36**(1):41-47.
62. Kuposov RA, Ruchkin VV, Eisemann M. *Sense of coherence. A mediator between violence exposure and psychopathology in Russian juvenile delinquents*. The Journal of Nervous and Mental Disease 2003;**191**(10):638-644.
63. Kravetz S, Drory Y, Florian V. *Hardiness and sense of coherence and their relation to negative affect*. European Journal of Personality 1993;**7**(4):233-244.
64. Langius A, Björvell H, Antonovsky A. *The sense of coherence concept and its relation to personality traits in Swedish samples*. Scandinavian Journal of Caring Science 1992;**6**(3):165-171.
65. Langius A, Björvell H. *Coping ability and functional status in a Swedish population sample*. Scandinavian Journal of Caring Science 1993;**7**:3-10.
66. Langius A, Björvell B, Lind M. *Functional status and coping in patients with oral and pharyngeal cancer before and after surgery*. Head & Neck 1994;**16**:559-568.
67. Langius A, Björvell H. *Salutogenic model and use of the Sense of coherence scale in nursing research - a methodological report*. Vård i Norden 1996;**16**(1):28-32.
68. Langius A, Björvell H. *The applicability of the Antonovskys sense of coherence scale to a group of Pentecostals*. Scandinavian Journal of Caring Science 2001;**15**:190-192.
69. Lewis SL, Beckett PJ, Bonner PN, Campbell MA, Cooper CL, Hunt WC. *Work stress, burnout, and sense of coherence among dialysis nurses*. Anna Journal 1992;**19**(6):545-554.
70. Lewis SL, Bonner PN, Campbell MA, Cooper CL, Willard A. *Personality, stress, coping, and sense of coherence among nephrology nurses in dialysis settings*. Anna Journal 1994;**21**(6):325-336.
71. Lewis JS. *Sense of coherence and the strengths perspective with older persons*. Journal of Gerontological Social Work 1996;**26**(3/4):99-112.
72. Lustig DC, Rosenthal DA, Strauser DR, Haynes K. *The relationship between sense of coherence and adjustment in persons with disabilities*. Rehabilitation Counseling Bulletin 2000;**43**(3):134-141.
73. Lustig DC, Strauser DR. *The relationship between sense of coherence and career thoughts*. The Career Development Quarterly 2002;**51**:2-11.
74. Malmgren-Olsson E-B, Bränholm I-B. *A comparison between three physiotherapy approaches with regard to health-related factors in patients with non-specific musculoskeletal disorders*. Disability and Rehabilitation 2002;**24**(6):308-317.
75. Magen Z, Birenbaum M, Ilovich T. *Adolescents from disadvantaged neighborhoods: Personal characteristics as related to volunteer involvement*. International Journal for the Advancement of Counseling 1992;**15**:47-59.
76. Margalit M, Raviv A, Ankonina DB. *Coping and coherence among parents with disabled children*. Journal of Clinical Child Psychology 1992;**21**(3):202-209.
77. Milanesi LC, Colby BN, Cesario TC, Mishra SI, Kennedy S, Yousefi S. *Sense of coherence, health, and immunoglobulin M among older Anglo-American and Japanese-American women. An exploratory study*. In: McCubbin HI, Thompson EA, Thompson AI, Fromer JE, editors. Stress, coping, and health in families. Sense of coherence and resiliency. Thousand Oaks California: Sage Publications; 1998.

78. Mockler D, Riordan J, Murphy M. *Psychosocial factors associated with the use/non-use of mental health services by primary carers of individuals with dementia*. International Journal of Geriatric Psychiatry 1998;**13**:310-314.
79. Motzer Adams S, Hertig V, Jarrett M, Heitkemper MM. *Sense of coherence and quality of life in women with and without irritable bowel syndrome*. Nursing Research 2003;**52**(5):329-337.
80. Nakamura H, Ogawa Y, Nagase H, Nakajima M, Kodama N, Ogino K, et al. *Natural killer cell activity and its related psychological factor, sense of coherence in male smokers*. Journal of Occupational Health 2001;**43**:191-198.
81. Nakamura H, Matsuzaki I, Sasahara S, Hatta K, Nagase H, Oshita Y, et al. *Enhancement of a sense of coherence and natural killer cell activity which occurred in subjects who improved their exercise habits through health education in the workplace*. Journal of Occupational Health 2003;**45**:278-285.
82. Nesbitt BJ, Heidrich SM. *Sense of coherence and illness appraisal in older women's quality of life*. Research in Nursing & Health 2000;**23**:25-34.
83. Newton SE. *Relationship of hardiness and sense of coherence to post-liver transplant return to work*. Holist Nurs Pract 1999;**13**(3):71-79.
84. Nilsson B. *Vad betyder känsla av sammanhanga i våra liv? Aspekter på stabilitet, kön, hälsa och psykosociala faktorer*. Umeå University medical dissertations New series no 806. [Doctoral thesis.]. Umeå: Umeå University, Family Medicine, Department of Public Health and Clinical Medicine.; 2002.
85. Nintachan P, Sompongse P. *The sense of coherence and trait-anxiety of nursing students at Ramathibodi School of Nursing: A four year follow up study during academic year 1994-1997*. Rama Nursing Journal 2000;**6**(2):119-132.
86. Nordström G, Lützén K. *Acceptance of ostomy surgery*. Scandinavian Journal of Caring Science 1995;**9**:11-15.
87. O'Carroll RE, Ayling R, O'Reilly SM, North NT. *Alexithymia and sense of coherence in patients with total spinal cord transection*. Psychosomatic Medicine 2003;**65**(1):151-155.
88. Ortlepp K, Friedman M. *Prevalence and correlates of secondary traumatic stress in workplace lay trauma counselors*. Journal of Traumatic Stress 2002;**15**(3):213-222.
89. Persson L, Larsson G, Ohlsson O, Hallberg IR. *Acute leukaemia or highly malignant lymphoma patients' quality of life over two years: a pilot study*. European Journal of Cancer Care 2001;**10**(1):36-48.
90. Petrie K, Brook R. *Sense of coherence, self-esteem, depression and hopelessness as correlates of reattempting suicide*. British Journal of Clinical Psychology 1992;**31**(293-300).
91. Polewka A, Chrostek-Maj J, Kroch S. *Psychosocial aspects of the suicidal attempts of Polish females*. Archives of Psychiatry and Psychotherapy 2001;**3**(2):51-60.
92. Poppius E, Tenkanen L, Kalimo R, Heinsalmi P. *The sense of coherence, occupation and the risk of coronary heart disease in the Helsinki Heart Study*. Social Science and Medicine 1999;**49**:109-120.
93. Poppius E, Tenkanen L, Hakama M, Kalimo R, Pitkänen T. *The sense of coherence, occupation and all-cause mortality in the Helsinki Heart Study*. European Journal of Epidemiology 2003;**18**:389-393.
94. Pålsson M-B, Hallberg IR, Norberg A, Björvell H. *Burnout, empathy and sense of coherence among Swedish district nurses before and after systematic clinical supervision*. Scandinavian Journal of Caring Science 1996;**10**:19-26.
95. Ray EC, Nickels MW, Sayeed S, Sax HC. *Predicting success after gastric bypass: The role of psychosocial and behavioral factors*. Surgery 2003;**134**:555-564.

96. Ramfelt E, Langius A, Björvell H, Nordström G. *Treatment decision-making and its relation to the sense of coherence and the meaning of the disease in a group of patients with colorectal cancer*. European Journal of Cancer Care 2000;**9**:158-165.
97. Rena F, Moshe S, Abraham O. *Couples' adjustment to one partner's disability: The relationship between sense of coherence and adjustment*. Social Science and Medicine 1996;**43**(2):163-171.
98. Rena F. *The relationship between the sense of coherence and adjustment to disability studied in the context of marital interrelations*. Marriage & Family Review 1998;**27**(1/2):71-90.
99. Rennemark M. *Wellbeing in old age. Life history evaluations, sense of coherence and social networks in relation to health*. [Doctoral thesis.]. Lund: Lund university, Department of Psychology; 1999.
100. Richardson A, Adner N, Nordström G. *Persons with insulin-dependent diabetes mellitus: acceptance and coping ability*. Journal of Advanced Nursing 2001;**33**(6):758-763.
101. Runeson R, Norbäck D, H.Stattin. *Symptoms and sense of coherence - a follow-up study of personnel from workplace buildings with indoor air problems*. International Archives of Occupational Environmental Health 2003;**76**:29-38.
102. Sagy S, Antonovsky A. *The family sense of coherence and the retirement transition*. Journal of Marriage & Family 1992;**54**(4):983-994.
103. Sagy S, Antonovsky H. *The development of the sense of coherence: A retrospective study of early life experiences in the family*. Journal of Aging and Human Development 2000;**51**(2):155-166.
104. Salmela-Aro K. *Struggling with self: The personal projects of students seeking psychological counselling*. Scandinavian Journal of Psychology 1992;**33**:330-338.
105. Sammallahti PR, Holi MJ, Komulainen EJ, Aalberg VA. *Comparing two self-report measures of coping - the sense of coherence scale and the defense style questionnaire*. Journal of Clinical Psychology 1996;**52**(5):517-524.
106. Sandell R, Blomberg J, Lazar A. *The factor structure of Antonovsky's sense of coherence scale in Swedish clinical and nonclinical samples*. Personality and Individual Differences 1998;**24**(5):701-711.
107. Sandell R, Blomberg J, Lazar A. *Time matters: On temporal interactions in long-term follow-up of long-term psychotherapies*. Psychotherapy Research 2002;**12**(1):39-58.
108. Schnyder U, Moergeli H, Glaghofer R, Buddeberg C. *Incidence and prediction of posttraumatic stress disorder symptoms in severely injured accident victims*. American Journal of Psychiatry 2001;**158**:594-599.
109. Schnyder U, Büchi S, Mörgeli H, Sensky T. *Sense of coherence - a mediator between disability and handicap?* Psychotherapy and Psychosomatics 1999;**68**:102-110.
110. Schnyder U, Büchi S, Sensky T, Klaghofer R. *Antonovsky's sense of coherence: Trait or state?* Psychotherapy and Psychosomatics 2000;**69**:296-302.
111. Selm Mv, Dittmann-Kohli F. *Meaninglessness in the second half of life: The development of a construct*. International Journal of Aging and Human Development 1998;**47**(2):81-104.
112. Shiu AT-Y. *The significance of sense of coherence for the perceptions of task characteristics and stress during interruptions amongst a sample of public health nurses in Hong Kong: Implications for nursing management*. Public Health Nursing 1998;**15**(4):273-280.
113. Skirka N. *The relationship of hardiness, sense of coherence, sports participation, and gender to perceived stress and psychological symptoms among college students*. The Journal of Sports Medicine and Physical Fitness 2000;**40**:63-70.



114. Smith TL, Meyers LS. *The sense of coherence: Its relationship to personality, stress, and health measures*. Journal of Social Behavior & Personality 1997;**12**(2):513-527.
115. Strauser DR, Lustig DC. *The moderating effect of sense of coherence on work adjustment*. Journal of Employment Counseling 2003;**40**:129-139.
116. Strümpfer DJW, Danana N, et al. *Personality dispositions and job satisfaction*. South African Journal of Psychology 1998;**28**(2):92-101.
117. Svartvik L, Lidfeldt J, Nerbrand C, Samsioe G, Scherstén B, Nilsson PM. *Dyslipidaemia and impaired well-being in middle-aged women reporting low sense of coherence*. Scandinavian Journal of Primary Health Care 2000;**18**:177-182.
118. Svartvik L, Lidfeldt J, Nerbrand C, Samsjö G, Scherstén B, Nilsson PM. *Hög känsla av sammanhang kan ha hälsofrämjande effekter*. Läkartidningen 2002;**99**(11):1195-1200.
119. Svavarsdóttir EK, McCubbin MA, Kane JH. *Well-being of parents of young children with asthma*. Research in Nursing & Health 2000;**23**:346-358.
120. Svavarsdóttir EK, Rayens MK. *American and Icelandic parents' perceptions of the health status of their young children with chronic asthma*. Journal of Nursing Scholarship 2003;**35**(4):351-358.
121. Söderberg S, Evengård B. *Short-term group therapy for patients with Chronic Fatigue Syndrome*. Psychotherapy and Psychosomatics 2001;**70**:108-111.
122. Tedgård U, Ljung R, McNeil TF. *How do carriers of hemophilia and their spouses experience prenatal diagnosis by chorionic villus sampling?* Clin Genet 1999;**55**:26-33.
123. Tedgård U, Ljung R, McNeil TF. *Long-term psychological effects of carrier testing and prenatal diagnosis of haemophilia: Comparison with a control group*. Prenatal Diagnosis 1999;**19**:411-417.
124. Thorell-Ekstrand I, Björvell H. *Preparedness for clinical nursing education*. Scandinavian Journal of Caring Science 1993;**8**:17-24.
125. Uren TH, Wastell CA. *Attachment and meaning-making in perinatal bereavement*. Death Studies 2002;**26**(4):279-308.
126. Wissing MP, van Eeden C. *Empirical clarification of the nature of psychological well-being*. South African Journal of Psychology 2002;**32**(1):32-44.
127. Zhang J, Vitaliano PP, Lutgendorf SK, Scanlan JM, Savage MV. *Sense of coherence buffers relationships of chronic stress with fasting glucose levels*. Journal of Behavioral Medicine 2001;**24**(1):33-55.
128. Ying Y-W. *Strengthening intergenerational/intercultural ties in migrant families: A new intervention for parents*. Journal of Community Psychology 1999;**27**(1):89-96.
129. Ying Y-W, Lee PA, Tsai JL. *Cultural orientation and racial discrimination: Predictors of coherence in Chinese American young adults*. Journal of Community Psychology 2000;**28**(4):427-442.
130. Ying Y-W, Lee PA, Tsai JL, Lee YJ, Tsang M. *Network composition, social integration, and sense of coherence in Chinese American young adults*. Journal of Human Behavior in the Social Environment 2001;**3**(3/4):83-98.
131. Ying YW, Lee PA, Tsai JL, Hung Y, Lin M, Wan CT. *Asian American college students as model minorities: An examination of their overall competence*. Cultural Diversity and Ethnic Minority Psychology 2001;**7**(1):59-74.
132. Abel T, Walter E, Niemann S, Weitkunat R. *The Berne-Munich Lifestyle Panel*. Sozial- und Präventivmedizin 1999;**44**:91-106.
133. Abrahamsson A, Ejlertsson G. *A salutogenic perspective could be of practical relevance for the prevention of smoking amongst pregnant women*. Midwifery 2002;**18**(4):323-331.

134. Adams T, Bezner J, Steinhardt M. *Conceptualization and measurement of the spiritual and psychological dimensions of wellness in a college population*. Journal of American College Health 2000;**48**(4):165-173.
135. Allison KR, Adlaf EM, Ialomiteanu A, Rehm J. *Predictors of health risk behaviours among young adults: analysis of the National Population Health Survey*. Canadian Journal of Public Health 1999;**90**(2):85-89.
136. Anderzén I, Arnetz BB. *Psychophysiological reactions during the first year of a foreign assignment: results of a controlled longitudinal study*. Work & Stress 1997;**11**(4):304-318.
137. Anderzén I, Arnetz BB. *Psychophysiological reactions to international adjustment*. Psychotherapy and Psychosomatics 1999;**68**:67-75.
138. Anke AGW, Fugl-Meyer AR. *Life satisfaction several years after severe multiple trauma - a retrospective investigation*. Clinical Rehabilitation 2003;**17**(4):431-442.
139. Anson O, Rosenzweig A, P.Shwarzmann. *The health of women married to men in regular army service: Women who cannot afford to be ill*. Women & Health 1993;**20**(1):33-45.
140. Anson O, Paran E, Neumann L, Chernichovsky D. *Gender differences in health perceptions and their predictors*. Social Science and Medicine 1993;**36**(4):419-427.
141. Anson O, Carmel S, Levenson A, Bonne DY, et al. *Coping with recent life events: The interplay of personal and collective resources*. Behavioral Medicine 1993;**18**(4):159-166.
142. Baker M, North D, Smith DF. *Burnout, sense of coherence and sources of salutogenesis in social workers*. Psychology, A Journal of Human Behavior 1997;**34**(1):22-26.
143. Berg JE, Brevik JI. *Complaints that predict drop-out from a detoxification and counselling unit*. Addictive Behaviors 1998;**23**(1):35-40.
144. Brooks J. *Salutogenesis, successful aging, and the advancement of theory on family caregiving*. In: McCubbin HI, Thompson EA, Thompson AI, Fromer JE ed. In: Stress, coping, and health in families. Sense of coherence and resiliency. Thousand Oaks: Sage Publications; 1998. p. 227-248.
145. Buddeberg-Fischer B, Klaghofer R, Schnyder U. *Sense of coherence in adolescents*. Sozial- und Präventivmedizin 2001;**46**(6):404-410.
146. Büchi S, Villiger P, Kauer Y, Klaghofer R, Sensky T, Stoll T. *PRISM (Pictorial Representation of Illness and Self Measure) - a novel visual method to assess the global burden of illness in patients with systemic lupus erythematosus*. Lupus 2000;**9**:368-373.
147. Cai D, Giles H, Noels K. *Elderly perceptions of communication with older and younger adults in China: Implications for mental health*. Journal of Applied Communication Research 1998;**26**:32-51.
148. Chumbler NR, Grimm JW, Cody M, Beck C. *Gender, kinship and caregiver burden: the case of community-dwelling memory impaired seniors*. International Journal of Geriatric Psychiatry 2003;**18**:722-732.
149. Cochrane WM, Slade P. *Appraisal and coping in adults with cleft lip: Associations with well-being and social anxiety*. British Journal of Medical Psychology 1999;**72**:485-503.
150. Coe RM, Romeis JC, Hall MM. *Sense of coherence and survival in the chronically ill elderly. A five-year follow-up*. In: McCubbin HI, Thompson EA, Thompson AI, E.Fromer J, editors. Stress, coping, and health in families. Sense of coherence and resiliency. Thousand Oaks California: Sage Publications; 1998.

151. Coward D. *Self-transcendence and correlates in a healthy population*. Nursing Research 1996;**45**(2):116-121.
152. Due EP, Holstein BE. "Sense of coherence", socialgruppe og helbred i en dansk befolkningsundersøgelse. Ugeskrift for Laeger 1998;**160**(51):7424-7429.
153. Edwards D, Besseling E. *Relationship between depression, anxiety, sense of coherence, social support and religious...* South African Journal of Psychology 2001;**31**(4):p 62-72.
154. Eklund M, Hansson L, Bejerholm U. *Relationships between satisfaction with occupational factors and health-related variables in schizophrenia outpatients*. Social Psychiatry and Psychiatric Epidemiology 2001;**36**:79-85.
155. Ekman I, Fagerberg B, Lundman B. *Health-related quality of life and sense of coherence among elderly patients with severe chronic heart failure in comparison with healthy controls*. Heart & Lung: The Journal of Acute & Critical Care 2002;**31**(2):94-101.
156. Elovainio M, Kivimäki M. *Sense of coherence and social support - Resources for subjective well-being and health of the aged in Finland*. International Journal of Social Welfare 2000;**9**:128-135.
157. Feldt T. *Sense of coherence. Structure, stability and health promoting role in working life. Jyväskylä studies in education, psychology and social research*. [Doctoral thesis.]. Jyväskylä: University of Jyväskylä; 2000.
158. Feldt T, Leskinen E, Kinnunen U, Ruoppila I. *The stability of sense of coherence: comparing two age groups in a 5-year follow-up study*. Personality and Individual Differences 2003;**35**:1151-1165.
159. Forbes DA. *Enhancing mastery and sense of coherence: Important determinants of health in older adults*. Geriatric Nursing 2001;**22**(1):29-32.
160. Forsberg C, Björvell H, Cedermark B. *Well-being and its relation to coping ability in patients with colo-rectal and gastric cancer before and after surgery*. Scandinavian Journal of Caring Science 1996;**10**:35-44.
161. Freire MCM, Sheiham A, Hardy R. *Adolescents' sense of coherence, oral health status, and oral health-related behaviours*. Community Dentistry and Oral Epidemiology 2001;**29**:204-212.
162. Freire MdCM, Hardy R, Sheiham A. *Mothers' sense of coherence and their adolescent children's oral health status and behaviours*. Community Dental Health 2002;**19**:24-31.
163. Germano D, Misajon R, Cummins RA. *Quality of life and sense of coherence in people with arthritis*. Journal of Clinical Psychology in Medical Settings 2001;**8**(4):253-261.
164. George VD. *Field-workers' sense of coherence and perception of risk when making home visits*. Public Health Nursing 1996;**13**(4):244-252.
165. Giotakos O. *Suicidal ideation, substance use, and sense of coherence in Greek male conscripts*. Military Medicine 2003;**168**(6):447-450.
166. Gottlieb A. *Single mothers of children with disabilities. The role of sense of coherence in managing multiple challenges*. In: McCubbin HI TE, Thompson AI, Fromer JE, ed., editor. Stress, coping, and health in families. Sense of coherence and resiliency. Thousand Oaks, California: Sage Publications; 1998. p. 189-204.
167. Graham K. *Alcohol abstention among older adults: Reasons for abstaining and characteristics of abstainers*. Addiction Research 1998;**6**(6):473-487.
168. Guldvog B. *Can patient satisfaction improve health among patients with angina pectoris?* International Journal for Quality in Health Care 1999;**11**(3):233-240.
169. Harri M. *The sense of coherence among nurse educators in Finland*. Nurse Education Today 1998;**18**:202-212.

170. Hassmén P, Koivula N, Uutela A. *Physical exercise and psychological well-being: A population study in Finland*. Preventive Medicine 2000;**30**:17-25.
171. Hedov G, Annerén G, Wikblad K. *Swedish parents of children with Down's syndrome*. Scandinavian Journal of Caring Science 2002;**16**:424-430.
172. Hensing G, Alexanderson K. *The relation of adult experience of domestic harassment, violence, and sexual abuse to health and sickness absence*. International Journal of Behavioral Medicine 2000;**7**(1):18 p.
173. Hessén Söderman A-C, Bergenius J, Bagger-Sjöbäck D, Tjell C, Langius A. *Patients' subjective evaluations of quality of life related to disease-specific symptoms, sense of coherence, and treatment in Ménière's disease*. Otology & Neurotology 2001;**22**:526-533.
174. Hessén Söderman A-C, Bagger-Sjöbäck D, Bergenius J, Langius A. *Factors influencing quality of life in patients with Ménière's disease, identified by a multidimensional approach*. Otology & Neurotology 2002;**23**:941-948.
175. Hood Sc, Beaudet MP, Catlin G. *A healthy outlook*. Health Reports 1996;**7**(4):25-32.
176. Ingram KM, Corning AF, Schmidh LD. *The relationship of victimization experiences to psychological well-being among homeless women and low-income housed women*. Journal of Conseling Psychology 1996;**43**(2):218-227.
177. Jakobsson L. *Indwelling catheter treatment and health-related quality of life in men with prostate cancer in comparison with men with benign prostatic hyperplasia*. Scandinavian Journal of Caring Science 2002;**16**:264-271.
178. Johansson JH, Engström T. *Sense of coherence and ill health among the unemployed and re-employed after closure of an assembly plant*. Work & Stress 1999;**13**(3):204-222.
179. Jonsson A, Segersten K, Mattsson B. *Post-traumatic stress among Swedish ambulance personnel*. Emergency Medicine Journal 2003;**20**:79-84.
180. Juvonen-Posti P, Kallanranta T, Eksymä S-L, Piirainen K, Keinänen-Kiukaanniemi S. *Into work, through tailored paths: a two-year follow-up of the return-to-work rehabilitation and re-employment project*. International Journal of Rehabilitation Research 2002;**25**:313-330.
181. Kalimo R, Pahkin K, Mutanen P. *Work and personal resources as long-term predictors of well-being*. Stress and Health 2002;**18**:227-234.
182. Kalimo R, Pahkin K, Mutanen P, Toppinen-Tanner S. *Staying well or burning out at work: work characteristics and personal resources as long-term predictors*. Work & Stress 2003;**17**(2):109-122.
183. Kamwendo K, Hansson M, Hjerpe I. *Relationships between adherence, sense of coherence, and knowledge in cardiac rehabilitation*. Rehabil Nurs 1998;**23**(5):240-5, 251.
184. Karlsson I, Berglin E, Larsson PA. *Sense of coherence: quality of life before and after coronary artery bypass surgery - a longitudinal study*. Journal of Advanced Nursing 2000;**31**(6):1383-1392.
185. Kivimäki M, Kalimo R, Toppinen S. *Sense of coherence as a modifier of occupational stress exposure, stress perception, and experienced strain: A study of industrial managers*. Psychological Reports 1998;**83**:971-981.
186. Kivimäki M, Vahtera J, Elovainio M, Lillrank B, Kevin MV. *Death or illness of a family member, violence, interpersonal conflict, and financial difficulties as predictors of sickness absence: Longitudinal cohort study on psychological and behavioral links*. Psychosomatic Medicine 2002;**64**:817-825.
187. Kjaer Fuglsang A, Moergeli H, Hepp-Beg S. *Who develops acute stress disorder after accidental injuries?* Psychotherapy and Psychosomatics 2002;**71**:214-222.

188. Klang B, Björvell H, Cronqvist A. *Patients with chronic renal failure and their ability to cope*. Scandinavian Journal of Caring Science 1996;**10**:89-95.
189. Klang B, Björvell H, Clyne N. *Quality of life in predialytic uremic patients*. Quality of Life Research 1996;**5**:109-116.
190. Klang B, Björvell H, Clyne N. *Predialysis education helps patients choose dialysis modality and increases disease-specific knowledge*. Journal of Advanced Nursing 1999;**29**(4):869-876.
191. Klevens J, Restrepo O, Roca J, Martinez A. *Comparison of offenders with early- and late-starting antisocial behavior in Colombia*. International Journal of Offender Therapy and Comparative Criminology 2000;**44**(2):194-203.
192. Klevsgård R, Hallberg IR, Risberg B, Thomsen MB. *Quality of life associated with varying degrees of chronic lower limb ischaemia; Comparison with a healthy sample*. Eur J Vasc Endovasc Surg 1999;**17**:319-325.
193. Krantz G, Östergren P-O. *The association between violence victimisation and common symptoms in Swedish women*. Journal of Epidemiological Community Health 2000;**54**:815-821.
194. Kristenson M, Kucinskienė Z, Bergdahl B, Calkauskas H, Urmonas V, Orth-Gomér K. *Increased psychosocial strain in Lithuanian versus Swedish men: The LiVicordia study*. Psychosomatic Medicine 1998;**60**:277-282.
195. Lajunen T, Corry A, Summala H, Hartley L. *Cross-cultural differences in drivers' self-assessments of their perceptual-motor and safety skills: Australians and Finns*. Personality and Individual Differences 1998;**24**(4):539-550.
196. Larsson G, Kallenberg K. *Sense of coherence, socioeconomic conditions and health. Interrelationships in a nation-wide Swedish sample*. European Journal of Public Health 1996;**6**:175-180.
197. Larsson G, Kallenberg K. *Dimensional analysis of sense of coherence using structural equation modelling*. European Journal of Personality 1999;**13**:51-61.
198. Larsson G, Michel P-O, Lundin T. *Systematic assessment of mental health following various types of posttrauma support*. Military Psychology 2000;**12**(2):121-135.
199. Larsson BW, Larsson G. *Patients' views on quality of care: do they merely reflect their sense of coherence?* Journal of Advanced Nursing 1999;**30**(1):33-39.
200. Lee JW, Jones PS, Mineayama Y, Zhang XE. *Cultural differences in responses to a Likert scale*. Research in Nursing & Health 2002;**25**:295-306.
201. Levert T, Lucas M, Ortlepp K. *Burnout in psychiatric nurses: Contributions of the work environment and a sense of coherence*. South African Journal of Psychology 2000;**30**(2):36-43.
202. Lutgendorf SK, Vitaliano PP, Tripp-Reimer T, Harvey JH, M.Lubaroff D. *Sense of coherence moderates the relationship between life stress and natural killer cell activity in healthy older adults*. Psychology and Aging 1999;**14**(4):552-563.
203. Mackie KS, Holahan CK, Gottlieb NH. *Employee involvement management practices, work stress, and depression in employees of a human services residential care facility*. Human Relations 2001;**54**(8):1065-1092.
204. Markström A, Sundell K, Lysdahl M, Andersson G, Schedin U, Klang B. *Quality-of-life evaluation of patients with neuromuscular and skeletal diseases treated with noninvasive and invasive home mechanical ventilation*. Chest 2002;**122**(5):1695-1700.
205. Matsuura E, Ohta A, Kanegae F, Haruda Y, Ushiyama O, Koarada S, et al. *Frequency and analysis of factors closely associated with the development of depressive symptoms in patients with Scleroderma*. The Journal of Rheumatology 2003;**30**:1782-1787.

206. Mehlum L. *Suicidal ideation and sense of coherence in male conscripts*. Acta Psychiatrica Scandinavica 1998;**98**:487-492.
207. Melin R, Fugl-Meyer AR. *On prediction of vocational rehabilitation outcome at a Swedish employability institute*. J Rehabil Med 2003;**35**:284-289.
208. Mendel B, Bergenius J, Langius A. *The sense of coherence: a tool for evaluating patients with peripheral vestibular disorders*. Clinical Otolaryngology and Allied Sciences. 2001;**26**:19-24.
209. Motzer SU, Stewart J. *Sense of coherence as a predictor of quality of life in persons with coronary heart disease surviving cardiac arrest*. Research in Nursing & Health 1996;**19**:287-298.
210. Nasermoaddeli A, Sekine M, Hamanishi S, Kagamimori S. *Job strain and sleep quality in Japanese civil servants with special reference to sense of coherence*. Journal of Occupational Health 2002;**44**:337-342.
211. Nasermoaddeli A, Sekine M, Hamanishi S, Kagamimori S. *Associations of sense of coherence with sickness absence and reported symptoms of illness in Japanese civil servants*. Journal of Occupational Health 2003;**45**:231-233.
212. Nilsson B, Holmgren L, Stegmayr B, Westman G. *Sense of coherence - stability over time and relation to health, disease, and psychosocial changes in a general population: A longitudinal study*. Scandinavian Journal of Public Health 2003;**31**:297-304.
213. Olsson MB, Hwang CP. *Sense of coherence in parents of children with different developmental disabilities*. Journal of Intellectual Disability Research 2002;**46**(7):548-559.
214. Pallant JF, Lae L. *Sense of coherence, well-being, coping and personality factors: further evaluation of the sense of coherence scale*. Personality and Individual Differences 2002;**33**:39-48.
215. Persson L, Hallberg IR, Ohlsson O. *Survivors of acute leukaemia and highly malignant lymphoma - retrospective views of daily life problems during treatment and when in remission*. Journal of Advanced Nursing 1997;**25**:68-78.
216. Post-White J. *The role of sense of coherence in mediating the effects of mental imagery on immune function, cancer outcome, and quality of life*. In: McCubbin HI, Thompson EA, Thompson AI, Fromer JE, editors. Stress, coping, and health in families. Sense of coherence and resiliency. Thousand Oaks California: Sage Publications; 1998.
217. Ryland EK, Tegarden LF, King JC. *The salutogenic effect of an MBA program. Sense of coherence and the academic experience of U.S. and foreign MBA students*. In: In: McCubbin HI TE, Thompson AI, et al, editor. Stress, coping, and health in families. Sense of coherence and resiliency. Thousand Oaks: Sage Publications; 1998. p. 125-144.
218. Rätty LK, Wilde Larsson B, Söderfeldt B. *Health-related quality of life in youth: A comparison between adolescents and young adults with uncomplicated epilepsy and healthy controls*. Journal of Adolescent Health 2003;**33**:252-258.
219. Sagy S. *Effects of personal, family, and community characteristics on emotional reactions in a stress situation*. Youth & Society 1998;**29**(3):311-330.
220. Sagy S. *Moderating factors explaining stress reactions: Comparing chronic-without-acute-stress and chronic-with-acute-stress situations*. The Journal of Psychology 2002;**136**(4):407-419.
221. Sandén-Eriksson B. *Coping with type-2 diabetes: the role of sense of coherence compared with active management*. Journal of Advanced Nursing 2000;**31**(6):1393-1397.

222. Santavirta N, Björvell H, Konttinen YT, Solovieva S, Poussa M, Santavirta S. *Sense of coherence and outcome of low-back surgery: 5-year follow-up of 80 patients.* European Spine Journal 1996;**5**:229-235.
223. Santavirta N, Björvell B, Konttinen YT, Solovieva S, Poussa M, Santavirta S. *Sense of coherence and outcome of anterior low-back fusion. A 5- to 13-year follow-up of 85 patients.* Arch Orthop Trauma Surg 1996;**115**:280-285.
224. Sarid O, Anson O, Yaari A, Margalith M. *Are coping resources related to humoral reaction induced by academic stress? An analysis of specific salivary antibodies to Epstein-Barr virus and cytomegalovirus.* Psychology, Health & Medicine 2003;**8**(1):105-117.
225. Sarvimäki A, Ojala S. *De äldres livsbetingelser 2: känslan av sammanhang.* Gerontologia 1994;**8**(3):140-149.
226. Schult M-L, Söderback I, Jacobs K. *The sense-of-coherence and the capability of performing daily occupations in persons with chronic pain.* Work & Stress 2000;**15**:189-201.
227. Smith SD. *The retirement transition and the later life family unit.* Public Health Nursing 1997;**14**(4):207-216.
228. Smith PM, Breslin CF, Beaton DE. *Questioning the stability of sense of coherence. The impact of socio-economic status and working conditions in the Canadian population.* Social Psychiatry and Psychiatric Epidemiology 2003;**38**:475-484.
229. Snekkevik H, Anke AG, Stanghelle JK, Fugl-Meyer AR. *Is sense of coherence stable after multiple trauma?* Clinical Rehabilitation 2003;**17**:443-453.
230. Soskolne V. *Single parenthood, occupational drift and psychological distress among immigrant women from the former Soviet Union in Israel.* Women & Health 2001;**33**(3/4):67-84.
231. Sperber AD, Carmel S, Atzmon Y, Weisberg I, Shalit Y, Neumann L, et al. *The Sense of Coherence Index and the Irritable Bowel Syndrome. A cross-sectional comparison among irritable bowel syndrome patients with and without coexisting fibromyalgia, Irritable Bowel Syndrome non-patients, and controls.* Scandinavian Journal of Gastroenterology 1999;**34**:259-263.
232. Starrin B, Jönsson LR, Rantakeisu U. *Sense of coherence during unemployment.* International Journal of Social Welfare 2001;**10**:107-116.
233. Steiner A, Raube K, Stuck AE, Aronow HU, Draper D, Rubenstein LZ, et al. *Measuring psychosocial aspects of well-being in older community residents: Performace of four short scales.* The Gerontologist 1996;**36**(1):54-62.
234. Stephens T, Dulberg C, Joubert N. *Mental health of the canadian population: A comprehensive analysis.* Chronic Diseases in Canada 1999;**20**(3):12 pp.
235. Strümpfer DJW. *Psychometric properties of an instrument to measure resilience in adults.* South African Journal of Psychology 2001;**31**(1):36-45.
236. Suominen S, Ahvenainen J, Mattila K, Rautava P, Koskenvuo M. *Koherenssin tunne ja perusterveydenhuollon lääkäripalvelujen käyttö. Sense of coherence (SOC) and visits to doctors in the publicly and privately funded primary health care.* Sosiaalilääketieteellinen aikakauslehti. Journal of Social Medicine 2002;**39**(4):296-303.
237. Svebak S, Söndena K, Hausken T, Söreide O, Hammar Å, Berstad A. *The significance of personality in pain from gallbladder stones.* Scandinavian Journal of Gastroenterology 2000;**35**:759-764.
238. Söderfeldt M, Söderfeldt B, Ohlson C-G, Theorell T, Jones J. *The impact of sense of coherence and high-demand/low-control job environment on self-reported health, burnout and psychophysiological stress indicators.* Work & Stress 2000;**14**(1):1-15.

239. Takkinen S, Ruoppila I. *Meaning in life in three samples of elderly persons with high cognitive functioning*. International Journal of Aging and Human Development 2001;**53**(1):51-73.
240. Tang ST, Dixon J. *Instrument translation and evaluation of equivalence and psychometric properties: The Chinese sense of coherence scale*. 2002 2002;**10**(1):59-76.
241. Toppinen-Tanner S, Kalimo R. *Psychological symptoms and competence at three organizational levels of industrial design: The main and moderating role of sense of coherence*. Psychological Reports 2003;**92**:667-682.
242. Torsheim T, Aaroe Le, Wold B. *Sense of coherence and school-related stress as predictors of subjective health complaints in early adolescence: interactive, indirect or direct relationships?* Social Science and Medicine 2001;**53**:603-614.
243. Tselebis A, Moulou A, Ilias I. *Burnout versus depression and sense of coherence: Study of Greek nursing staff*. Nursing and Health Sciences 2001;**3**:69-71.
244. Veenstra M, Hofoss D. *Patient experiences with information in a hospital setting - A multilevel approach*. Medical Care 2003;**41**(4):490-499.
245. Wells YD, Kendig HL. *Health and well-being of spouse caregivers and the widowed*. The Gerontologist 1997;**37**(5):666-674.
246. Wells YD, Kendig HL. *Psychological resources and successful retirement*. Australian Psychologist 1999;**34**(2):111-115.
247. Wettergren L, Langius A, Björkholm M, Björvell H. *Physical and psychosocial functioning in patients undergoing autologous bone marrow transplantation - a prospective study*. Bone Marrow Transplantation 1997;**20**:497-502.
248. Virtanen P, Koivisto A-M. *Wellbeing of professionals at entry into the labour market: a follow up survey of medicine and architecture students*. Journal of Epidemiology and Community Health 2001;**55**:831-835.
249. Wolff AC, Ratner PA. *Stress, social support, and sense of coherence*. Western Journal of Nursing Research 1999;**21**(2):182-198.
250. Yam BMC, Shiu ATY. *Perceived stress and sense of coherence among critical care nurses in Hong Kong: a pilot study*. Journal of Clinical Nursing 2003;**12**:144-146.
251. Albertsen K, Nielsen ML, V.Borg. *The Danish psychosocial work environment and symptoms of stress: the main, mediating and moderating role of sense of coherence*. Work & Stress 2001;**15**(3):241-253.
252. Agardh EE, Ahlbom A, Andersson T, Efendic S, Grill V, Hallqvist J, et al. *Work stress and low sense of coherence is associated with type 2 diabetes in middle-aged Swedish women*. Diabetes Care 2003;**26**(3):719-724.
253. Andersen S, Berg JE. *The use of a sense of coherence test to predict drop-out and mortality after residential treatment of substance abuse*. Addiction Research & Theory 2001;**9**(3):239-251.
254. Anttila T, Poikolainen K, Uutela A, Lönnqvist J. *Structure and determinants of worrying among adolescent girls*. Journal of Youth Studies 2000;**3**(4):49-60.
255. Avlund K, Vass M, Hendriksen C. *Onset of mobility disability among community-dwelling old men and women. The role of tiredness in daily activities*. Age and Ageing 2003;**32**(6):579-584.
256. Bayard-Burfield L, Sundquist J, Johansson S-E. *Ethnicity, self reported psychiatric illness, and intake of psychotropic drugs in five ethnic groups in Sweden*. Journal of Epidemiology and Community Health 2001;**55**:657-664.
257. Berg JE, Andersen S, Brevik JI, Alveberg PÖ. *Drug addiction as a lifestyle*. Scandinavian Journal of Social Welfare 1996;**5**:30-34.



258. Berg JE. *Use of a sense of coherence test and Hopkins Symptom Checklist to predict completion on stay in a postdetoxification counseling unit.* The American Journal on Addictions 1996;**5**:327-333.
259. Berg JE, Andersen SBA. *Mortality 5 years after detoxification and counseling as indicated by psychometric tests.* Substance Abuse 2001;**22**(1):1-10.
260. Berg JE, Andersen S. *Sense of coherence evaluated by treatment counsellors and substance abusers as an indication of length of stay.* European Addiction Research 1997;**3**:99-102.
261. Berntsson L. *Health and well-being of children in the five Nordic countries in 1984 and 1996.* [Doctoral thesis.]. Göteborg: The Nordic School of Public Health.; 2000.
262. Bowen GL, Richman JM, Brewster A, Bowen N. *Sense of school coherence, perceptions of danger at school, and teacher support among youth at risk of school failure.* Child & Adolescent Social Work Journal 1998;**15**(4):273-286.
263. Cheung P, Spears G. *Psychiatric morbidity among New Zealand Cambodians: the role of psychosocial factors.* Social Psychiatry and Psychiatric Epidemiology 1995;**30**:92-97.
264. Eriksson N-G, Lundin T. *Early traumatic stress reactions among Swedish survivors of the m/s Estonia disaster.* British Journal of Psychiatry 1996;**169**:713-716.
265. Forsgårde M, Westman B, Nygren L. *Ethical discussion groups as an intervention to improve the climate in interprofessional work with the elderly and disabled.* Journal of Interprofessional Care 2000;**14**(4):351-361.
266. Grøholt E-K, Stigum H, Nordhagen R, Köhler L. *Is parental sense of coherence associated with child health?* European Journal of Public Health 2003;**13**:195-201.
267. Hall-Lord ML, Larsson G, Steen B. *Chronic pain and distress in older people: A cluster analysis.* International Journal of Nursing Practice 1999;**5**:78-85.
268. Hall-Lord ML, Steen B, Larsson G. *Postoperative experiences of pain and distress in elderly patients. An explorative study.* Aging Clinical and Experimental Research 1999;**11**:73-82.
269. Hellström C, Jansson B, Carlsson SG. *Subjective future as a mediating factor in the relation between pain, pain-related distress and depression.* European Journal of Pain 1999;**3**:221-233.
270. Hoehn-Anderson K. *The relationship between family sense of coherence and family quality of life after illness diagnosis. Collective and consensus views.* In: McCubbin HI TE, Thompson AI, Fromer JE, ed., editor. Stress, coping, and health in families. Sense of coherence and resiliency. Thousand Oaks California: Sage Publications; 1998. p. 169-187.
271. Ing JD, Reutter L. *Socioeconomic status, sense of coherence and health in Canadian women.* Canadian Journal of Public Health 2003;**94**(3):224-228.
272. Jahnsen R, Villien L, Stanghelle JK, Holm I. *Coping potential and disability - sense of coherence in adults with cerebral palsy.* Disability and Rehabilitation 2002;**24**(10):511-518.
273. Johansson I, Hamrin E, Larsson G. *Evaluation of the prognostic value of the health assessment form among patients clinically ready for discharge.* Journal of Nursing Management 1994;**2**:77-85.
274. Johnsen MHS, Soviknes I, Torsheim T. *Salutogenic coping resources and school-related stress: A prospective study of reciprocal effects. Mestringsressurser og opplevd skolerelatert stress: en prospektiv studie av gjensidige sammenhenger.* Tidsskrift for Norsk Psykologforening 2001;**38**(9):821-828.

275. Kivimäki M, Vahtera J, Thomson L, Griffiths A, Cox T. *Psychosocial factors predicting employee sickness absence during economic decline*. Journal of Applied Psychology 1997;**82**(6):858-872.
276. Kivimäki M, Feldt T, Vahtera J, Nurmi J-E. *Sense of coherence and health: evidence from two cross-lagged longitudinal samples*. Social Science and Medicine 2000;**50**:583-597.
277. Kivimäki M, Elovainio M, Vahtera J, Nurmi J-E, Feldt T, Keltikangas-Järvinen L, et al. *Sense of coherence as a mediator between hostility and health. Seven-year prospective study on female employees*. Journal of Psychosomatic Research 2002;**52**:239-247.
278. Kroll C, Blomberg H, Suominen S, Helenius H. *Sense of coherence and health in two cultures - a comparison between Finland and Japan*. Sosiaalilääketieteellinen aikakauslehti. Journal of Social Medicine 1998;**35**:142-151.
279. Kuuppelomäki M, Utriainen P. *A 3 year follow-up study of health care students' sense of coherence and related smoking, drinking and physical exercise factors*. International Journal of Nursing Studies 2003;**40**(4):383-388.
280. Larsson G, Johansson I, Hamrin E. *Sense of coherence among elderly somatic patients: predictive power regarding future needs of care*. Journal of Nursing Management 1995;**3**:307-311.
281. Larsson G, Kallenberg K, Setterlind S, Starrin B. *Health and loss of a family member: Impact of sense of coherence*. International Journal of Health Science 1994;**5**(1):5-11.
282. Loon AJMv, Tijhuis M, Surtees PG, Ormel J. *Personality and coping: their relationship with lifestyle risk factors for cancer*. Personality and Individual Differences 2001;**31**:541-553.
283. Lundberg O, Nyström Peck M. *Sense of coherence, social structure and health. Evidence from a population survey in Sweden*. European Journal of Public Health 1994;**4**:252-257.
284. Lundberg O, Nyström Peck M. *A simplified way of measuring sense of coherence. Experiences from a population survey in Sweden*. European Journal of Public Health 1995;**5**:56-59.
285. Margalit M, Tur-Kaspa H, Most T. *Reciprocal nominations, reciprocal rejections and loneliness among students with learning disorders*. Educational Psychology 1999;**19**(1):79-90.
286. Margalit M, Efrati M. *Loneliness, coherence and companionship among children with learning disorder*. Educational Psychology 1996;**16**(1):69-80.
287. Margalit M. *Loneliness and coherence among preschool children with learning disabilities*. Journal of Learning Disabilities 1998;**31**(2):173-180.
288. Midanik LT, Soghikian K, Ransom LJ, Polen MR. *Alcohol problems and sense of coherence among older adults*. Social Science and Medicine 1992;**34**(1):43-48.
289. Most t, Al-Yagon M, Tur-Kaspa H, Margalit M. *Phonological awareness, peer nominations, and social competence among preschool children at risk for developing learning disabilities*. International Journal of Disability, Development and Education 2000;**47**(1):89-105.
290. Nash JK. *Neighborhood effects on sense of school coherence and educational behavior in students at risk of school failure*. Children & Schools 2002;**24**(2):73-89.
291. Niemelä M. *Koherenssin tunne ja työmarkkina-asema*. Sosiaalilääketieteellinen Aikakauslehti 2002;**39**:184-191.
292. Nyamathi AM. *Relationship of resources to emotional distress, somatic complaints, and high-risk behaviors in drug recovery and homeless minority women*. Journal of Health Care for the Poor and Underserved 1992;**3**(1):93-106.

293. Nyamathi A. *Comparative study of factors relating to HIV risk level of black homeless women.* Journal of Acquired Immune Deficiency Syndromes 1992;**5**:222-228.
294. Nyamathi AM. *Sense of coherence in minority women at risk for HIV infection.* Public Health Nursing 1993;**10**(3):151-158.
295. Sagy S, Dotan N. *Coping resources of maltreated children in the family: a salutogenic approach.* Child Abuse & Neglect 2001;**25**:1463-1480.
296. Schumann A, Hapke U, Meyer C, Rumpf H-J, John U. *Measuring sense of coherence with only three items: A useful tool for population surveys.* British Journal of Health Psychology 2003;**8**:409-421.
297. Smits CHM, Deeg DJH, Bosscher RJ. *Well-being and control in older persons: the prediction of well-being from control measures.* International Journal of Aging and Human Development 1995;**40**(3):237-251.
298. Strümpfer DJW. *The origins of health and strength: From "salutogenesis" to "fortigenesis."* South African Journal of Psychology 1995;**25**(2):81-89.
299. Strümpfer DJW. *The relation between religious motivation and work-related variables amongs agricultural workers.* South African Journal of Psychology 1997;**27**(3):134-143.
300. Sundquist J, Bayard-Bufield L, Johansson LM, Johansson S-E. *Impact of ethnicity, violence and acculturation on displaced migrants. Psychological distress and psychosomatic complaints among refugees in Sweden.* The Journal of Nervous and Mental Disease 2000;**188**(6):357-365.
301. Suominen S. *Perceived health and life control. A theoretical review and empirical study about the connections between health and life control determined according to the strength of the sense of coherence.* [Doctoral thesis.]. Jyväskylä: STAKES - National Research and Development Centre for Welfare and Health, Research Reports 26.; 1993.
302. Suominen S, Blomberg H, Helenius H, Koskenvuo M. *Sense of coherence and health - does the association depend on resistance resources? A study of 3115 adults in Finland.* Psychology and Health 1999;**14**:937-948.
303. Suominen S, Helenius H, Blomberg H, Uutela A, Koskenvuo M. *Sense of coherence as a predictor of subjective state of health. Results of 4 years of follow-up of adults.* Journal of Psychosomatic Research 2001;**50**:77-86.
304. Surtees P, Wainwright N, Luben R, Khaw K-T, Day N. *Sense of coherence and mortality in men and women in the EPIC-Norfolk United Kingdom prospective cohort study.* American Journal of Epidemiology 2003;**158**(12):1202-1209.
305. Vahtera J, Pentti J, Uutela A. *The effect of objective job demands on registered sickness absence spells; do personal, social and job-related resources act as moderators?* Work & Stress 1996;**10**(4):286-308.
306. Vinson JA. *Children with asthma: Initial development of the child resilience model.* Pediatric Nursing 2002;**28**(2):149-158.
307. Vuori J. *Pre-employment antecedents of health resources, job factors and health risk behaviour in men and women.* Work & Stress 1994;**8**(3):263-277.
308. Gibson LM, Cook MJ. *Neuroticism and sense of coherence.* Psychological Reports 1996;**79**:343-349.
309. Cederblad M, Hansson K. *Sense of coherence - a concept influencing health and quality of life in a Swedish psychiatric at-risk group.* Israel Journal of Medical Sciences 1996;**32**(3-4):194-199.
310. Leddy SK. *Development and psychometric testing of the Leddy Healthiness Scale.* Research in Nursing & Health 1996;**19**:431-440.

311. Edman L, Larsen J, Hägglund H, Gardulf A. *Health-related quality of life, symptom distress and sense of coherence in adult survivors of allogeneic stem-cell transplantation*. *European Journal of Cancer Care* 2001;**10**:124-130.
312. Sammallahti P. *Evaluating defenses with the Defense Style Questionnaire: A review*. *Psychiatria Fennica* 1997;**28**:145-157.
313. Linn J, Poku K, Cain V, et al. *Psychosocial outcomes of HIV illness in male and female African American clients*. *Social Work in Health Care* 1995;**21**(3):43-60.
314. Ying Y-W, Akutsu PD, Zhang X, Huang LN. *Psychological dysfunction in southeast Asian refugees as mediated by sense of coherence*. *American Journal of Community Psychology* 1997;**25**(6):839-859.
315. Gana K. *Is sense of coherence a mediator between adversity and psychological well-being in adults?* *Stress and Health* 2001;**17**:77-83.
316. Mlonzi EN, Strümpfer DJW. *Antonovsky's sense of coherence scale and 16PF second-order factors*. *Social Behavior and Personality* 1998;**26**(1):39-50.
317. Flannery R, Perry C, Penk WE, Flannery GJ. *Validating Antonovsky's sense of coherence scale*. *Journal of Clinical Psychology* 1994;**50**(4):575-577.
318. Gilbar O. *Relationship between burnout and sense of coherence in health social workers*. *Social Work in Health Care* 1998;**26**(3):39-49.
319. Höfer R, Straus F. *Sense of coherence and health in disadvantaged adolescents*. *International Journal of Adolescent Medicine and Health* 1997;**9**(4):271-283.
320. Drory Y, Kravetz S, Florian V. *Psychosocial adjustment in patients after a first acute myocardial infarction: The contribution of salutogenic and pathogenic variables*. *Archives of Physical Medicine and Rehabilitation* 1999;**80**(7):811-818.
321. Lundman B, Norberg A. *The significance of a sense of coherence for subjective health in persons with insulin-dependent diabetes*. *Journal of Advanced Nursing* 1993;**18**:381-386.
322. Rennemark M, Hagberg B. *What makes old people perceive symptoms of illness? The impact of psychological and social factors*. *Aging & Mental Health* 1999;**3**(1):79-87.
323. Gibson LM, Parker V. *Inner resources as predictors of psychological well-being in middle-income African American breast cancer survivors*. *Cancer Control* 2003;**10**(5 Suppl):52-9.
324. Amir Khan JH, Greaves H. *Sense of coherence and stress: The mechanics of a healthy disposition*. *Psychology & Health* 2003;**18**(1):31-62.
325. Sivberg B. *Coping strategies and parental attitudes. A comparison of parents with children with autistic spectrum disorders and parents with non-autistic children*. *International Journal of Circumpolar Health* 2002;**61**(suppl 2):36-50.
326. Ruiselová Z. *Salutogenetic approach in the context of the big five factors*. *Studia Psychologica* 2000;**42**(3):157-161.
327. Ruiselová Z. *Relationship between resistance to load and personality traits in elderly women*. *Studia Psychologica* 2002;**44**(3):227-233.
328. Strümpfer DJW. *Sense of coherence, negative affectivity, and general health in farm supervisors*. *Psychological Reports* 1997;**80**:963-966.
329. Ruiselová Z. *Self-evaluation of coping in the context of personal intelligence*. *Studia Psychologica* 1995;**37**(3):149-153.
330. Senka J. *Coping processes in groups at risk in the context of psychological health aspects*. *Studia Psychologica* 1995;**37**(3):154-156.
331. Bishop GD. *The sense of coherence as a resource in dealing with stress*. *Psychologia: An International Journal of Psychology in the Orient* 1993;**36**(4):259-265.
332. Shahani C, Weiner R, Streit MK. *An investigation of the dispositional nature of the time management construct*. *Anxiety, Stress, and Coping* 1993;**6**:231-243.

333. Kleivsgård R, Hallberg IR, Risberg B, Thomsen MB. *The effects of successful intervention on quality of life in patients with varying degrees of lower-limb ischaemia.* European Journal of Vascular and Endovascular Surgery 2000;**19**:238-245.
334. Nasermoaddeli A, Sekine M, Hamanishi S, Kagamimori S. *Associations between sense of coherence and psychological work characteristics with changes in quality of life in Japanese civil servants: A 1-year follow-up study.* Industrial Health 2003;**41**:236-241.
335. Pasikowski T, Sek H, Scigala I. *"Sense of coherence" and subjective health concepts.* Polish Psychological Bulletin 1994;**25**(1):15-23.
336. Ekblad S, Wennström C. *Relationships between traumatic life events, symptoms and sense of coherence subscale meaningfulness in a group of refugee and immigrant patients referred to a psychiatric outpatient clinic in Stockholm.* Scandinavian Journal of Social Welfare 1997;**6**:279-285.
337. Gibson LM, Cook MJ. *Do health questionnaires which do not consider sex differences miss important information.* Psychological Reports 1997;**81**:163-171.
338. McSherry WC, Holm JE. *Sense of coherence: Its effects on psychological and physiological processes prior to, during, and after a stressful situation.* Journal of Clinical Psychology 1994;**50**(4):476-487.
339. Feldt T. *Sense of coherence. Structure, stability and health promoting role in working life.* Jyväskylä studies in education, psychology and social research 158. [Doctoral thesis.]. Jyväskylä: University of Jyväskylä; 2000.
340. Ibrahim S, Scott FE, Cole DC, Shannon HS, Eyles J. *Job strain and self-reported health among working women and men: An analysis of the 1994/5 Canadian National Population Health Survey.* Women's Work, Health and Quality of Life 2001:105-124.
341. Korotkov DL. *An assessment of the (short-form) sense of coherence personality measure: Issues of validity and well-being.* Personality and Individual Differences 1993;**14**(4):575-583.
342. Persson D, Eklund M, Isacson Å. *The experience of everyday occupations and its relation to sense of coherence - a methodological study.* In: Persson D. Aspects of meaning in everyday occupations and its relationships to health-related factors. Lund university, Faculty of Medicine, Department of Clinical Neuroscience, Division of Occupational Therapy. Doctoral thesis. Lund 2001.; 1999.
343. Johansson I, Larsson G, Hamrin E. *Sense of coherence, quality of life, and function among elderly hip fracture patients.* Aging Clinical and Experimental Research 1998;**10**:377-384.
344. Ristner G, Andersson R, Johansson LM, Johansson S-E, Ponzer S. *Sense of coherence and lack of control in relation to outcome after orthopaedic injuries.* Injury, International Journal of Care Injured 2000;**31**:751-756.
