# Supplementary material
Source: PubMed Central journal article supplement (PMC1757043)
Supplement: jepicomh_59_6_460__2.pdf [file jepicomh_59_6_460__2.pdf]

**Table 9.** Papers included in the review.

1. Abel T, Walter E, Niemann S, Weitkunat R. *The Berne-Munich Lifestyle Panel. Background and baseline results from a longitudinal health lifestyle survey.* Sozial- und Präventivmedizin 1999;**44**(3):91-106.
2. Abjörnsson G, Pålsson B, Bergendorf U, Karlson B, Österberg K, Seger L, et al. *Long-term follow-up of psychological distress, social functioning, and coping style in treated and untreated patients with solvent-induced chronic toxic encephalopathy.* Journal of Occupational and Environmental Medicine 1998;**40**(9):801-807.
3. Abrahamsson A, Ejlertsson G. *A salutogenic perspective could be of practical relevance for the prevention of smoking amongst pregnant women.* Midwifery 2002;**18**(4):323-331.
4. Adams TB, Bezner JR, Drabbs ME, Zambarano RJ, Steinhardt MA. *Conceptualization and measurement of the spiritual and psychological dimensions of wellness in a college population.* Journal of American College Health 2000;**48**(4):165-173.
5. Agardh EE, Ahlbom A, Andersson T, Efendic S, Grill V, Hallqvist J, et al. *Work stress and low sense of coherence is associated with type 2 diabetes in middle-aged Swedish women.* Diabetes Care 2003;**26**(3):719-724.
6. Albertsen K, Nielsen ML, Borg V. *The Danish psychosocial work environment and symptoms of stress: the main, mediating and moderating role of sense of coherence.* Work and Stress 2001;**15**(3):241-253.
7. Allison KR, Adlaf EM, Ialomiteanu A, Rehm J. *Predictors of health risk behaviours among young adults: Analysis of the national population health survey.* Canadian Journal of Public Health-Revue Canadienne De Sante Publique 1999;**90**(2):85-89.
8. Amelang M. *Using personality variables to predict cancer and heart disease.* European Journal of Personality 1997;**11**(5):319-342.
9. Amirkhan JH, Greaves H. *Sense of coherence and stress: The mechanics of a healthy disposition.* Psychology & Health 2003;**18**(1):31-62.
10. Andersen S, Berg JE. *The use of a sense of coherence test to predict drop-out and mortality after residential treatment of substance abuse.* Addiction Research & Theory 2001;**9**(3):239-251.
11. Andershed B, Ternstedt BM. *Involvement of relatives in the care of the dying in different care cultures: Involvement in the dark or in the light?* Cancer Nursing 1998;**21**(2):106-116.
12. Andershed B, Ternstedt BM. *Development of a theoretical framework describing relatives' involvement in palliative care.* Journal of Advanced Nursing 2001;**34**(4):554-562.
13. Anderzen I, Arnetz BB. *Psychophysiological reactions during the first year of a foreign assignment: results of a controlled longitudinal study.* Work and Stress 1997;**11**(4):304-318.
14. Anderzen I, Arnetz BB. *Psychophysiological reactions to international adjustment: Results from a controlled, longitudinal study.* Psychotherapy and Psychosomatics 1999;**68**(2):67-75.
15. Anke AGW, Fugl-Meyer AR. *Life satisfaction several years after severe multiple trauma - a retrospective investigation.* Clinical Rehabilitation 2003;**17**(4):431-442.
16. Anson O, Carmel S, Levenson A, Bonneh DY, et al. *Coping with recent life events: The interplay of personal and collective resources.* Behavioral Medicine 1993;**18**(4):159-166.

17. Anson O, Paran E, Neumann L, Chernichovsky D. *Gender differences in health perceptions and their predictors*. Social Science and Medicine 1993;**36**(4):419-427.
18. Anson O, Rosenzweig A, Shwarzmann P. *The health of women married to men in regular army service: Women who cannot afford to be ill*. Women and Health 1993;**20**(1):33-45.
19. Antonovsky A. *Can attitudes contribute to health?* Advances 1992;**8**(4):33-49.
20. Antonovsky A. *The structure and properties of the Sense of Coherence scale*. Social Science and Medicine 1993;**36**(6):725-733.
21. Antonovsky A. *Complexity, conflict, chaos, coherence, coercion and civility*. Social Science and Medicine 1993;**37**(8):969-974.
22. Antonovsky A. *The moral and the healthy: Identical, overlapping, or orthogonal?* Israel Journal of Psychiatry and Related Sciences 1995;**32**(1):5-12.
23. Antonovsky A. *The salutogenic model as a theory to guide health promotion*. Health Promotion International 1996;**11**(1):11-18.
24. Anttila T, Poikolainen K, Uutela A, Lonnqvist J. *Structure and Determinants of Worrying among Adolescent Girls*. Journal of Youth Studies 2000;**3**(1):49-60.
25. Applebee AN, Burroughs R, Stevens AS. *Creating continuity and coherence in high school literature curricula*. Research in the Teaching of English 2000;**34**(3):396-429.
26. Armour M. *Meaning making in the aftermath of homicide*. Death Studies 2003;**27**(6):519-540.
27. Arvonen T, Fianu-Jonasson A, Tyni-Lenne R. *Effectiveness of two conservative modes of physical therapy in women with urinary stress incontinence*. Neurourology and Urodynamics 2001;**20**(5):591-599.
28. Atroschi I, Andersson IH, Gummesson C, Leden I, Odenbring S, Ornstein E. *Primary care patients with musculoskeletal pain - Value of health-status and sense-of-coherence measures in predicting long-term work disability*. Scandinavian Journal of Rheumatology 2002;**31**(4):239-244.
29. Auhagen AE. *On the psychology of meaning of life*. Swiss Journal of Psychology Schweizerische Zeitschrift für Psychologie Revue Suisse de Psychologie 2000;**59**(1):34-48.
30. Austoker J. *Cancer prevention in primary care. Screening for cervical cancer*. British Medical Journal 1994;**309**(6949):241-8.
31. Avlund K, Vass M, Hendriksen C. *Onset of mobility disability among community-dwelling old men and women. The role of tiredness in daily activities*. Age Ageing 2003;**32**(6):579-84.
32. Baker M, North D, Smith DF. *Burnout, sense of coherence and sources of salutogenesis in social workers*. Psychology: A Journal of Human Behavior 1997;**34**(1):22-26.
33. Barclay CR, Smith TS. *Autobiographical remembering and self-composing*. International Journal of Personal Construct Psychology 1993;**6**(3):231-251.
34. Bayard Burfield L, Sundquist J, Johansson SE. *Ethnicity, self reported psychiatric illness, and intake of psychotropic drugs in five ethnic groups in Sweden*. Journal of Epidemiology and Community Health 2001;**55**(9):657-664.
35. Begerow B, Pfeifer M, Pospeschill M, Scholz M, Schlotthauer T, Lazarescu A, et al. *Time since vertebral fracture: An important variable concerning quality of life in patients with postmenopausal osteoporosis*. Osteoporosis International 1999;**10**(1):26-33.
36. Ben David A. *Cross-cultural differences between Russian immigrants and Israeli college students: The effect of the family on the sense of coherence*. Israel Journal of Psychiatry and Related Sciences 1996;**33**(1):13-20.

37. Ben David A, Erez Darvish T. *The effect of the family on the emotional life of Ethiopian immigrant adolescents in boarding schools in Israel*. Residential Treatment for Children and Youth 1997;**15**(2):39-50.
38. Ben-David A, Leichtentritt R. *Ethiopean and Israeli students' adjustment to college: The effect of the family, social support and individual coping styles*. Journal of Comparative Family Studies 1999;**30**(2):297-313.
39. Bengtsson-Tops A, Hansson L. *The validity of Antonovsky's Sense of Coherence measure in a sample of schizophrenic patients living in the community*. Journal of Advanced Nursing 2001;**33**(4):432-438.
40. Benzein E, Norberg A, Saveman BI. *Limitations of the Sense of Coherence Scale in a Swedish Pentecostal population*. Scandinavian Journal of Caring Sciences 1997;**11**(3):139-144.
41. Berg A, Hallberg IR. *Effects of systematic clinical supervision on psychiatric nurses' sense of coherence, creativity, work-related strain, job satisfaction and view of the effects from clinical supervision: a pre-post test design*. J Psychiatr Ment Health Nurs 1999;**6**(5):371-81.
42. Berg JE. *Use of a sense of coherence test and Hopkins Symptom Checklist to predict completion of stay in a postdetoxification counseling unit*. American Journal on Addictions 1996;**5**(4):327-333.
43. Berg JE. *Completers from a detoxification unit: Some cost-benefit considerations after using psychometric tests*. Substance Abuse 1997;**18**(3):105-112.
44. Berg JE, Andersen S. *Sense of coherence evaluated by treatment counsellors and substance abusers as an indication of length of stay*. European Addiction Research 1997;**3**(2):99-102.
45. Berg JE, Andersen S. *Mortality 5 years after detoxification and counseling as indicated by psychometric tests*. Substance Abuse 2001;**22**(1):1-10.
46. Berg JE, Andersen S, Brevik JI, Alveberg PO. *Drug addiction as a lifestyle - The use of a new scale to observe changes in sense of coherence*. Scandinavian Journal of Social Welfare 1996;**5**(1):30-34.
47. Berg JE, Brevik JI. *Complaints that predict drop-out from a detoxification and counselling unit*. Addictive Behaviors 1998;**23**(1):35-40.
48. Bigler M, Neimeyer GJ, Brown E. *The divided self revisited: Effects of self-concept clarity and self-concept differentiation on psychological adjustment*. Journal of Social and Clinical Psychology 2001;**20**(3):396-415.
49. Bishop GD. *The sense of coherence as a resource in dealing with stress*. Psychologia: An International Journal of Psychology in the Orient 1993;**36**(4):259-265.
50. Bjarnason T. *Parents, religion and perceived social coherence: A Durkheimian framework of adolescent anomie*. Journal for the Scientific Study of Religion 1998;**37**(4):742-754.
51. Bjorvell H, Aly A, Langius A, Nordstrom G. *Indicators of Changes in Weight and Eating Behavior in Severely Obese Patients Treated in a Nursing Behavioral-Program*. International Journal of Obesity 1994;**18**(8):521-525.
52. Blomberg J, Lazar A, Sandell R. *Long-term outcome of long-term psychoanalytically oriented therapies: First findings of the Stockholm outcome of psychotherapy and psychoanalysis study*. Psychotherapy Research 2001;**11**(4):361-382.
53. Boman L, Bjorvell H, Langius A, Cedermark B. *Two models of care as evaluated by a group of women operated on for breast cancer with regard to their perceived well-being*. European Journal of Cancer Care 1999;**8**(2):87-96.

54. Botha KF, Du Plessis WF, Van Rooyen JM, Wissing MP. *Biopsychosocial determinants of self-management in culturally diverse South African patients with essential hypertension*. Journal of Health Psychology 2002;**7**(5):519-531.
55. Bowen GL, Richman JM, Brewster A, Bowen N. *Sense of school coherence, perceptions of danger at school, and teacher support among youth at risk of school failure*. Child & Adolescent Social Work Journal 1998;**15**(4):273-286.
56. Bowman BJ. *Cross-cultural validation of Antonovsky's Sense of Coherence Scale*. Journal of Clinical Psychology 1996;**52**(5):547-549.
57. Bowman BJ. *Cultural pathways toward Antonovsky's Sense of Coherence*. Journal of Clinical Psychology 1997;**53**(2):139-142.
58. Bruni N. *The nurse educator as teacher: exploring the construction of the 'reluctant instructor'*. Nurs Inq 1997;**4**(1):34-40.
59. Bryant LL, Corbett KK, Kutner JS. *In their own words: A model of healthy aging*. Social Science and Medicine 2001;**53**(7):927-941.
60. Bränholm I-B, Fugl-Meyer AR, Frölunde A. *Life satisfaction, sense of coherence and locus of control in occupational therapy students*. Scandinavian Journal of Occupational Therapy 1998;**5**:39-44.
61. Buchi S, Sensky T, Allard S, Stoll T, Schnyder U, Klaghofer R, et al. *Sense of coherence - A protective factor for depression in rheumatoid arthritis*. Journal of Rheumatology 1998;**25**(5):869-875.
62. Buchi S, Villiger P, Kauer Y, Klaghofer R, Sensky T, Stoll T. *PRISM (Pictorial Representation of Illness and Self Measure) - a novel visual method to assess the global burden of illness in patients with systemic lupus erythematosus*. Lupus 2000;**9**(5):368-373.
63. Buddeberg-Fischer B, Klaghofer R, Schnyder U. *Sense of coherence in adolescents*. Sozial-Und Präventivmedizin 2001;**46**(6):404-410.
64. Bäärnhielm S, Ekblad S. *Turkish migrant women encountering health care in Stockholm: A qualitative study of somatization and illness meaning*. Culture, Medicine and Psychiatry 2000;**24**:431-452.
65. Cai D, Giles H, Noels K. *Elderly perceptions of communication with older and younger adults in China: Implications for mental health*. Journal of Applied Communication Research 1998;**26**(1):32-51.
66. Callahan LF, Pincus T. *The Sense of Coherence Scale in patients with rheumatoid arthritis*. Arthritis Care and Research 1995;**8**(1):28-35.
67. Caltabiano ML, Holzheimer M. *Dispositional factors, coping and adaptation during menopause*. Climacteric 1999;**2**(1):21-8.
68. Cardoso ED, Chan F, Berven NL, Thomas KR. *Measuring readiness to change among individuals in residential therapeutic community programs for treatment of substance abuse*. Rehabilitation Counseling Bulletin 2003;**47**(1):34-44,49.
69. Carstens JA, Spangenberg JJ. *Major depression: A breakdown in sense of coherence?* Psychological Reports 1997;**80**(3, Pt 2):1211-1220.
70. Cassileth BR. *The aim of psychotherapeutic intervention in cancer-patients*. Supportive Care in Cancer 1995;**3**(4):267-269.
71. Cederblad M. *The children of the Lundby study as adults: A salutogenic perspective*. European Child & Adolescent Psychiatry 1996;**5**:38-43.
72. Cederblad M, Dahlin L, Hagnell O, Hansson K. *Salutogenic childhood factors reported by middle-aged individuals - Follow-up of the children from the Lundby Study grown up in families experiencing 3 or more childhood psychiatric risk-factors*. European Archives of Psychiatry and Clinical Neuroscience 1994;**244**(1):1-11.

73. Cederblad M, Dahlin L, Hagnell O, Hansson K. *Coping with life span crises in a group at risk of mental and behavioral disorders: From the Lundby study*. Acta Psychiatrica Scandinavica 1995;**91**(5):322-330.
74. Cederblad M, Hansson K. *Sense of coherence--a concept influencing health and quality of life in a Swedish psychiatric at-risk group*. Isr J Med Sci 1996;**32**(3-4):194-9.
75. Cederblad M, Pruksachatkunakorn P, Boripunkul T, Höök B. *Behaviour problems and competence in Thai children and youths: Teachers', parents' and subjects' perspectives*. Transcultural Psychiatry 2001;**38**(1):64-79.
76. Cederblad M, Pruksachatkunakorn P, Boripunkul T, Intraprasert S, Hook B. *Sense of coherence in a Thai sample*. Transcult Psychiatry 2003;**40**(4):585-600.
77. Cederfjaell C, Langius Ekloef A, Lidman K, Wredling R. *Gender differences in perceived health-related quality of life among patients with HIV infection*. AIDS Patient Care and STD's 2001;**15**(1):31-39.
78. Cederfjaell C, Langius Ekloef A, Lidman K, Wredling R. *Self-reported adherence to antiretroviral treatment and degree of sense of coherence in a group of HIV-infected patients*. AIDS Patient Care and STD's 2002;**16**(12):609-616.
79. Chamberlain K, Petrie K, Azariah R. *The role of optimism and sense of coherence in predicting recovery following surgery*. Psychology and Health 1992;**7**(4):301-310.
80. Chamberlain K, Zika S. *Stability and change in subjective well-being over short time periods*. Social Indicators Research 1992;**26**(2):101-117.
81. Charlton BG. *Senescence, cancer and 'endogenous parasites': A salutogenic hypothesis*. Journal of the Royal College of Physicians of London 1996;**30**(1):10-12.
82. Charmaz K. *Identity Dilemmas of Chronically Ill Men*. Sociological Quarterly 1994;**35**(2):269-288.
83. Cheung P, Spears G. *Psychiatric morbidity among New Zealand Cambodians: The role of psychosocial factors*. Social Psychiatry and Psychiatric Epidemiology 1995;**30**(2):92-97.
84. Chumblor NR, Grimm JW, Cody M, Beck C. *Gender, kinship and caregiver burden: the case of community-dwelling memory impaired seniors*. International Journal of Geriatric Psychiatry 2003;**18**(8):722-732.
85. Cilliers F. *Burnout and salutogenic functioning of nurses*. Curationis 2003;**26**(1):62-74.
86. Cochrane VM, Slade P. *Appraisal and coping in adults with cleft lip: Associations with well-being and social anxiety*. British Journal of Medical Psychology 1999;**72**(4):485-503.
87. Cohen O. *On the origins of a sense of coherence: Sociodemographic characteristics, or narcissism as a personality trait*. Social Behavior and Personality 1997;**25**(1):49-57.
88. Cohen O, Dekel R. *Sense of coherence, ways of coping, and well being of married and divorced mothers*. Contemporary Family Therapy: An International Journal 2000;**22**(4):467-486.
89. Cohen O, Savaya R. *Sense of coherence and adjustment to divorce among Muslim Arab citizens of Israel*. European Journal of Personality 2003;**17**(4):309-326.
90. Collins JF, Hanson K, Mulhern M, Padberg RM. *Sense of coherence over time in cancer patients: A preliminary report*. Medical Psychotherapy: An International Journal 1992;**5**:73-82.
91. Coward DD. *Self-transcendence and correlates in a healthy population*. Nursing Research 1996;**45**(2):116-121.

92. Cowley S, Billings JR. *Resources revisited: salutogenesis from a lay perspective*. Journal of Advanced Nursing 1999;**29**(4):994-1004.
93. Cutillo-Schmitter TA. *Aging: broadening our view for improved nursing care*. Journal of Gerontological Nursing 1996;**22**(7):31-42.
94. Dahlin L, Cederblad M. *Salutogenesis--protective factors for individuals brought up in a high-risk environment with regard to the risk for a psychiatric or social disorder*. Nordic Journal of Psychiatry 1993;**47**(1):53-60.
95. Dalbokova D, Tzenova B, Ognjanova V. *Stress states in nuclear operators under conditions of shiftwork*. Work and Stress 1995;**9**(2-3):305-313.
96. Dangoor N, Florian V. *Women with chronic physical disabilities: correlates of their long-term psychosocial adaptation*. International Journal of Rehabilitation Research 1994;**17**(2):159-68.
97. Dantas RAS, Motzer SA, Ciol MA. *The relationship between quality of life, sense of coherence and self-esteem in persons after coronary artery bypass graft surgery*. International Journal of Nursing Studies 2002;**39**(7):745-755.
98. Davey Smith G, Egger M. *Changes in population distribution of sense of coherence do not explain changes in overall mortality*. British Medical Journal 1997;**315**(7106):490.
99. Delbar V, Benor DE. *Impact of a nursing intervention on cancer patients' ability to cope*. Journal of Psychosocial Oncology 2001;**19**(2):57-75.
100. Dossey L. *Antonovsky's perspective may not go far enough*. Advances 1994;**10**(3):13-15.
101. Drory Y, Kravetz S, Florian V. *Psychosocial adjustment in patients after a first acute myocardial infarction: The contribution of salutogenic and pathogenic variables*. Archives of Physical Medicine and Rehabilitation 1999;**80**(7):811-818.
102. Drory Y, Kravetz S, Hirschberger G. *Long-term mental health of men after a first acute myocardial infarction*. Archives of Physical Medicine and Rehabilitation 2002;**83**(3):352-359.
103. Dudek B, Koniarek J. *Relationship between sense of coherence and post-traumatic stress disorder symptoms among firefighters*. International Journal of Occupational Medicine and Environmental Health 2000;**13**(4):299-305.
104. Dudek B, Makowska Z. *Psychometric characteristics of the Orientation to Life Questionnaire for measuring the sense of coherence*. Polish Psychological Bulletin 1993;**24**(4):309-318.
105. Due EP, Holstein BE. *"Sense of coherence", socialgruppe og helbred i en dansk befolkningsundersøgelse*. Ugeskrift for Laeger 1998;**160**(51):7424-7429.
106. Ebert SA, Tucker DC, Roth DL. *Psychological resistance factors as predictors of general health status and physical symptom reporting*. Psychology, Health and Medicine 2002;**7**(3):363-375.
107. Edman L, Larsen J, Haegglund H, Gardulf A. *Health-related quality of life, symptom distress and sense of coherence in adult survivors of allogeneic stem-cell transplantation*. European Journal of Cancer Care 2001;**10**(2):124-130.
108. Edwards D, Besseling E. *Relationship between depression, anxiety, sense of coherence, social support and religious involvement in a small rural community affected by industrial relations conflict*. South African Journal of Psychology 2001;**31**(4):62-71.
109. Edwards MJ, Holden RR. *Coping, meaning in life, and suicidal manifestations: Examining gender differences*. Journal of Clinical Psychology 2001;**57**(12):1517-1534.

110. Ekblad S, Wennstrom C. *Relationships between traumatic life events, symptoms and Sense of Coherence subscale meaningfulness in a group of refugee and immigrant patients referred to a psychiatric outpatient clinic in Stockholm*. Scandinavian Journal of Social Welfare 1997;**6**(4):279-285.
111. Eklund M, Hansson L. *Determinants of satisfaction with community-based psychiatric services: A cross-sectional study among schizophrenia outpatients*. Nordic Journal of Psychiatry 2001;**55**(6):413-418.
112. Eklund M, Hansson L, Bejerholm U. *Relationships between satisfaction with occupational factors and health-related variables in schizophrenia outpatients*. Social Psychiatry and Psychiatric Epidemiology 2001;**36**(2):79-85.
113. Eklund PG, Sivberg B. *Adolescents' lived experience of epilepsy*. The Journal of Neuroscience Nursing 2003;**35**(1):40-9.
114. Ekman I, Fagerberg B, Lundman B. *Health-related quality of life and sense of coherence among elderly patients with severe chronic heart failure in comparison with healthy controls*. Heart & Lung 2002;**31**(2):94-101.
115. Elovainio M, Kivimaki M. *Sense of coherence and social support - Resources for subjective well-being and health of the aged in Finland*. International Journal of Social Welfare 2000;**9**(2):128-135.
116. Eriksson NG, Lundin T. *Early traumatic stress reactions among Swedish survivors of the m/s Estonia disaster*. British Journal of Psychiatry 1996;**169**(6):713-716.
117. Feigin R. *The relationship between the sense of coherence and adjustment to disability studied in the context of marital interrelations*. Marriage and Family Review 1998;**27**(1-2):71-90.
118. Feldt T, Leskinen E, Kinnunen U, Ruoppila I. *The stability of sense of coherence: comparing two age groups in a 5-year follow-up study*. Personality and Individual Differences 2003;**35**(5):1151-1165.
119. Flannery RB, Perry JC, Penk WE, Flannery GJ. *Validating Antonovsky's sense of coherence scale*. Journal of Clinical Psychology 1994;**50**(4):575-577.
120. Florian V, Dangoor N. *Personal and familial adaptation of women with severe physical difficulties: A further validation of the Double ABCX model*. Journal of Marriage and the Family 1994;**56**(3):735-746.
121. Forbes DA. *Enhancing mastery and sense of coherence: Important determinants of health in older adults*. Geriatric Nursing 2001;**22**(1):29-32.
122. Forsberg A, Baeckman L, Svensson E. *Liver transplant recipients' ability to cope during the first 12 months after transplantation--A prospective study*. Scandinavian Journal of Caring Sciences 2002;**16**(4):345-352.
123. Forsberg C, Bjoervell H. *Living with cancer: Perceptions of well-being*. Scandinavian Journal of Caring Sciences 1996;**10**(2):109-115.
124. Forsberg C, Bjoervell H, Cedermark B. *Well-being and its relation to coping ability in patients with colo-rectal and gastric cancer before and after surgery*. Scandinavian Journal of Caring Sciences 1996;**10**(1):35-44.
125. Forsgaerde M, Westman B, Nygren L. *Ethical discussion groups as an intervention to improve the climate in interprofessional work with the elderly and disabled*. Journal of Interprofessional Care 2000;**14**(4):351-362.
126. Frankenhoff C. *Antonovsky's sense of coherence concept: an instrument for primary prevention in social work services*. International Social Work 1998;**41**(4):511-522.
127. Freire M, Hardy R, Sheiham A. *Mothers' sense of coherence and their adolescent children's oral health status and behaviours*. Community Dent Health 2002;**19**(1):24-31.

128. Freire MDM, Sheiham A, Hardy R. *Adolescents' sense of coherence, oral health status, and oral health-related behaviours*. Community Dentistry and Oral Epidemiology 2001;**29**(3):204-212.
129. Frenz AW, Carey MP, Jorgensen RS. *Psychometric evaluation of Antonovsky's Sense of Coherence Scale*. Psychological Assessment 1993;**5**(2):145-153.
130. Friborg O, Hjemdal O, Rosenvinge JH, Martinussen M. *A new rating scale for adult resilience: what are the central protective resources behind healthy adjustment?* International Journal of Methods in Psychiatric Research 2003;**12**(2):65-76.
131. Friedemann ML, Musgrove JA. *Perceptions of inner city substance abusers about their families*. Archives of Psychiatric Nursing 1994;**8**(2):115-123.
132. Frommberger U, Stieglitz RD, Straub S, Nyberg E, Schlickewei W, Kuner E, et al. *The concept of "sense of coherence" and the development of posttraumatic stress disorder in traffic accident victims*. Journal of Psychosomatic Research 1999;**46**(4):343-348.
133. Fuglsang AK, Moergeli H, Hepp-Beg S, Schnyder U. *Who develops acute stress disorder after accidental injuries?* Psychotherapy and Psychosomatics 2002;**71**(4):214-222.
134. Gallagher TJ, Wagenfeld MO, Baro F, Haepers K. *Sense of coherence, coping and caregiver role overload*. Social Science and Medicine 1994;**39**(12):1615-1622.
135. Gana K. *Is sense of coherence a mediator between adversity and psychological well-being in adults?* Stress and Health: Journal of the International Society for the Investigation of Stress 2001;**17**(2):77-83.
136. Gana K, Boblique C. *Coping and burnout among police officers and teachers: Test of a model*. European Review of Applied Psychology/Revue Europeenne de Psychologie Appliquee 2000;**50**(4):423-430.
137. Gana K, Garnier S. *Latent structure of the sense of coherence scale in a French sample*. Personality and Individual Differences 2001;**31**(7):1079-1090.
138. George LK, Ellison CG, Larson DB. *Explaining the relationships between religious involvement and health*. Psychological Inquiry 2002;**13**(3):190-200.
139. George LK, Larson DB, Koenig HG, McCullough ME. *Spirituality and health: What we know, what we need to know*. Journal of Social and Clinical Psychology 2000;**19**(1):102-116.
140. George VD. *Field-workers' sense of coherence and perception of risk when making home visits*. Public Health Nursing 1996;**13**(4):244-252.
141. George VD. *African American women's health self-assessment: health status and the sense of coherence*. J Natl Black Nurses Assoc 1999;**10**(1):9-23.
142. Georgellis A, Lindelof B, Lundin A, Arnetz B, Hillert L. *Multiple chemical sensitivity in male painters; a controlled provocation study*. International Journal of Hygiene and Environmental Health 2003;**206**(6):531-538.
143. Germano D, Misajon R, Cummins RA. *Quality of life and sense of coherence in people with arthritis*. Journal of Clinical Psychology in Medical Settings 2001;**8**(4):253-261.
144. Geyer S. *Some conceptual considerations on the sense of coherence*. Social Science and Medicine 1997;**44**(12):1771-1779.
145. Gibson LM. *Inter-relationships among sense of coherence, hope, and spiritual perspective (inner resources) of African-American and European-American breast cancer survivors*. Applied Nursing Research 2003;**16**(4):236-244.
146. Gibson LM, Cook MJ. *Neuroticism and sense of coherence*. Psychological Reports 1996;**79**(1):343-349.



147. Gibson LM, Cook MJ. *Do health questionnaires which do not consider sex differences miss important information?* Psychological Reports 1997;**81**(1):163-171.
148. Gibson LM, Parker V. *Inner resources as predictors of psychological well-being in middle-income African American breast cancer survivors.* Cancer Control 2003;**10**(5 Suppl):52-9.
149. Gilbar O. *Relationship between burnout and sense of coherence in health social workers.* Social Work in Health Care 1998;**26**(3):39-49.
150. Gilbar O. *Coping with threat: Implications for women with a family history of breast cancer.* Psychosomatics: Journal of Consultation Liaison Psychiatry 1998;**39**(4):329-339.
151. Gilbar O. *Do attitude toward cancer, sense of coherence and family high risk predict more psychological distress in women referred for a breast cancer examination?* Women & Health 2003;**38**(2):35-46.
152. Gilbar O, Borovik R. *How daughters of women with breast cancer cope with the threat of the illness.* Behavioral Medicine 1998;**24**(3):115-121.
153. Giotakos O. *Suicidal ideation, substance use, and sense of coherence in Greek male conscripts.* Military Medicine 2003;**168**(6):447-450.
154. Graham K. *Alcohol abstention among older adults: Reasons for abstaining and characteristics of abstainers.* Addiction Research 1998;**6**(6):473-487.
155. Groholt EK, Stigum H, Nordhagen R, Kohler L. *Is parental sense of coherence associated with child health?* European Journal of Public Health 2003;**13**(3):195-201.
156. Grundy D. *Parricide postponed: A discussion of some writing problems.* Contemporary Psychoanalysis 1993;**29**(4):693-710.
157. Guldvog B. *Can patient satisfaction improve health among patients with angina pectoris?* International Journal for Quality in Health Care 1999;**11**(3):233-240.
158. Gyllensten AL, Ekdahl C, Hansson L. *Validity of the Body Awareness Scale--Health (BAS-H).* Scandinavian Journal of Caring Sciences 1999;**13**(4):217-226.
159. Haggman-Laitila A, Pietila AM. *Life control and health in view of qualitative and quantitative research.* International Journal of Nursing Practice 1998;**4**(2):103-12.
160. Hallgren A, Kihlgren M, Norberg A, Forslin L. *Women's perceptions of childbirth and childbirth education before and after education and birth.* Midwifery 1995;**11**(3):130-7.
161. Hall-Lord ML, Larsson G, Steen B. *Chronic pain and distress in older people: a cluster analysis.* International Journal of Nursing Practice 1999;**5**(2):78-85.
162. Hall-Lord ML, Steen B, Larsson G. *Postoperative experiences of pain and distress in elderly patients. An explorative study.* Aging Clinical and Experimental Research 1999;**11**(2):73-82.
163. Hanse JJ, Engstrom T. *Sense of coherence and ill health among the unemployed and re-employed after closure of an assembly plant.* Work and Stress 1999;**13**(3):204-222.
164. Hansson K. *Long-Term Marriages - a Study of Couples Who Have Been Married or Lived Together for Approximately 25 Years.* Nordisk Psykologi 1994;**46**(4):241-256.
165. Hansson K, Olsson M. *Sense of coherence - a human endeavour.* Nordisk Psykologi 2001;**53**(3):238-255.
166. Haour-Knipe M. *Family sense of coherence (SOC) and adapting to a new culture. A case study.* Polish Psychological Bulletin 1999;**30**(4):311-321.
167. Harri M. *The sense of coherence among nurse educators in Finland.* Nurse Education Today 1998;**18**(3):202-212.

168. Hassmen P, Koivula N, Uutela A. *Physical exercise and psychological well-being: A population study in Finland*. Preventive Medicine 2000;**30**(1):17-25.
169. Hawley DJ, Wolfe F, Cathey MA. *The Sense of Coherence Questionnaire in Patients with Rheumatic Disorders*. Journal of Rheumatology 1992;**19**(12):1912-1918.
170. Hazel KL, Mohatt GV. *Cultural and spiritual coping in sobriety: Informing substance abuse prevention for Alaska Native communities*. Journal of Community Psychology 2001;**29**(5):541-562.
171. Hedov G, Anneren G, Wikblad K. *Swedish parents of children with Down's syndrome: Parental stress and sense of coherence in relation to employment rate and time spent in child care*. Scandinavian Journal of Caring Sciences 2002;**16**(4):424-430.
172. Hellstrom C, Jansson B, Carlsson SG. *Subjective future as a mediating factor in the relation between pain, pain-related distress and depression*. European Journal of Pain 1999;**3**(3):221-233.
173. Hensing G, Alexanderson K. *The relation of adult experience of domestic harassment, violence, and sexual abuse to health and sickness absence*. International Journal of Behavioral Medicine 2000;**7**(1):1-18.
174. Hillert L, Savlin P, Berg AL, Heidenberg A, Kolmodin-Hedman B. *Environmental illness - effectiveness of a salutogenic group-intervention programme*. Scandinavian Journal of Public Health 2002;**30**:166-175.
175. Hittner JB. *Novel methods for analyzing multifaceted personality scales: Sense of coherence and depression as an example*. Journal of Psychology 2000;**134**(2):199-209.
176. Hoefler R, Straus F. *Sense of coherence and health in disadvantaged adolescents*. International Journal of Adolescent Medicine and Health 1997;**9**(4):271-283.
177. Hollnagel H, Malterud K. *Shifting attention from objective risk factors to patients' self-assessed health resources: Clinical model for general practice*. Family Practice 1995;**12**(4):423-429.
178. Hollnagel H, Malterud K, Witt K. *Men's self-assessed personal health resources: Approaching patients' strong points in general practice*. Family Practice 2000;**17**(6):529-534.
179. Hood SC, Beaudet MP, Catlin G. *A healthy outlook*. Health Reports 1996;**7**(4):25-32, 27-35.
180. Horsburgh ME, Rice VH, Matuk L. *Sense of coherence and life satisfaction: patient and spousal adaptation to home dialysis*. Anna J 1998;**25**(2):219-28; discussion 229-30.
181. Ibrahim SA, Scott FE, Cole DC, Shannon HS, Eyles J. *Job strain and self-reported health among working women and men: An analysis of the 1994/5 Canadian National Population Health Survey*. Women and Health 2001;**33**(1-2):105-124.
182. Ikegawa M, Kimura M, Makita K, Itokawa Y. *Psychological studies of a Japanese winter-over group at Asuka Station, Antarctica*. Aviation, Space, and Environmental Medicine 1998;**69**(5):452-467.
183. Ing JD, Reutter L. *Socioeconomic status sense of coherence and health in Canadian women*. Canadian Journal of Public Health-Revue Canadienne De Sante Publique 2003;**94**(3):224-228.
184. Ingram KM, Corning AF, Schmidt LD. *The relationship of victimization experiences to psychological well-being among homeless women and low-income housed women*. Journal of Counseling Psychology 1996;**43**(2):218-227.

185. Jahnsen R, Villien L, Stanghelle JK, Holm I. *Coping potential and disability - sense of coherence in adults with cerebral palsy*. Disability and Rehabilitation: An International Multidisciplinary Journal 2002;**24**(10):511-518.
186. Jakobsson L. *Indwelling catheter treatment and health-related quality of life in men with prostate cancer in comparison with men with benign prostatic hyperplasia*. Scandinavian Journal of Caring Sciences 2002;**16**(3):264-271.
187. Jakobsson L, Hallberg IR, Loven L. *Experiences of daily life and life quality in men with prostate cancer. An explorative study. Part I*. European Journal of Cancer Care (Engl) 1997;**6**(2):108-16.
188. Jakobsson L, Hallberg IR, Loven L. *Met and unmet nursing care needs in men with prostate cancer. An explorative study. Part II*. European Journal of Cancer Care (Engl) 1997;**6**(2):117-23.
189. Jamison JR. *A psychological profile of fibromyalgia patients: A chiropractic case study*. Journal of Manipulative and Physiological Therapeutics 1999;**22**(7):454-457.
190. Joachim B, Lyon DD, Farrell SP. *Augmenting treatment of obsessive-compulsive disorder with Antonovsky's sense of coherence theory*. Perspectives in Psychiatric Care 2003;**39**(4):163-8.
191. Johansson I, Hamrin E, Larsson G. *Evaluation of the prognostic value of the health assessment form among patients clinically ready for discharge*. Journal of Nursing Management 1994;**2**(2):77-85.
192. Johansson I, Larsson G, Hamrin E. *Sense of coherence, quality of life, and function among elderly hip fracture patients*. Aging-Clinical and Experimental Research 1998;**10**(5):377-384.
193. Johnsen MHS, Soviknes I, Torsheim T. *Mestringsressurser og opplevd skolerelatert stress: en prospektiv studie av gjensidige sammenhenger. / Salutogenic coping resources and school-related stress: A prospective study of reciprocal effects*. Tidsskrift for Norsk Psykologforening 2001;**38**(9):821-828.
194. Johnston B. *Managing change in health care redesign: A model to assist staff in promoting healthy change*. Nursing Economics 1998;**16**(1):12-17.
195. Jonsson A, Segesten K, Mattsson B. *Post-traumatic stress among Swedish ambulance personnel*. Emergency Medicine Journal 2003;**20**(1):79-84.
196. Jorgensen RS, Frankowski JJ, Carey MP. *Sense of coherence, negative life events and appraisal of physical health among university students*. Personality and Individual Differences 1999;**27**(6):1079-1089.
197. Juvonen-Posti P, Kallanranta T, Eksyma SL, Piirainen K, Keinanen-Kiukaanniemi S. *Into work, through tailored paths: a two-year follow-up of the return-to-work rehabilitation and re-employment project*. International Journal of Rehabilitation Research 2002;**25**(4):313-330.
198. Kaiser CF, Sattler DN, Bellack DR, Dersin J. *A conservation of resources approach to a natural disaster: Sense of coherence and psychological distress*. Journal of Social Behavior and Personality 1996;**11**(3):459-476.
199. Kalimo R, Pahkin K, Mutanen P. *Work and personal resources as long-term predictors of well-being*. Stress and Health 2002;**18**(5):227-234.
200. Kalimo R, Pahkin K, Mutanen P, Toppinen-Tanner S. *Staying well or burning out at work: work characteristics and personal resources as long-term predictors*. Work and Stress 2003;**17**(2):109-122.
201. Kallenberg K. *Spiritual and existential issues in palliative care*. Illness, Crisis and Loss 2000;**8**(2):120-130.

202. Kamwendo K, Hansson M, Hjerpe I. *Relationships between adherence, sense of coherence, and knowledge in cardiac rehabilitation*. Rehabilitation Nursing 1998;**23**(5):240-5, 251.
203. Kark JD, Carmel S, Sinnreich R, Goldberger N, Friedlander Y. *Psychosocial factors among members of religious and secular kibbutzim*. Israel Journal of Medical Sciences 1996;**32**(3-4):185-194.
204. Karlson B, Seger L, Osterberg K, Abjornsson G, Orbaek P. *Stress management in men with solvent-induced chronic toxic encephalopathy*. Journal of Occupational and Environmental Medicine 2000;**42**(6):670-675.
205. Karlsson I, Berglin E, Larsson PA. *Sense of coherence: quality of life before and after coronary artery bypass surgery - a longitudinal study*. Journal of Advanced Nursing 2000;**31**(6):1383-1392.
206. Karlsson I, Berglin E, Pettersson G, Larsson PA. *Predictors of chest pain after coronary artery bypass grafting*. Scandinavian Cardiovascular Journal 1999;**33**(5):289-294.
207. Karlsson I, Rasmussen C, Ravn J, Thiis JJ, Pettersson G, Larsson PA. *Chest pain after coronary artery bypass: Relation to coping capacity and quality of life*. Scandinavian Cardiovascular Journal 2002;**36**(1):41-47.
208. Kaslow FW, Hansson K, Lundblad AM. *Long-Term Marriages in Sweden - and Some Comparisons with Similar Couples in the United-States*. Contemporary Family Therapy 1994;**16**(6):521-537.
209. Kasmani SS, Ow R. *Worldviews and resilience in children of divorced families*. Asia Pacific Journal of Social Work 2001;**11**:37-50.
210. Kertzner R. *Self-appraisal of life experience and psychological adjustment in midlife gay men*. Journal of Psychology and Human Sexuality 1999;**11**(2):43-64.
211. Kivimaeki M, Feldt T, Vahtera J, Nurmi JE. *Sense of coherence and health: Evidence from two cross-lagged longitudinal samples*. Social Science and Medicine 2000;**50**(4):583-597.
212. Kivimaeki M, Elovainio M, Vahtera J, Nurmi JE, Feldt T, Keltikangas Jaervinen L, et al. *Sense of coherence as a mediator between hostility and health: Seven-year prospective study on female employees*. Journal of Psychosomatic Research 2002;**52**(4):239-247.
213. Kivimäki M, Kalimo R, Toppinen S. *Sense of coherence as a modifier of occupational stress exposure, stress perception, and experienced strain: A study of industrial managers*. Psychological Reports 1998;**83**(3, Pt 1):971-981.
214. Kivimäki M, Vahtera J, Elovainio M, Lillrank B, Kevin MV. *Death or illness of a family member, violence, interpersonal conflict, and financial difficulties as predictors of sickness absence: Longitudinal cohort study on psychological and behavioral links*. Psychosomatic Medicine 2002;**64**(5):817-825.
215. Kivimäki M, Vahtera J, Thompson L, Griffiths A, Cox T, Pentti J. *Psychosocial factors predicting employee sickness absence during economic decline*. Journal of Applied Psychology 1997;**82**(6):858-872.
216. Klang B, Bjoervell H, Cronqvist A. *Patients with chronic renal failure and their ability to cope*. Scandinavian Journal of Caring Sciences 1996;**10**(2):89-95.
217. Klang B, Bjoervell H, Clyne N. *Quality of life in predialytic uremic patients*. Quality of Life Research 1996;**5**(1):109-116.
218. Klang B, Bjoervell H, Clyne N. *Predialysis education helps patients choose dialysis modality and increases disease-specific knowledge*. Journal of Advanced Nursing 1999;**29**(4):869-876.

219. Klevens J, Restrepo O, Roca J, Martinez A. *Comparison of offenders with early- and late-starting antisocial behavior in Colombia*. International Journal of Offender Therapy and Comparative Criminology 2000;**44**(2):194-203.
220. Klevsgard R, Hallberg IR, Risberg B, Thomsen MB. *Quality of life associated with varying degrees of chronic lower limb ischaemia: Comparison with a healthy sample*. European Journal of Vascular and Endovascular Surgery 1999;**17**(4):319-325.
221. Klevsgard R, Hallberg IR, Risberg B, Thomsen MB. *The effects of successful intervention on quality of life in patients with varying degrees of lower-limb ischaemia*. European Journal of Vascular and Endovascular Surgery 2000;**19**(3):238-245.
222. Klevsgard R, Risberg BO, Thomsen MB, Hallberg IR. *A 1-year follow-up quality of life study after hemodynamically successful or unsuccessful surgical revascularization of lower limb ischemia*. Journal of Vascular Surgery 2001;**33**(1):114-122.
223. Körlin D, Nyback H, Goldberg FS. *Creative arts groups in psychiatric care: Development and evaluation of a therapeutic alternative*. Nordic Journal of Psychiatry 2000;**54**(5):333-340.
224. Körlin D, Wrangsjö B. *Gender differences in outcome of guided imagery and music (GIM) therapy*. Nordic Journal of Music Therapy 2001;**10**(2):132-143.
225. Körlin D, Wrangsjö B. *Treatment effects of GIM therapy*. Nordic Journal of Music Therapy 2002;**11**(1):3-15.
226. Koposov RA, Ruchkin VV, Eisemann M. *Sense of coherence - A mediator between violence exposure and psychopathology in Russian juvenile delinquents*. Journal of Nervous and Mental Disease 2003;**191**(10):638-644.
227. Korotkov D, Hannah TE. *Extraversion and emotionality as proposed superordinate stress moderators: A prospective analysis*. Personality and Individual Differences 1994;**16**(5):787-792.
228. Korotkov DL. *An assessment of the (short-form) Sense of Coherence personality measure: Issues of validity and well-being*. Personality and Individual Differences 1993;**14**(4):575-583.
229. Korotkov DL. *Clarifying some issues from Korotkov (1993): A follow-up statement concerning the validity of the Sense of Coherence (short-form) personality measure*. Personality and Individual Differences 1994;**16**(3):499.
230. Krantz G, Oestergren PO. *The association between violence victimisation and common symptoms in Swedish women*. Journal of Epidemiology and Community Health 2000;**54**(11):815-821.
231. Kravetz S, Drory Y, Florian V. *Hardiness and sense of coherence and their relation to negative affect*. European Journal of Personality 1993;**7**(4):233-244.
232. Kristenson M, Kucinskiene Z, Bergdahl B, Calkauskas H, Urmonas V, Orth Gomer K. *Increased psychosocial strain in Lithuanian versus Swedish men: The LiVicordia study*. Psychosomatic Medicine 1998;**60**(3):277-282.
233. Kroll C, Blomberg H, Suominen S, Helenius H. *Sense of coherence and health in two cultures - a comparison between Finland and Japan*. In Swedish. Sosiaalilääketieteellinen aikakauslehti. Journal of Social Medicine 1998(**35**):142-151.
234. Krupnick JL. *Brief psychodynamic treatment of PTSD*. In Session-Psychotherapy in Practice 1997;**3**(4):75-89.
235. Krupnick JL. *Brief psychodynamic treatment of PTSD*. Journal of Clinical Psychology 2002;**58**(8):919-932.

236. Kuuppelomaeki M, Utriainen P. *A 3 year follow-up study of health care students' sense of coherence and related smoking, drinking and physical exercise factors.* International Journal of Nursing Studies 2003;**40**(4):383-388.
237. Lajunen T, Corry A, Summala H, Hartley L. *Cross-cultural differences in drivers' self-assessments of their perceptual-motor and safety skills: Australians and Finns.* Personality and Individual Differences 1998;**24**(4):539-550.
238. Lajunen T, Summala H. *Driving experience, personality, and skill and safety-motive dimensions in drivers' self-assessments.* Personality and Individual Differences 1995;**19**(3):307-318.
239. Lamprecht F, Sack M. *Vulnerability and salutogenesis in health and disease.* Public Health Rev 2003;**31**(1):7-21.
240. Lander R. *Professional cooperation around self-related measures in school indicator instruments.* Journal of Classroom Interaction 2002;**37**(2):27-36.
241. Landsverk SS, Kane CF. *Antonovsky's sense of coherence: Theoretical basis of psychoeducation in schizophrenia.* Issues in Mental Health Nursing 1998;**19**(5):419-431.
242. Langius A, Björvell H. *Coping ability and functional status in a Swedish population sample.* Scandinavian Journal of Caring Sciences 1993;**7**(1):3-10.
243. Langius A, Björvell H. *The applicability of the Antonovsky Sense of Coherence Scale to a group of Pentecostals.* Scandinavian Journal of Caring Sciences 2001;**15**(2):190-192.
244. Langius A, Bjoervell H, Antonovsky A. *The sense of coherence concept and its relation to personality traits in Swedish samples.* Scandinavian Journal of Caring Sciences 1992;**6**(3):165-171.
245. Langius A, Bjorvell H, Lind MG. *Functional status and coping in patients with oral and pharyngeal cancer before and after surgery.* Head Neck 1994;**16**(6):559-68.
246. Langius A, Björvell H. *Salutogenic model and utilization of the KASAM form (sense of coherence) in nursing research - a methodological report.* Vård Nord Utveckl Forsk 1996;**16**(1):28-32.
247. Langius A, Lind MG. *Well-Being and Coping in Oral and Pharyngeal Cancer-Patients.* Oral Oncology-European Journal of Cancer Part B 1995;**31B**(4):242-249.
248. Larsson BW. *Patients' views on quality of care: age effects and identification of patient profiles.* Journal of Clinical Nursing 1999;**8**(6):693-700.
249. Larsson BW, Larsson G. *Patients' views on quality of care: do they merely reflect their sense of coherence?* Journal of Advanced Nursing 1999;**30**(1):33-39.
250. Larsson G, Johansson I, Hamrin E. *Sense of coherence among elderly somatic patients: predictive power regarding future needs of care.* Journal of Nursing Management 1995;**3**(6):307-11.
251. Larsson G, Kallenberg K. *Dimensional analysis of sense of coherence using structural equation modelling.* European Journal of Personality 1999;**13**(1):51-61.
252. Larsson G, Kallenberg K, Setterlind S, Starrin B. *Health and loss of a family member: Impact of sense of coherence.* International Journal of Health Science 1994;**5**(1):5-11.
253. Larsson G, Michel PO, Lundin T. *Systematic assessment of mental health following various types of posttrauma support.* Military Psychology 2000;**12**(2):121-135.
254. Leddy SK. *Development and psychometric testing of the Leddy Healthiness Scale.* Research in Nursing and Health 1996;**19**(5):431-440.
255. Lee JW, Jones PS, Mineyama Y, Zhang XE. *Cultural differences in responses to a Likert scale.* Research in Nursing and Health 2002;**25**(4):295-306.

256. Levert T, Lucas M, Ortlepp K. *Burnout in psychiatric nurses: Contributions of the work environment and a sense of coherence*. South African Journal of Psychology 2000;**30**(2):36-43.
257. Levin J. *A prolegomenon to an epidemiology of love: Theory, measurement, and health outcomes*. Journal of Social and Clinical Psychology 2000;**19**(1):117-136.
258. Levin J. *Spiritual determinants of health and healing: An epidemiologic perspective on salutogenic mechanisms*. Alternative Therapies in Health and Medicine 2003;**9**(6):48-57.
259. Levin JS. *How religion influences morbidity and health: Reflections on natural history, salutogenesis and host resistance*. Social Science and Medicine 1996;**43**(5):849-864.
260. Lewis JS. *Sense of coherence and the strengths perspective with older persons*. Journal of Gerontological Social Work 1996;**26**(3-4):99-112.
261. Lewis SL, Bonner PN, Campbell MA, Cooper CL, Willard A. *Personality, stress, coping, and sense of coherence among nephrology nurses in dialysis settings*. Anna J 1994;**21**(6):325-35; discussion 336.
262. Lewis SL, Campbell MA, Beckett PJ, Cooper CL, Bonner PN, Hunt WC. *Work stress, burnout, and sense of coherence among dialysis nurses*. Anna Journal 1992;**19**(6):545-53, discussion 554.
263. Levy AJ, Wall JC. *Children who have witnessed community homicide: Incorporating risk and resilience in clinical work*. Families in Society 2000;**81**(4):402-411.
264. Lindström B. *The meaning of resilience*. International Journal of Adolescent Medicine and Health 2001;**13**(1):7-12.
265. Linn JG, Lewis FM, Cain VA, Kimbrough GA, et al. *HIV-illness, social support, sense of coherence, and psychosocial well-being in a sample of help-seeking adults*. AIDS Education and Prevention 1993;**5**(3):254-262.
266. Linn JG, Monnig RL, Cain VA, Usho D. *Stage of illness, level of HIV symptoms, sense of coherence and psychological functioning in clients of community-based AIDS counseling centers*. Journal of Association of Nurses AIDS Care 1993;**4**(2):24-32.
267. Linn JG, Poku KA, Cain VA, Holzapfel KM, Crawford DF. *Psychosocial outcomes of HIV illness in male and female African American clients*. Social Work in Health Care 1995;**21**(3):43-60.
268. Lips Wiersma M. *The influence of spiritual "meaning-making" on career behavior*. Journal of Management Development 2002;**21**(7):497-520.
269. Lohff B, Schaefer J, Nierhaus KH, Peters T, Schaefer T, Vos R. *Natural defenses and autoprotection: naturotherapy, an old concept of healing in a new perspective*. Medical Hypotheses 1998;**51**(2):147-151.
270. Long NH, Johansson E, Diwan VK, Winkvist A. *Fear and social isolation as consequences of tuberculosis in VietNam: a gender analysis*. Health Policy 2001;**58**(1):69-81.
271. Lundberg O. *"Sense of coherence" och befolkningens hälsa*. Journal of Social Medicine 1997;**3**:265-274.
272. Lundberg O. *Childhood conditions, sense of coherence, social class and adult ill health: Exploring their theoretical and empirical relations*. Social Science and Medicine 1997;**44**(6):821-831.
273. Lundberg O, Nyström-Peck M. *Sense of coherence, social structure and health. Evidence from a population survey in Sweden*. European Journal of Public Health 1994;**4**:252-257.

274. Lundberg O, Nysröm-Peck M. *A simplified way of measuring sense of coherence. Experiences from a population survey in Sweden.* European Journal of Public Health 1995;**5**:56-59.
275. Lundman B, Norberg A. *The Significance of a Sense of Coherence for Subjective Health in Persons with Insulin-Dependent Diabetes.* Journal of Advanced Nursing 1993;**18**(3):381-386.
276. Lundqvist T. *Chronic cannabis use and the sense of coherence.* Life Sciences 1995;**56**(23-24):2145-2150.
277. Lustig D. *Families with an adult with mental retardation: Predictors of family adjustment.* Journal of Applied Rehabilitation counseling 1999;**30**(3):11-18.
278. Lustig DC. *Families with an adult with mental retardation: Empirical family typologies.* Rehabilitation Counseling Bulletin 1997;**41**(2):138-157.
279. Lustig DC, Akey T. *Adaptation in families with adult children with mental retardation: Impact of family strengths and appraisal.* Education and Training in Mental Retardation and Developmental Disabilities 1999;**34**(3):260-270.
280. Lustig DC, Rosenthal DA, Strauser DR, Haynes K. *The relationship between sense of coherence and adjustment in persons with disabilities.* Rehabilitation Counseling Bulletin 2000;**43**(3):134-141.
281. Lustig DC, Strauser DR. *The relationship between sense of coherence and career thoughts.* Career Development Quarterly 2002;**51**(1):2-11.
282. Luszczynska A. *Sense of coherence and smoking in a sample of abused women.* Psychological Reports 2002;**90**(3,Pt2):1123-1128.
283. Lutgendorf SK, Vitaliano PP, Tripp Reimer T, Harvey JH, Lubaroff DM. *Sense of coherence moderates the relationship between life stress and natural killer cell activity in healthy older adults.* Psychology and Aging 1999;**14**(4):552-563.
284. Mackenzie ER, Rajagopal DE, Meibohm M, Lavizzo-Mourey R. *Spiritual support and psychological well-being: Older adults' perceptions of the religion and health connection.* Alternative Therapies in Health and Medicine 2000;**6**(6):37-45.
285. Mackie KS, Holahan CK, Gottlieb NH. *Employee involvement management practices, work stress, and depression in employees of a human services residential care facility.* Human Relations 2001;**54**(8):1065-1092.
286. Magen Z, Birenbaum M, Ilovich T. *Adolescents from disadvantaged neighborhoods: Personal characteristics as related to volunteer involvement.* International Journal for the Advancement of Counselling 1992;**15**(1):47-59.
287. Majumdar M, Grossman P, Dietz-Waschkowski B, Kersig S, Walach H. *Does mindfulness meditation contribute to health? Outcome evaluation of a German sample.* Journal of Alternative and Complementary Medicine 2002;**8**(6):719-730.
288. Malmgren-Olsson EB, Bränholm IB. *A comparison between three physiotherapy approaches with regard to health-related factors in patients with non-specific musculoskeletal disorders.* Disability and Rehabilitation 2002;**24**(6):308-317.
289. Malterud K, Hollnagel H. *Women's self-assessed personal health resources.* Scandinavian Journal of Primary Health Care 1997;**15**(4):163-168.
290. Malterud K, Hollnagel H. *Talking with women about personal health resources in general practice: Key questions about salutogenesis.* Scandinavian Journal of Primary Health Care 1998;**16**(2):66-71.
291. Malterud K, Hollnagel H. *Encouraging the strengths of women patients - A case study from general practice on empowering dialogues.* Scandinavian Journal of Public Health 1999;**27**(4):254-259.
292. Malterud K, Hollnagel H, Witt K. *Gendered health resources and coping - A study from general practice.* Scandinavian Journal of Public Health 2001;**29**(3):183-188.



293. Margalit M. *Loneliness and coherence among preschool children with learning disabilities*. Journal of Learning Disabilities 1998;**31**(2):173-180.
294. Margalit M, Efrati M. *Loneliness, coherence and companionship among children with learning disorders*. Educational Psychology 1996;**16**(1):69-79.
295. Margalit M, Raviv A, Ankonina DB. *Coping and coherence among parents with disabled children*. Journal of Clinical Child Psychology 1992;**21**(3):202-209.
296. Margalit M, Rochberg Y, Al Yagon M. *Home-computing model and children with learning disabilities: A systemic approach*. Learning Disability Quarterly 1995;**18**(2):68-75.
297. Margalit M, Tur Kaspas H, Most T. *Reciprocal nominations, reciprocal rejections and loneliness among students with learning disorders*. Educational Psychology 1999;**19**(1):79-90.
298. Markstrom A, Sundell K, Lysdahl M, Andersson G, Schedin U, Klang B. *Quality-of-life evaluation of patients with neuromuscular and skeletal diseases treated with noninvasive and invasive home mechanical ventilation*. Chest 2002;**122**(5):1695-700.
299. Marsella AJ. *Migration, ethnocultural diversity and future worklife: Challenges and opportunities*. Scandinavian Journal of Work, Environment and Health 1997;**23**(Suppl 4):28-46.
300. Mason WH. *Salutogenesis: an organizing structure for addictions nursing*. Perspect Addiction Nursing 1994;**5**(2):3-7.
301. Mason WH, Chandler MC, Grasso BC. *Solution based techniques applied to addictions: A clinic's experience in shifting paradigms*. Alcoholism Treatment Quarterly 1995;**13**(4):39-49.
302. Matsuura E, Ohta A, Kanegae F, Haruda Y, Ushiyama O. *Frequency and analysis of factors closely associated with the development of depressive symptoms in patients with scleroderma*. Journal of Rheumatology 2003;**30**(8):1782-1787.
303. Mburu FM. *On conflict resolution and change*. Social Science and Medicine 1993;**37**(8):974-976.
304. McCubbin HI, Thompson EA, Thompson AI, Fromer JE. *The sense of coherence: an historical and future perspective*. Israel Journal of Medicine and Science 1996;**32**(3-4):170-8.
305. McSherry WC, Holm JE. *Sense of coherence: Its effects on psychological and physiological processes prior to, during, and after a stressful situation*. Journal of Clinical Psychology 1994;**50**(4):476-487.
306. Meddin JR. *Dimensions of spiritual meaning and well-being in the lives of ten older Australians*. International Journal of Aging and Human Development 1998;**47**(3):163-175.
307. Mehlum L. *Suicidal ideation and sense of coherence in male conscripts*. Acta Psychiatrica Scandinavica 1998;**98**(6):487-492.
308. Melin R, Fugl-Meyer AR. *On prediction of vocational rehabilitation outcome at a Swedish employability institute*. Journal of Rehabilitation Medicine 2003;**35**(6):284-289.
309. Mendel B, Bergenius J, Langius A. *The sense of coherence: a tool for evaluating patients with peripheral vestibular disorders*. Clinical Otolaryngology 2001;**26**(1):19-24.
310. Menzies V. *Depression in schizophrenia: Nursing care as a generalized resistance resource*. Issues in Mental Health Nursing 2000;**21**(6):605-617.
311. Midanik LT, Soghikian K, Ransom LJ, Polen MR. *Alcohol problems and sense of coherence among older adults*. Social Science and Medicine 1992;**34**(1):43-48.

312. Miller WL, Crabtree BF, Duffy MB, Epstein RM, Stange KC. *Research guidelines for assessing the impact of healing relationships in clinical medicine*. *Alternative Therapies in Health and Medicine* 2003;**9**(3):A80-A95.
313. Mlonzi EN, Strumpfer DJW. *Antonovsky's sense of coherence scale and 16PF second-order factors*. *Social Behavior and Personality* 1998;**26**(1):39-49.
314. Mockler D, Riordan J, Murphy M. *Psychosocial factors associated with the use/non-use of mental health services by primary carers of individuals with dementia*. *International Journal of Geriatric Psychiatry* 1998;**13**(5):310-314.
315. Modell AH. *The preservation of private space*. *Contemporary Psychotherapy Review* 1993;**8**:1-13.
316. Most T, Al Yagon M, Tur Kaspas H, Margalit M. *Phonological awareness, peer nominations, and social competence among preschool children at risk for developing learning disabilities*. *International Journal of Disability, Development and Education* 2000;**47**(1):89-105.
317. Motzer SA, Hertig V, Jarrett M, Heitkemper MM. *Sense of coherence and quality of life in women with and without irritable bowel syndrome*. *Nursing Research* 2003;**52**(5):329-337.
318. Motzer SA, Jarrett M, Heitkemper MM, Tsuji J. *Natural killer cell function and psychological distress in women with and without irritable bowel syndrome*. *Biological Research for Nursing* 2002;**4**(1):31-42.
319. Motzer SU, Stewart BJ. *Sense of coherence as a predictor of quality of life in persons with coronary heart disease surviving cardiac arrest*. *Research in Nursing and Health* 1996;**19**(4):287-298.
320. Mullen PM, Smith RM, Hill EW. *Sense of coherence as a mediator of stress for cancer patients and spouses*. *Journal of Psychosocial Oncology* 1993;**11**(3):23-46.
321. Nakamura H, Matsuzaki I, Sasahara S, Hatta K, Nagase H, Oshita Y, et al. *Enhancement of a sense of coherence and natural killer cell activity which occurred in subjects who improved their exercise habits through health education in the workplace*. *Journal of Occupational Health* 2003;**45**(5):278-285.
322. Nakamura H, Ogawa Y, Nagase H, Nakajima M, Kodama N, Ogino K, et al. *Natural killer cell activity and its related psychological factor, sense of coherence in male smokers*. *Journal of Occupational Health* 2001;**43**(4):191-198.
323. Nasermoaddeli A, Sekine M, Hamanishi S, Kagamimori S. *Job strain and sleep quality in Japanese civil servants with special reference to sense of coherence*. *Journal of Occupational Health* 2002;**44**(5):337-342.
324. Nasermoaddeli A, Sekine M, Hamanishi S, Kagamimori S. *Associations of sense of coherence with sickness absence and reported symptoms of illness in Japanese civil servants*. *Journal of Occupational Health* 2003;**45**(4):231-233.
325. Nasermoaddeli A, Sekine M, Hamanishi S, Kagamimori S. *Associations between sense of coherence and psychological work characteristics with changes in quality of life in Japanese civil servants: A 1-year follow-up study*. *Industrial Health* 2003;**41**(3):236-241.
326. Nash J. *Neighborhood effects on sense of school coherence and educational behavior in students at risk of school failure*. *Children & Schools* 2002;**24**(2):73-89.
327. Neikrug SM. *Worrying about a frightening old age*. *Aging & Mental Health* 2003;**7**(5):326-333.
328. Neimeyer RA. *The role of client-generated narratives in psychotherapy*. *Journal of Constructivist Psychology* 1994;**7**(4):229-242.
329. Nesbitt BJ, Heidrich SM. *Sense of coherence and illness appraisal in older women's quality of life*. *Research in Nursing and Health* 2000;**23**(1):25-34.

330. Newton SE. *Relationship of hardiness and sense of coherence to post-liver transplant return to work*. Holistic Nursing Practice 1999;**13**(3):71-9.
331. Niemelä M. *Koherenssin tunne ja työmarkkina-asema*. Sosiaalilääketieteellinen Aikakauslehti 2002;**39**:184-191.
332. Nilsson B, Holmgren L, Stegmayr B, Westman G. *Sense of coherence - stability over time and relation to health, disease, and psychosocial changes in a general population: A longitudinal study*. Scandinavian Journal of Public Health 2003;**31**:297-304.
333. Nilsson I, Axelsson K, Gustafson Y, Lundman B, Norberg A. *Well-being, sense of coherence, and burnout in stroke victims and spouses during the first few months after stroke*. Scandinavian Journal of Caring Sciences 2001;**15**(3):203-214.
334. Nintachan P, Sompongse P. *The sense of coherence and trait-anxiety of nursing students at Ramathibodi School of Nursing: A four year follow up study during academic year 1994-1997*. Rama Nursing Journal 2000;**6**(2):119-132.
335. Nordstroem G, Luetzen K. *Acceptance of ostomy surgery: A Swedish pilot study*. Scandinavian Journal of Caring Sciences 1995;**9**(1):11-15.
336. Nyamathi A. *Comparative-study of factors relating to HIV risk level of black homeless women*. Journal of Acquired Immune Deficiency Syndromes and Human Retrovirology 1992;**5**(3):222-228.
337. Nyamathi AM. *Relationship of resources to emotional distress, somatic complaints, and high-risk behaviors in drug recovery and homeless minority women*. Journal of Health Care for the Poor and Underserved 1992;**3**(1):93-106.
338. Nyamathi AM. *Sense of coherence in minority women at risk for HIV infection*. Public Health Nursing 1993;**10**(3):151-158.
339. O'Carroll RE, Ayling R, O'Reilly SM, North NT. *Alexithymia and sense of coherence in patients with total spinal cord transection*. Psychosomatic Medicine 2003;**65**(1):151-155.
340. Olsson MB, Hwang CP. *Sense of coherence in parents of children with different developmental disabilities*. Journal of Intellectual Disability Research 2002;**46**(7):548-559.
341. Ortlepp K, Friedman M. *The relationship between Sense of Coherence and indicators of secondary traumatic stress in non-professional trauma counsellors*. South African Journal of Psychology 2001;**31**(2):38-45.
342. Ortlepp K, Friedman M. *Prevalence and correlates of secondary traumatic stress in workplace lay trauma counselors*. Journal of Traumatic Stress 2002;**15**(3):213-222.
343. Pallant JF, Lae L. *Sense of coherence, well-being, coping and personality factors: Further evaluation of the sense of coherence scale*. Personality and Individual Differences 2002;**33**(1):39-48.
344. Palsson MB, Hallberg IR, Norberg A, Bjoervell H. *Burnout, empathy and sense of coherence among Swedish district nurses before and after systematic clinical supervision*. Scandinavian Journal of Caring Sciences 1996;**10**(1):19-26.
345. Palsson MBE, Hallberg IR, Norberg A, Isovaara S. *Systematic clinical supervision and its effects for nurses handling demanding care situations - Interviews with Swedish district nurses and hospital nurses in cancer care*. Cancer Nursing 1994;**17**(5):385-394.
346. Parker A. *An experimental study of the influences of magical ideation and sense of meaning on the attribution of telepathic experience*. Journal of Mental Imagery 2000;**24**(1-2):97-110.
347. Pasikowski T, Sek H, Scigala I. *"Sense of coherence" and subjective health concepts*. Polish Psychological Bulletin 1994;**25**(1):15-23.

348. Passy F, Giugni M. *Life-spheres, networks, and sustained participation in social movements: A phenomenological approach to political commitment*. Sociological Forum 2000;**15**(1):117-144.
349. Pedersen JB. *The psychological process of ageing: What does it mean to get old?* Nordic Journal of Psychiatry 1993;**47**(Suppl 28):49-51.
350. Persson L, Hallberg IR. *Acute leukaemia and malignant lymphoma patients' experiences of disease, treatment and nursing care during the active treatment phase: an explorative study*. European Journal of Cancer Care (Engl) 1995;**4**(3):133-42.
351. Persson L, Hallberg IR, Ohlsson O. *Survivors of acute leukaemia and highly malignant lymphoma - Retrospective views of daily life problems during treatment and when in remission*. Journal of Advanced Nursing 1997;**25**(1):68-78.
352. Persson L, Larsson G, Ohlsson O, Hallberg IR. *Acute leukaemia or highly malignant lymphoma patients' quality of life over two years: A pilot study*. European Journal of Cancer Care 2001;**10**(1):36-47.
353. Petrie K, Brook R. *Sense of coherence, self-esteem, depression and hopelessness as correlates of reattempting suicide*. British Journal of Clinical Psychology 1992;**31**(3):293-300.
354. Phillips BN. *Trainers of school psychologists and Council of Directors of School Psychology Programs: A new chapter in the history of school psychology*. Journal of School Psychology 1993;**31**(1):91-108.
355. Pierce LL. *Coherence in the urban family caregiver role with African American stroke survivors*. Topics in Stroke Rehabilitation 2001;**8**(3):64-72.
356. Pietila AM. *Life control and health*. International Journal of Circumpolar Health 1998;**57**(2-3):211-7.
357. Polewka A, Chrostek Maj J, Kroch S. *Psychosocial aspects of the suicidal attempts of Polish females*. Archives of Psychiatry and Psychotherapy 2001;**3**(2):51-60.
358. Poppius E, Tenkanen L, Hakama M, Kalimo R, Pitkanen T. *The sense of coherence, occupation and all-cause mortality in the Helsinki Heart Study*. European Journal of Epidemiology 2003;**18**(5):389-393.
359. Poppius E, Tenkanen L, Kalimo R, Heinsalmi P. *The sense of coherence, occupation and the risk of coronary heart disease in the Helsinki Heart Study*. Social Science and Medicine 1999;**49**(1):109-120.
360. Radley A. *The aesthetics of illness: narrative, horror and the sublime*. Sociology of Health & Illness 1999;**21**(6):778-796.
361. Raif R, Rimmerman A. *Parental attitudes to out-of-home placement of young children with developmental disabilities*. Int J Rehabil Res 1993;**16**(2):97-105.
362. Rak CF, Patterson LE. *Promoting resilience in at-risk children*. Journal of Counseling and Development 1996;**74**(4):368-373.
363. Ramfelt E, Langius A, Bjoervell H, Nordstroem G. *Treatment decision-making and its relation to the sense of coherence and the meaning of the disease in a group of patients with colorectal cancer*. European Journal of Cancer Care 2000;**9**(3):158-165.
364. Ramfelt E, Severinsson E, Lutzen K. *Attempting to find meaning in illness to achieve emotional coherence*. Cancer Nursing 2002;**25**(2):141-149.
365. Raty LKA, Larsson BMW, Soderfeldt BA. *Health-related quality of life in youth: A comparison between adolescents and young adults with uncomplicated epilepsy and healthy controls*. Journal of Adolescent Health 2003;**33**(4):252-258.

366. Ravesloot C, Seekins T, Young QR. *Health promotion for people with chronic illness and physical disabilities: The connection between health psychology and disability prevention*. *Clinical Psychology & Psychotherapy* 1998;**5**(2):76-85.
367. Ray EC, Nickels MW, Sayeed S, Sax HC. *Predicting success after gastric bypass: the role of psychosocial and behavioral factors*. *Surgery* 2003;**134**(4):555-63; discussion 563-4.
368. Rayens MK, Svavarsdottir EK. *A new methodological approach in nursing research: An actor, partner, and interaction effect model for family outcomes*. *Research in Nursing & Health* 2003;**26**(5):409-419.
369. Rena F, Moshe S, Abraham O. *Couples' adjustment of one partner's disability: The relationship between sense of coherence and adjustment*. *Social Science and Medicine* 1996;**43**(2):163-171.
370. Reynolds NR, Alonzo AA. *HIV informal caregiving: Emergent conflict and growth*. *Research in Nursing & Health* 1998;**21**(3):251-260.
371. Richardson A, Adner N, Nordstrom G. *Persons with insulin-dependent diabetes mellitus: acceptance and coping ability*. *Journal of Advanced Nursing* 2001;**33**(6):758-763.
372. Ristner G, Andersson R, Johansson LM, Johansson SE, Ponzer S. *Sense of coherence and lack of control in relation to outcome after orthopaedic injuries*. *Injury* 2000;**31**(10):751-6.
373. Ruiselova Z. *Self-evaluation of coping in the context of personal intelligence*. *Studia Psychologica* 1995;**37**(3):149-153.
374. Ruiselova Z. *Relationship between resistance to load and personality traits in elderly women*. *Studia Psychologica* 2002;**44**(3):227-233.
375. Ruiselova Z, Korcova N. *Salutogenetic approach in the context of the big five factors*. *Studia Psychologica* 2000;**42**(3):157-161.
376. Ruiselova Z, Prokopcakova A. *Sense of coherence (SOC) and its relations to cognitive (sense of control) and dynamic variables*. *Studia Psychologica* 1993;**35**(4-5):373-376.
377. Ruiselova Z, Ruisel I. *Coping and Jung's personality types*. *Studia Psychologica* 1994;**36**(4):259-264.
378. Ruiselova Z, Ruisel I. *Jung's personality types, heuristic competence and coping*. *Studia Psychologica* 1995;**37**(3):217-219.
379. Runeson R, Norback D, Stattin H. *Symptoms and sense of coherence - a follow-up study of personnel from workplace buildings with indoor air problems*. *International Archives of Occupational and Environmental Health* 2003;**76**(1):29-38.
380. Sachs A. *The other side of the world. Why does anyone care about sustainability?* *World Watch* 1998;**11**(3):31-8.
381. Sagy S. *Effects of personal, family, and community characteristics on emotional reactions in a stress situation*. *Youth & Society* 1998;**29**(3):311-330.
382. Sagy S. *Moderating factors explaining stress reactions: Comparing chronic-without-acute-stress and chronic-with-acute-stress situations*. *Journal of Psychology* 2002;**136**(4):407-419.
383. Sagy S, Antonovsky A. *The family sense of coherence and the retirement transition*. *Journal of Marriage and the Family* 1992;**54**(4):983-993.
384. Sagy S, Antonovsky H. *Structural sources of the sense of coherence - Two life stories of holocaust survivors in Israel*. *Israel Journal of Medical Sciences* 1996;**32**(3-4):200-205.

385. Sagy S, Antonovsky H. *The development of the sense of coherence: A retrospective study of early life experiences in the family*. International Journal of Aging and Human Development 2000;**51**(2):155-166.
386. Sagy S, Dotan N. *Coping resources of maltreated children in the family: a salutogenic approach*. Child Abuse & Neglect 2001;**25**(11):1463-1480.
387. Salmela Aro K. *Struggling with self: The personal projects of students seeking psychological counselling*. Scandinavian Journal of Psychology 1992;**33**(4):330-338.
388. Sammallahti P. *Evaluating defenses with the Defense Style Questionnaire: A review*. Psychiatria Fennica 1997;**28**:145-157.
389. Sammallahti PR, Holi MJ, Komulainen EJ, Aalberg VA. *Comparing two self-report measures of coping: The Sense of Coherence Scale and the Defense Style Questionnaire*. Journal of Clinical Psychology 1996;**52**(5):517-524.
390. Sammallahti PR, Holi MJ, Komulainen EJ, Aalberg VA. *Comparing two self-report measures of coping - The sense of coherence scale and the defense style questionnaire*. Journal of Clinical Psychology 2003;**59**(12):1325-1333.
391. Sandell R, Blomberg J, Lazar A. *The factor structure of Antonovsky's Sense of Coherence Scale in Swedish clinical and nonclinical samples*. Personality and Individual Differences 1998;**24**(5):701-711.
392. Sandell R, Blomberg J, Lazar A. *Time matters: On temporal interactions in long-term follow-up of long-term psychotherapies*. Psychotherapy Research 2002;**12**(1):39-58.
393. Sanden-Eriksson B. *Coping with type-2 diabetes: the role of sense of coherence compared with active management*. Journal of Advanced Nursing 2000;**31**(6):1393-1397.
394. Santavirta N, Bjorvell H, Konttinen YT, Solovieva S, Poussa M, Santavirta S. *Sense of coherence and outcome of low-back surgery: 5-year follow-up of 80 patients*. Eur Spine J 1996;**5**(4):229-35.
395. Santavirta N, Bjorvell H, Konttinen YT, Solovieva S, Poussa M, Santavirta S. *Sense of coherence and outcome of anterior low-back fusion - A 5- to 13-year follow-up of 85 patients*. Archives of Orthopaedic and Trauma Surgery 1996;**115**(5):280-285.
396. Sarid O, Anson O, Yaari A, Margalith M. *Are coping resources related to humoral reaction induced by academic stress? An analysis of specific salivary antibodies to Epstein-Barr virus and cytomegalovirus*. Psychology, Health and Medicine 2003;**8**(1):105-117.
397. Sarvimäki A, Ojala S. *De äldres livsbetingelser 2: känslan av sammanhang*. Gerontologia 1994;**8**(3):140-149.
398. Schaefer J, Nierhaus KH, Lohff B, Peters T, Schaefer T, Vos R. *Mechanisms of autoprotection and the role of stress-proteins in natural defenses, autoprotection, and salutogenesis*. Medical Hypotheses 1998;**51**(2):153-163.
399. Scherwitz L, Ornish D. *The impact of major lifestyle changes on coronary stenosis, CHD risk factors, and psychological status: Results from the San Francisco Lifestyle Heart Trial*. Homeostasis in Health and Disease 1994;**35**(4-5):190-197.
400. Schneiderman LJ, Kronick R, Kaplan RM, Anderson JP, Langer RD. *Effects of Offering Advance Directives on Medical Treatments and Costs*. Annals of Internal Medicine 1992;**117**(7):599-606.
401. Schnyder U. *Crisis intervention in psychiatric outpatients*. International Medical Journal 1997;**4**(1):11-17.
402. Schnyder U, Buechi S, Moergeli H, Sensky T, Klaghofer R. *Sense of coherence--a mediator between disability and handicap?* Psychotherapy and Psychosomatics 1999;**68**(2):102-110.

403. Schnyder U, Buechi S, Sensky T, Klaghofer R. *Antonovsky's Sense of Coherence: Trait or state?* Psychotherapy and Psychosomatics 2000;**69**(6):296-302.
404. Schnyder U, Moergeli H, Klaghofer R, Buddeberg C. *Incidence and prediction of posttraumatic stress disorder symptoms in severely injured accident victims.* American Journal of Psychiatry 2001;**158**(4):594-599.
405. Schnyder U, Morgeli H, Nigg C, Klaghofer R, Renner N, Trentz O, et al. *Early psychological reactions to life-threatening injuries.* Critical Care Medicine 2000;**28**(1):86-92.
406. Schult ML, Soderback I, Jacobs K. *The sense-of-coherence and the capability of performing daily occupations in persons with chronic pain.* Work 2000;**15**(3):189-201.
407. Schumann A, Hapke U, Meyer C, Rumpf HJ, John U. *Measuring Sense of Coherence with only three items: A useful tool for population surveys.* British Journal of Health Psychology 2003;**8**:409-421.
408. Sek H, Pasikowski T. *The quality of life, health, and sense of coherence in social context.* Polish Psychological Bulletin 1998;**29**(1):69-77.
409. Senka J. *Coping processes in groups at risk in the context of psychological health aspects.* Studia Psychologica 1995;**37**(3):154-156.
410. Senneseth T, Aanerod OK, Wold B, Torsheim T. *Skolerelaterte belastninger, mestring og subjektive helseplager blant norske 15-åringene. / School-related stress, coping, and subjective health complaints among Norwegian 15 year olds.* Tidsskrift for Norsk Psykologforening 1999;**36**(4):315-321.
411. Shahani C, Weiner R, Streit MK. *An investigation of the dispositional nature of the time management construct.* Anxiety, Stress and Coping: An International Journal 1993;**6**(3):231-243.
412. Shani E, Ayalon A, Hammad IA, Sikron F. *What picture is worth a thousand words? A comparative evaluation of a burn prevention programme by type of medium in Israel.* Health Promot Int 2003;**18**(4):361-71.
413. Shiu ATY. *The significance of sense of coherence for the perceptions of task characteristics and stress during interruptions amongst a sample of public health nurses in Hong Kong: Implications for nursing management.* Public Health Nursing 1998;**15**(4):273-280.
414. Siegrist J. *Sense of coherence and sociology of emotions.* Social Science and Medicine 1993;**37**(8):978-979.
415. Sivberg B. *Coping strategies and parental attitudes, a comparison of parents with children with autistic spectrum disorders and parents with non-autistic children.* International Journal of Circumpolar Health 2002;**61**(Suppl 2):36-50.
416. Skirka N. *The relationship of hardiness, sense of coherence, sports participation, and gender to perceived stress and psychological symptoms among college students.* Journal of Sports Medicine and Physical Fitness 2000;**40**(1):63-70.
417. Smit I, Schabracq M. *Stress, performance, and organizational cultures.* International Journal of Stress Management 1997;**4**(4):275-295.
418. Smith DF. *Functional salutogenic mechanisms of the brain.* Perspectives in Biology and Medicine 2002;**45**(3):319-328.
419. Smith PM, Breslin FC, Beaton DE. *Questioning the stability of sense of coherence - The impact of socio-economic status and working conditions in the Canadian population.* Social Psychiatry and Psychiatric Epidemiology 2003;**38**(9):475-484.
420. Smith SD. *The retirement transition and the later life family unit.* Public Health Nursing 1997;**14**(4):207-216.

421. Smith TL, Meyers LS. *The sense of coherence: Its relationship to personality, stress, and health measures*. Journal of Social Behavior and Personality 1997;**12**(2):513-526.
422. Smits CHM, Deeg DJH, Bosscher RJ. *Well-being and control in older persons: The prediction of well-being from control measures*. International Journal of Aging and Human Development 1995;**40**(3):237-251.
423. Snekkevik H, Anke AG, Stanghelle JK, Fugl-Meyer AR. *Is sense of coherence stable after multiple trauma?* Clinical Rehabilitation 2003;**17**:443-453.
424. Soderberg S, Evengard B. *Short-term group therapy for patients with chronic fatigue syndrome*. Psychotherapy and Psychosomatics 2001;**70**(2):108-111.
425. Soderberg S, Lundman B, Norberg A. *Living with fibromyalgia: Sense of coherence, perception of well-being, and stress in daily life*. Research in Nursing & Health 1997;**20**(6):495-503.
426. Soderfeldt M, Soderfeldt B, Ohlson CG, Theorell T, Jones I. *The impact of sense of coherence and high-demand/low-control job environment on self-reported health, burnout and psychophysiological stress indicators*. Work and Stress 2000;**14**(1):1-15.
427. Soderman ACH, Bagger-Sjoberg D, Bergenius J, Langius A. *Factors influencing quality of life in patients with Meniere's disease, identified by a multidimensional approach*. Otology & Neurotology 2002;**23**(6):941-948.
428. Soderman ACH, Bergenius J, Bagger-Sjoberg D, Tjell C, Langius A. *Patients' subjective evaluations of quality of life related to disease-specific symptoms, sense of coherence, and treatment in Meniere's disease*. Otology & Neurotology 2001;**22**(4):526-533.
429. Solomon HM. *The not-so-silent couple in the individual*. Journal of Analytical Psychology 1997;**42**(3):383-404.
430. Soskolne V. *Single parenthood, occupational drift and psychological distress among immigrant women from the Former Soviet Union in Israel*. Women & Health 2001;**33**(3-4):67-84.
431. Sperber AD, Carmel S, Atzmon Y, Weisberg I, Shalit Y, Neumann L, et al. *The Sense of Coherence index and the irritable bowel syndrome - A cross-sectional comparison among irritable bowel syndrome patients with and without coexisting fibromyalgia, irritable bowel syndrome non-patients, and controls*. Scandinavian Journal of Gastroenterology 1999;**34**(3):259-263.
432. Sperber AD, Carmel S, Atzmon Y, Weisberg I, Shalit Y, Neumann L, et al. *Use of the Functional Bowel Disorder Severity Index (FBDSI) in a study of patients with the irritable bowel syndrome and fibromyalgia*. American Journal of Gastroenterology 2000;**95**(4):995-998.
433. Starrin B, Joensson LR, Rantakeisu U. *Sense of coherence during unemployment*. International Journal of Social Welfare 2001;**10**(2):107-116.
434. Starzomski R, Hilton A. *Patient and family adjustment to kidney transplantation with and without an interim period of dialysis*. Nephrol Nurs J 2000;**27**(1):17-8, 21-32; discussion 33, 52.
435. Steiner A, Raube K, Stuck AE, Aronow HU, et al. *Measuring psychosocial aspects of well-being in older community residents: Performance of four short scales*. Gerontologist 1996;**36**(1):54-62.
436. Stephens T, Dulberg C, Joubert N. *Mental health of the canadian population: A comprehensive analysis*. Chronic Diseases in Canada 1999;**20**(3):12 pp.



437. Stolar GE, MacEntee MI, Hill P. *Seniors' assessment of their health and life satisfaction: The case for contextual evaluation*. International Journal of Aging and Human Development 1992;**35**(4):305-317.
438. Strang S, Strang P. *Spiritual thoughts, coping and "sense of coherence" in brain tumour patients and their spouses*. Palliative Medicine 2001;**15**(2):127-134.
439. Strauser DR, Lustig DC. *The moderating effect of sense of coherence on work adjustment*. Journal of Employment Counseling 2003;**40**(3):129-140.
440. Struempfer DJW. *The origins of health and strength: From "salutogenesis" to "fortigenesis."* South African Journal of Psychology 1995;**25**(2):81-89.
441. Struempfer DJW. *The relation between religious motivation and work-related variables amongst agricultural workers*. South African Journal of Psychology 1997;**27**(3):134-142.
442. Struempfer DJW. *Sense of coherence, negative affectivity, and general health in farm supervisors*. Psychological Reports 1997;**80**(3, Pt 1):963-966.
443. Struempfer DJW, Bands J. *Stress among clergy: An exploratory study on South African Anglican priests*. South African Journal of Psychology 1996;**26**(2):67-75.
444. Struempfer DJW, Danana N, Gouws JF, Viviers MR. *Personality dispositions and job satisfaction*. South African Journal of Psychology 1998;**28**(2):99-100.
445. Struempfer DJW, Gouws JF, Viviers MR. *Antonovsky's Sense of Coherence Scale related to negative and positive affectivity*. European Journal of Personality 1998;**12**(6):457-480.
446. Struempfer DJW, Mlonzi EN. *Antonovsky's Sense of Coherence Scale and job attitudes: Three studies*. South African Journal of Psychology 2001;**31**(2):30-37.
447. Struempfer DJW, Viviers MR, Gouws JF. *Item-phrasing in Antonovsky's Sense of Coherence Scale related to negative and positive affectivity*. Personality and Individual Differences 1998;**24**(5):669-675.
448. Struempfer DJW. *Psychosocial resilience in adults*. Studia Psychologica 1999;**41**(2):89-104.
449. Struempfer DJW. *Psychometric properties of an instrument to measure resilience in adults*. South African Journal of Psychology 2001;**31**(1):36-44.
450. Sullivan GC. *Towards Clarification of Convergent Concepts - Sense of Coherence, Will to Meaning, Locus of Control, Learned Helplessness and Hardiness*. Journal of Advanced Nursing 1993;**18**(11):1772-1778.
451. Sundquist J, Bayard Burfield L, Johansson LM, Johansson SE. *Impact of ethnicity, violence and acculturation on displaced migrants: Psychological distress and psychosomatic complaints among refugees in Sweden*. Journal of Nervous and Mental Disease 2000;**188**(6):357-365.
452. Suominen S, Ahvenainen J, Mattila K, Rautava P, Koskenvuo M. *Koherenssin tunne ja perusterveydenhuollon lääkäripalvelujen käyttö. Sense of coherence (SOC) and visits to doctors in the publicly and privately funded primary health care*. Sosiaalilääketieteellinen aikakauslehti. Journal of Social Medicine 2002;**39**(4):296-303.
453. Suominen S, Blomberg H, Helenius H, Koskenvuo M. *Sense of coherence and health--Does the association depend on resistance resources? A study of 3115 adults in Finland*. Psychology and Health 1999;**14**(5):937-948.
454. Suominen S, Helenius H, Blomberg H. *Koherenssin tunne koetun terveydentilan ennustajana*. Sosiaalilääketieteellinen Aikakauslehti 1996;**33**:7-15.
455. Suominen S, Helenius H, Blomberg H, Uutela A, Koskenvuo M. *Sense of coherence as a predictor of subjective state of health: Results of 4 years of follow-up of adults*. Journal of Psychosomatic Research 2001;**50**(2):77-86.

456. Surtees P, Wainwright N, Luben R, Khaw KT, Day N. *Sense of coherence and mortality in men and women in the EPIC-Norfolk United Kingdom Prospective Cohort Study*. American Journal of Epidemiology 2003;**158**(12):1202-1209.
457. Sutoris M. *Understanding schools as systems: Implications for the management of pupil behaviour*. Educational and Child Psychology 2000;**17**(1):51-63.
458. Svartvik L, Lidfeldt J, Nerbrand C, Samsio G, Schersten B, Nilsson PM. *High sense of coherence can have healthenhancing effects*. Läkartidningen 2002;**99**(11):1195-+.
459. Svartvik L, Lidfeldt J, Nerbrand C, Samsioe G, Schersten B, Nilsson PM. *Dyslipidaemia and impaired well-being in middle-aged women reporting low Sense of Coherence - The Women's Health in the Lund Area (WHLA) Study*. Scandinavian Journal of Primary Health Care 2000;**18**(3):177-182.
460. Svavarsdottir EK, McCubbin MA, Kane JH. *Well-being of parents of young children with asthma*. Research in Nursing and Health 2000;**23**(5):346-358.
461. Svavarsdottir EK, Rayens MK. *American and Icelandic parents' perceptions of the health status of their young children with chronic asthma*. Journal of Nursing Scholarship 2003;**35**(4):351-358.
462. Svebak S, Sondena K, Hausken T, Soreide O, Hammar A, Berstad A. *The significance of personality in pain from gallbladder stones*. Scandinavian Journal of Gastroenterology 2000;**35**(7):759-764.
463. Tang ST, Dixon J. *Instrument translation and evaluation of equivalence and psychometric properties: the Chinese Sense of Coherence Scale*. J Nurs Meas 2002;**10**(1):59-76.
464. Tedgard U, Ljung R, McNeil TF. *Long-term psychological effects of carrier testing and prenatal diagnosis of haemophilia: Comparison with a control group*. Prenatal Diagnosis 1999;**19**(5):411-417.
465. Tedgard U, Ljung R, McNeil TF. *How do carriers of hemophilia and their spouses experience prenatal diagnosis by chorionic villus sampling?* Clinical Genetics 1999;**55**(1):26-33.
466. Theorell T. *Critical life changes: A review of research*. Psychotherapy and Psychosomatics 1992;**57**(3):108-117.
467. Thorell-Ekstrand I, Bjorvell H. *Preparedness for clinical nursing-education*. Scandinavian Journal of Caring Sciences 1994;**8**(1):17-24.
468. Tishelman C. *Några kritiska reflektioner över vårt okritiska bruk av mätinstrument: Exemplet Känsla av Sammanhang frågeformulär*. Vård i Norden 1996;**1**:33-37.
469. Toppinen-Tanner S, Kalimo R. *Psychological symptoms and competence at three organizational levels of industrial design: The main and moderating role of sense of coherence*. Psychological Reports 2003;**92**(2):667-682.
470. Torsheim T, Aaroe LE, Wold B. *Sense of coherence and school-related stress as predictors of subjective health complaints in early adolescence: Interactive, indirect or direct relationships?* Social Science and Medicine 2001;**53**(5):603-614.
471. Trad PV. *The phenomenon of previewing and its contribution to the emerging sense of self*. Psychoanalytic Review 1996;**83**(1):21-47.
472. Tselebis A, Moulou A, Ilias I. *Burnout versus depression and sense of coherence: Study of Greek nursing staff*. Nursing and Health Sciences 2001;**3**(2):69-71.
473. Tuomi K, Seitsamo J, Huuhtanen P. *Stress management, aging, and disease*. Experimental Aging Research 1999;**25**(4):353-358.
474. Turner C. *Holocaust memories and history*. History of the Human Sciences 1996;**9**(4):45-63.

475. Tyni-Lenne R, Stryjan S, Eriksson B, Berglund M, Sylven C. *Beneficial therapeutic effects of physical training and relaxation therapy in women with coronary syndrome X*. *Physiother Res Int* 2002;**7**(1):35-43.
476. Unell L, Soderfeldt B, Halling A, Birkhed D. *Explanatory models for oral health expressed as number of remaining teeth in an adult population*. *Community Dent Health* 1998;**15**(3):155-61.
477. Uren TH, Wastell CA. *Attachment and meaning-making in perinatal bereavement*. *Death Studies* 2002;**26**(4):279-308.
478. Väänänen-Tomppo I, Janatuinen E, Törnqvist R. *All well at work? Evaluation of workplace-based early rehabilitation in the Finnish State administration*. *International Journal of Rehabilitation Research* 2001;**24**(3):171-180.
479. Vahtera J, Pentti J, Uutela A. *The effect of objective job demands on registered sickness absence spells: Do personal, social and job-related resources act as moderators?* *Work and Stress* 1996;**10**(4):286-308.
480. Waite PJ, Hawks SR, Gast JA. *The correlation between spiritual well-being and health behaviors*. *American Journal of Health Promotion* 1999;**13**(3):159-162.
481. Waitzkin H. *A good word for the "young man [or woman] with a gun": Whose violence? Whose "salutogenesis"?* *Social Science and Medicine* 1993;**37**(8):977-978.
482. Walsh F. *The concept of family resilience: Crisis and challenge*. *Family Process* 1996;**35**(3):261-280.
483. van Loon AJM, Tijhuis M, Surtees PG, Ormel J. *Personality and coping: Their relationship with lifestyle risk factors for cancer*. *Personality and Individual Differences* 2001;**31**(4):541-553.
484. van Selm M, Dittmann-Kohli F. *Meaninglessness in the second half of life: The development of a construct*. *International Journal of Aging & Human Development* 1998;**47**(2):81-104.
485. Veenstra M, Hofoss D. *Patient experiences with information in a hospital setting - A multilevel approach*. *Medical Care* 2003;**41**(4):490-499.
486. Weissbecker I, Salmon P, Studts JL, Floyd AR, Dedert EA, Sephton SE. *Mindfulness-based stress reduction and sense of coherence among women with fibromyalgia*. *Journal of Clinical Psychology in Medical Settings* 2002;**9**(4):297-307.
487. Wells YD, Kendig HL. *Health and well-being of spouse caregivers and the widowed*. *Gerontologist* 1997;**37**(5):666-674.
488. Wells YD, Kendig HL. *Psychological resources and successful retirement*. *Australian Psychologist* 1999;**34**(2):111-115.
489. Ventegodt S, Andersen NJ, Merrick J. *The life mission theory II. The structure of the life purpose and the ego*. *ScientificWorldJournal* 2003;**3**:1277-85.
490. Wettergren L, Langius A, Bjorkholm M, Bjorvell H. *Physical and psychosocial functioning in patients undergoing autologous bone marrow transplantation - A prospective study*. *Bone Marrow Transplantation* 1997;**20**(6):497-502.
491. Wettergren L, Langius A, Bjorkholm M, Bjorvell H. *Post-traumatic stress symptoms in patients undergoing autologous stem cell transplantation*. *Acta Oncologica* 1999;**38**(4):475-480.
492. Wills GH. *A community health role for counselling psychologists*. *Australian Psychologist* 1992;**27**(2):96-98.
493. Vinson JA. *Children with asthma: initial development of the child resilience model*. *Pediatr Nurs* 2002;**28**(2):149-58.
494. Virtanen P, Koivisto AM. *Wellbeing of professionals at entry into the labour market: A follow up survey of medicine and architecture students*. *Journal of Epidemiology and Community Health* 2001;**55**(11):831-835.

495. Virtanen P, Rantalaaho L, Koivisto AM. *Employment status passages and psychosocial well-being*. Journal of Occupational Health Psychology 2003;**8**(2):123-130.
496. Wishart L, Macerollo J, Loney P, King A, Beaumont L, Browne G, et al. *"Special steps": an effective visiting/walking program for persons with cognitive impairment*. Can J Nurs Res 2000;**31**(4):57-71.
497. Wissing MP, van Eeden C. *Empirical clarification of the nature of psychological well-being*. South African Journal of Psychology 2002;**32**(1):32-44.
498. Wolff AC, Ratner PA. *Stress, social support, and sense of coherence*. Western Journal of Nursing Research 1999;**21**(2):182-197.
499. von Bothmer MIK, Fridlund B. *Self-rated health among university students in relation to sense of coherence and other personality traits*. Scandinavian Journal of Caring Sciences 2003;**17**(4):347-357.
500. Vuori J. *Pre-employment antecedents of health resources, job factors and health risk behaviour in men and women*. Work and Stress 1994;**8**(3):263-277.
501. Yam BM, Shiu AT. *Perceived stress and sense of coherence among critical care nurses in Hong Kong: a pilot study*. J Clin Nurs 2003;**12**(1):144-6.
502. Yeheskel A. *The intimate environment and the sense of coherence among Holocaust survivors*. Social Work in Health Care 1995;**20**(3):25-35.
503. Ying YW. *Strengthening intergenerational/intercultural ties in migrant families: A new intervention for parents*. Journal of Community Psychology 1999;**27**(1):89-96.
504. Ying YW, Akutsu PD. *Psychological adjustment of Southeast Asian refugees: The contribution of sense of coherence*. Journal of Community Psychology 1997;**25**(2):125-139.
505. Ying YW, Akutsu PD, Zhang X, Huang LN. *Psychological dysfunction in Southeast Asian refugees as mediated by sense of coherence*. American Journal of Community Psychology 1997;**25**(6):839-859.
506. Ying YW, Lee PA, Tsai JL. *Cultural orientation and racial discrimination: Predictors of coherence in Chinese American young adults*. Journal of Community Psychology 2000;**28**(4):427-442.
507. Ying YW, Lee PA, Tsai JL, Hung Y, Lin M, Wan CT. *Asian American college students as model minorities: An examination of their overall competence*. Cultural Diversity and Ethnic Minority Psychology 2001;**7**(1):59-74.
508. Ying YW, Lee PA, Tsai JL, Lee YJ, Tsang M. *Network composition, social integration and sense of coherence in Chinese American young adults*. Journal of Human Behavior in the Social Environment 2001;**3**(3-4):83-98.
509. Zhang J, Vitaliano PP, Lutgendorf SK, Scanlan JM, Savage MV. *Sense of coherence buffers relationships of chronic stress with fasting glucose levels*. Journal of Behavioral Medicine 2001;**24**(1):33-55.
