# Supplementary material
Source: PubMed Central journal article supplement (PMC1757043)
Supplement: jepicomh_59_6_460__3.pdf [file jepicomh_59_6_460__3.pdf]

**Table 10.** Papers included in doctoral thesis

---

1. Berglund B. *Living with Ehlers-Danlos syndrome*. [Doctoral thesis.]. Stockholm: Karolinska Institutet and Sophiahemmet University College, Department of Nursing.; 2003.
2. Berglund B, Mattiasson AC, Nordstrom G. *Acceptance of disability and sense of coherence in individuals with Ehlers-Danlos syndrome*. *Journal of Clinical Nursing* 2003;**12**(5):770-777.
3. Berntsson L. *Health and well-being of children in the five Nordic countries in 1984 and 1996*. [Doctoral thesis.]. Göteborg: The Nordic School of Public Health.; 2000.
4. Berntsson LT, Gustafsson JE. *Determinants of psychosomatic complaints in Swedish schoolchildren aged seven to twelve years*. *Scandinavian Journal of Public Health* 2000;**28**(4):283-293.
5. Berntsson LT, Kohler L, Gustafsson JE. *Psychosomatic complaints in schoolchildren: a Nordic comparison*. *Scandinavian Journal of Public Health* 2001;**29**(1):44-54.
6. Caap-Ahlgren M, Dehlin O. *Factors of importance to the caregiver burden experienced by family caregivers of Parkinson's disease patients*. *Aging Clinical and Experimental Research* 2002;**14**(5):371-377.
7. Caap-Ahlgren. *Health-related quality of life in persons with Parkinson's disease. Aspects of symptoms, caregiving and sense of coherence*. [Doctoral thesis]. Malmö: Lund University; 2003.
8. Caap-Ahlgren M, Dehlin O. *Sense of coherence is a sensitive measure for changes in subjects with Parkinson's disease during one year*. In: Caap-Ahlgren, Marianne Health-related quality of life in persons with Parkinson's disease. Aspects of symptoms, caregiving and sense of coherence. Doctoral thesis. Faculty of Medicine, Lund University, Lund. 2003.
9. Elgan C, Samsioe G, Dykes AK. *Influence of smoking and oral contraceptives on bone mineral density and bone remodeling in young women: a 2-year study*. *Contraception* 2003;**67**(6):439-47.
10. Elgán C. *Influence of lifestyle behaviours on bone mineral density among young healthy women: A two-year study. A tentative salutary model*. [Doctoral thesis]. Lund: Lund University; 2003.
11. Feldt T. *The role of sense of coherence in well-being at work: Analysis of main and moderator effects*. *Work and Stress* 1997;**11**(2):134-147.
12. Feldt T, Rasku A. *The structure of Antonovsky's Orientation to Life Questionnaire*. *Personality and Individual Differences* 1998;**25**(3):505-516.
13. Feldt T. *Sense of coherence. Structure, stability and health promoting role in working life. Jyväskylä studies in education, psychology and social research*. [Doctoral thesis.]. Jyväskylä: University of Jyväskylä; 2000.
14. Feldt T, Leskinen E, Kinnunen U, Mauno S. *Longitudinal factor analysis models in the assessment of the stability of sense of coherence*. *Personality and Individual Differences* 2000;**28**(2):239-257.
15. Feldt T, Kinnunen U, Mauno S. *A mediational model of sense of coherence in the work context: A one-year follow-up study*. *Journal of Organizational Behavior* 2000;**21**(4):461-476.
16. Forsberg-Warleby G, Moller A, Blomstrand C. *Spouses of first-ever stroke victims: Sense of coherence in the first phase after stroke*. *Journal of Rehabilitation Medicine* 2002;**34**(3):128-133.

17. Forsberg-Wärleby G. *Spouses of stroke patients. Psychological well-being and life satisfaction*. [Doctoral thesis]. Göteborg: The Sahlgrenska Academy at Göteborg University; 2002.
18. Lindstrom B. *Children and divorce in the light of salutogenesis-Promoting child health in the face of family breakdown*. Health Promotion International 1992;7(4):289-296.
19. Lindström B. *Quality of life: A model for evaluating Health for All. Conceptual considerations and policy implications*. Soz Präventivmed 1992;37:301-306.
20. Lindström B. *The Essence of Existence. On the Quality of Life of children in the Nordic countries - Theory and Practice in Public Health*. [Doctoral thesis.]. Göteborg: Nordic School of Public Health; 1994.
21. Milberg A. *Family members' experience of palliative home care*. [Doctoral thesis]. Linköping: Linköping University; 2003.
22. Milberg A, Strang P. *Exploring comprehensibility and manageability in palliative home care: an interview study of dying cancer patients' informal carers*. In: Milberg, Anna Family members' experience of palliative home care. Doctoral thesis. Faculty of Health Sciences, Linköping University, Linköping. 2003.
23. Milberg A, Strang P. *Meaningfulness in palliative home care: An interview study of dying cancer patients' next of kin*. Palliative and Supportive Care 2003;1;1-10.
24. Nilsson B, Westman G. *The salutogenic model as a joint venture: assessment of indigestion by social workers, physicians and patients*. Scandinavian Journal of Social Welfare 1997;6:286-291.
25. Nilsson B, Westman G. *The impact of patients' influence on recovery in a group of patients with dyspepsia*. Family Practice 1999;16(5):515-521.
26. Nilsson B, Holmgren L, Westman G. *Sense of coherence in different stages of health and disease in northern Sweden: Gender and psychosocial differences*. Scandinavian Journal of Primary Health Care 2000;18(1):14-20.
27. Nilsson B. *Vad betyder känsla av sammanhang i våra liv? Aspekter på stabilitet, kön, hälsa och psykosociala faktorer*. Umeå University medical dissertations New series no 806. [Doctoral thesis.]. Umeå: Umeå University, Family Medicine, Department of Public Health and Clinical Medicine.; 2002.
28. Nilsson B, Stegmayr B, Holmgren L, Westman G. *Sense of coherence in two cross-sectional studies in northern Sweden 1994 and 1999. Patterns among men and women*. In: *Vad betyder känsla av sammanhang i våra liv? Aspekter på stabilitet, kön, hälsa och psykosociala faktorer*. [Doctoral thesis.] Family Medicine, Department of Public Health and Clinical Medicine, Umeå University. 2002.
29. Persson D, Eklund M, Isacson Å. *The experience of everyday occupations and its relation to sense of coherence - a methodological study*. Journal of Occupational Science 1999;6(1):13-26.
30. Persson D. *Aspects of meaning in everyday occupations and relationships to health-related factors*. [Doctoral thesis.]: Lund University, Department of clinical neuroscience, Division of occupational therapy.; 2001.
31. Rennemark M, Hagberg B. *Sense of coherence among the elderly in relation to their perceived life history in an Eriksonian perspective*. Aging and Mental Health 1997;1(3):221-229.
32. Rennemark M, Hagberg B. *Social network patterns among the elderly in relation to their perceived life history in an Eriksonian perspective*. Aging & Mental Health 1997;1(4):321-331.

33. Rennemark M. *Wellbeing in old age. Life history evaluations, sense of coherence and social networks in relation to health*. [Doctoral thesis.]. Lund: Lund university, Department of Psychology; 1999.
34. Rennemark M, Hagberg B. *What makes old people perceive symptoms of illness? The impact of psychological and social factors*. *Aging & Mental Health* 1999;**3**(1):79-87.
35. Suominen S. *Perceived health and life control. A theoretical review and empirical study about the connections between health and life control determined according to the strength of the sense of coherence*. [Doctoral thesis.]. Jyväskylä: STAKES - National Research and Development Centre for Welfare and Health, Research Reports 26.; 1993.
36. Takkinen S. *Meaning in life and its relation to functioning in old age*. Jyväskylä studies in education, psychology and social research 167. [Doctoral thesis.]. Jyväskylä: Faculty of Social Sciences, University of Jyväskylä; 2000.
37. Takkinen S, Aunola K, Feldt T, Leinonen R, Ruoppila I. *The relations between generalized resistance resources, sense of coherence and health among elderly Finnish people*. In: Takkinen, Sanna *Meaning in life and its relation to functioning in old age*. Doctoral thesis. Jyväskylä Studies in Education, Psychology and Social Research. Jyväskylä university, Jyväskylä. 2000.
38. Takkinen S, Ruoppila I. *Meaning in life in three samples of elderly persons with high cognitive functioning*. *International Journal of Aging and Human Development* 2001;**53**(1):51-73.
39. Takkinen S, Ruoppila I. *Meaning in life as an important component of functioning in old age*. *International Journal of Aging and Human Development* 2001;**53**(3):211-231.
